# Supplementary material
Source: Research Square preprint supplement (doi:10.21203/rs.3.rs-10075143/v1)
Supplement: Supplementary file 1 [file 6f09b9c5aada6d258d8e55c7.docx]

**Supplementary Information**

of

**Vertically Partitioned Interfacial Design in Self-Powered Perovskite Photomemristors Enables CMOS-Integrated Motion Vision System**

Lunyao Pan1, Shixiu Sun1, Xu Zhang1, Lin Gao1, Yujie Peng1, Jianghao Tian1, Zirui Tian1, Zhennan Tian1, Haozhe Liu1, Haihong Guo1, Qiao Luo1, Taiyu Li1, Ding Zheng1, *, Junsheng Yu1, *

1. State Key Laboratory of Electronic Thin Films and Integrated Devices, School of Optoelectronic Science and Engineering, University of Electronic Science and Technology of China, Chengdu 610054, PR China.

*Correspondence and requests for materials should be addressed to D. Z. (dingzheng@uestc.edu.cn), J. Y. (jsyu@uestc.edu.cn)


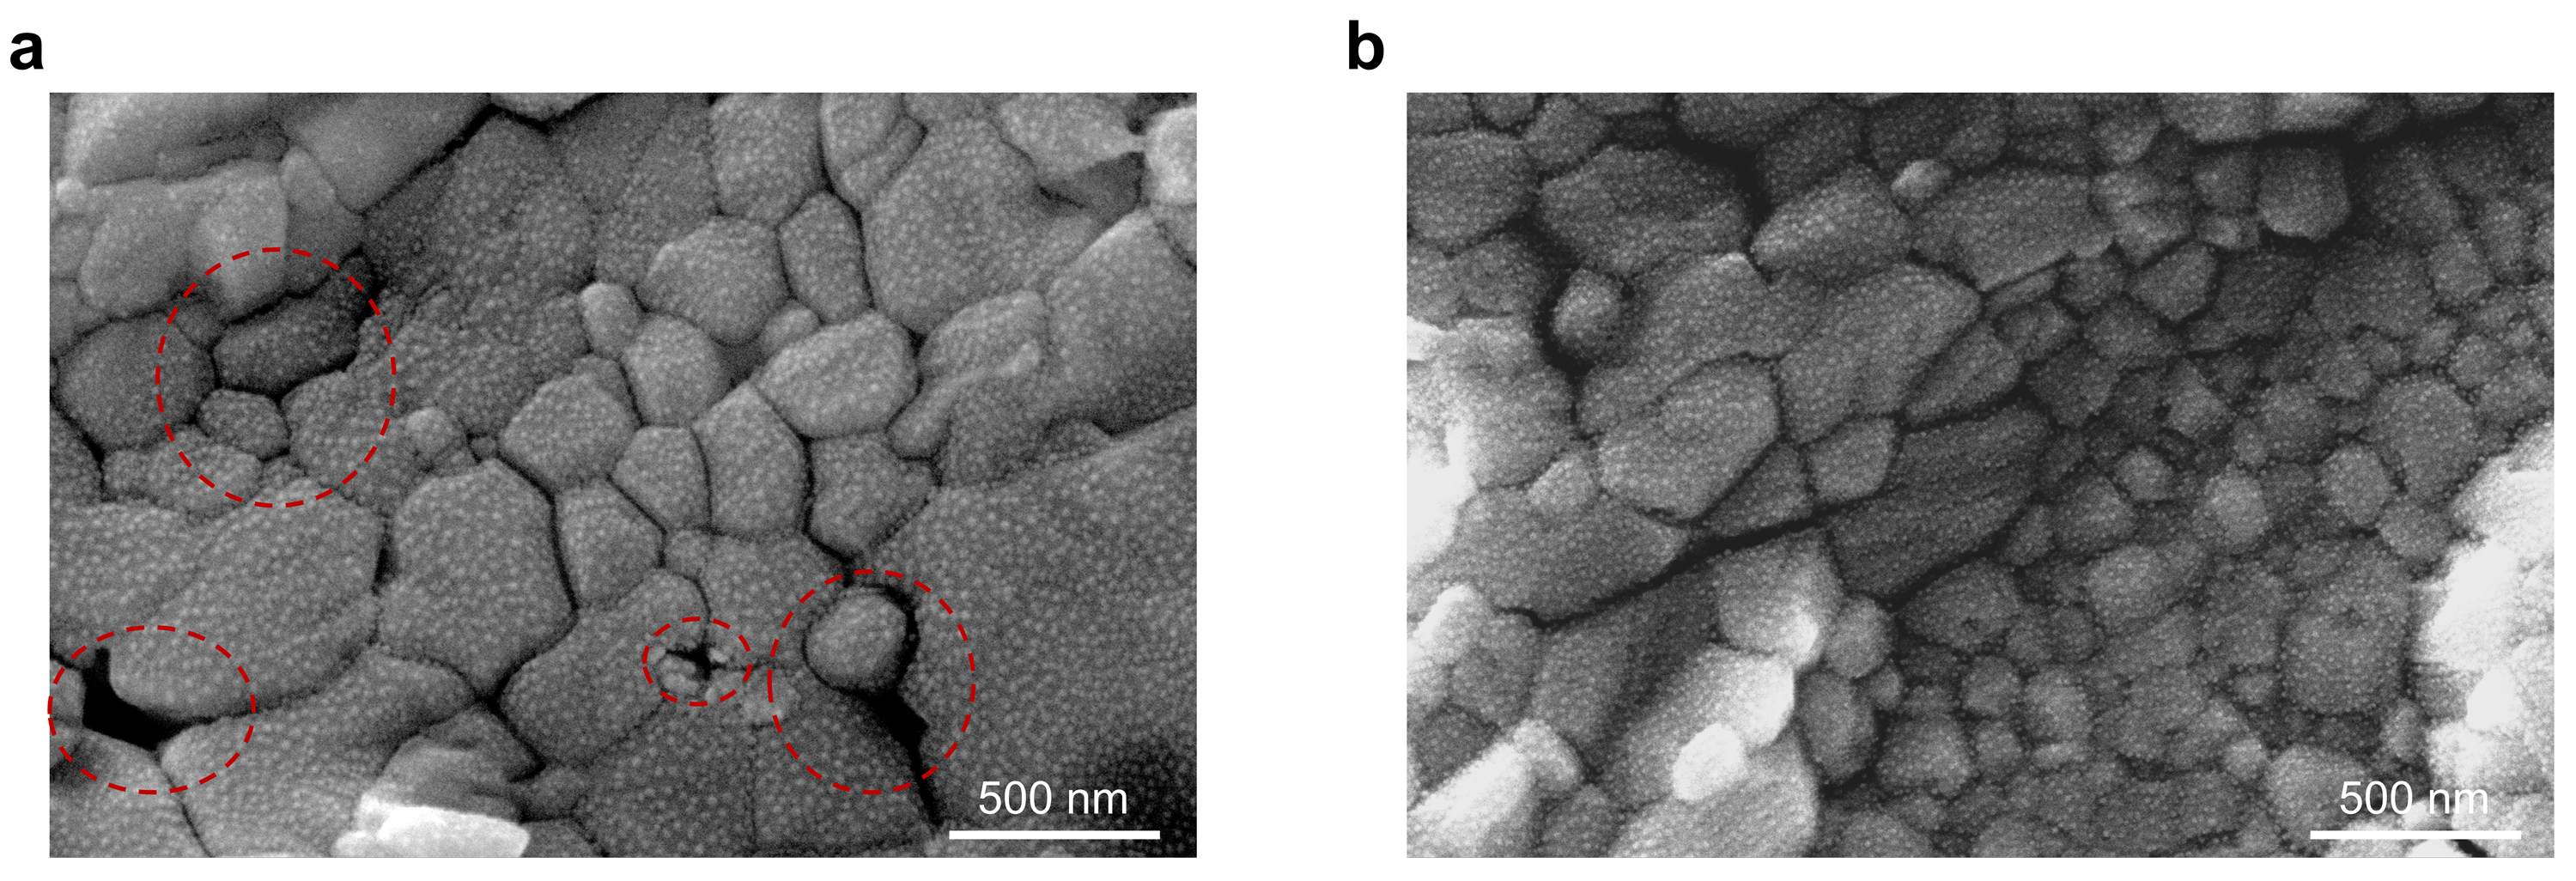


**Supplementary Figure 1. Morphological characterization of MAPbI3 films on different buried interfaces.** SEM images of MAPbI3 films deposited on the substrate a) without P3HT and b) on the treated P3HT film. The P3HT interface promotes a more continuous MAPbI3 morphology.


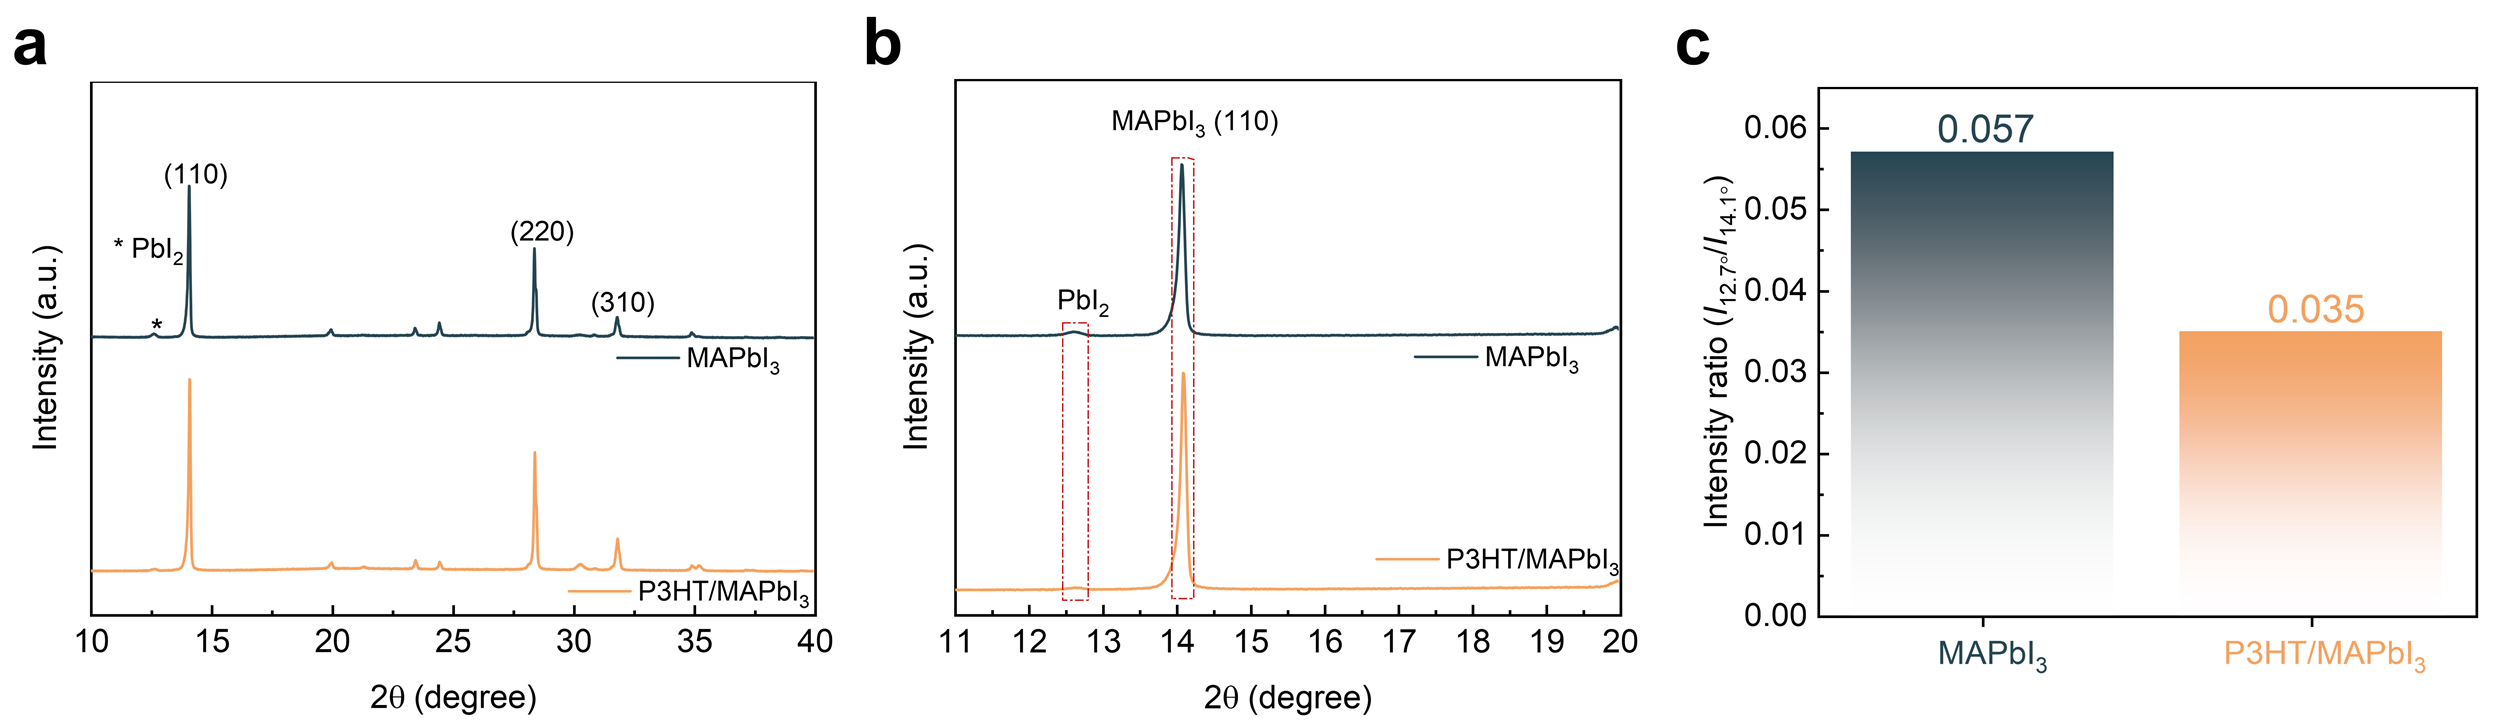


**Supplementary Figure 2. XRD characterization of MAPbI3 films on different buried interfaces.** a) XRD patterns of MAPbI3 films deposited on substrates without P3HT and on treated P3HT films. b) Enlarged PbI2-and MAPbI3 (110) related diffraction region. c) Quantitative comparison of the PbI2-related and MAPbI3 (110) diffraction features. The reduced PbI2-related contribution and strengthened MAPbI3 diffraction feature indicate that the treated P3HT buried layer promotes more favourable perovskite crystallization.


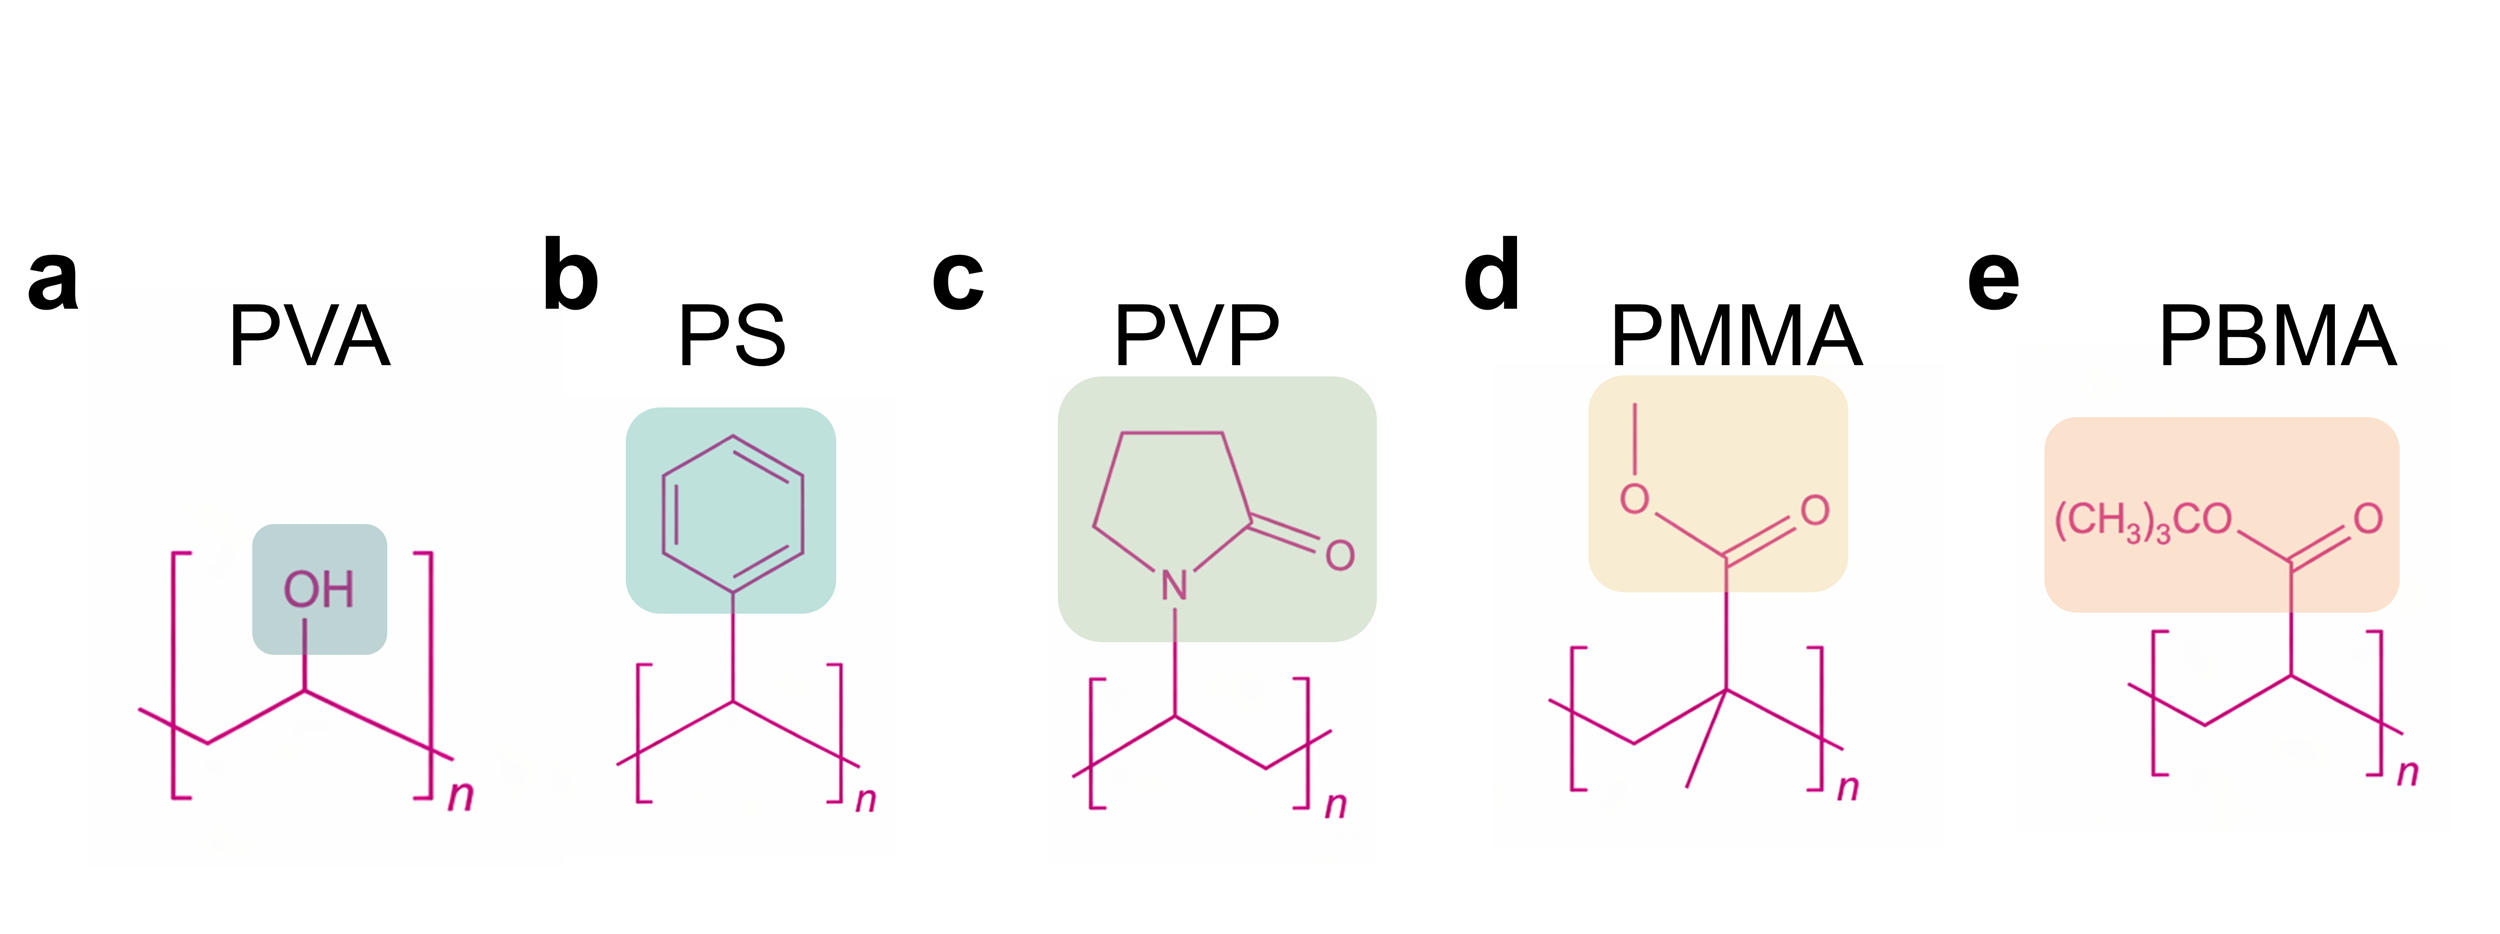


**Supplementary Figure 3.** **Chemical structures of top interface polymers.** Molecular structures of a) PVA, b) PS, c) PVP, d) PMMA and e) PBMA. The selected polymer series provides hydroxyl, phenyl, lactam carbonyl, ester carbonyl and butyl-substituted ester carbonyl motifs, enabling systematic evaluation of side-chain-dependent Pb-defect binding, iodide redistribution and interfacial electron recovery.


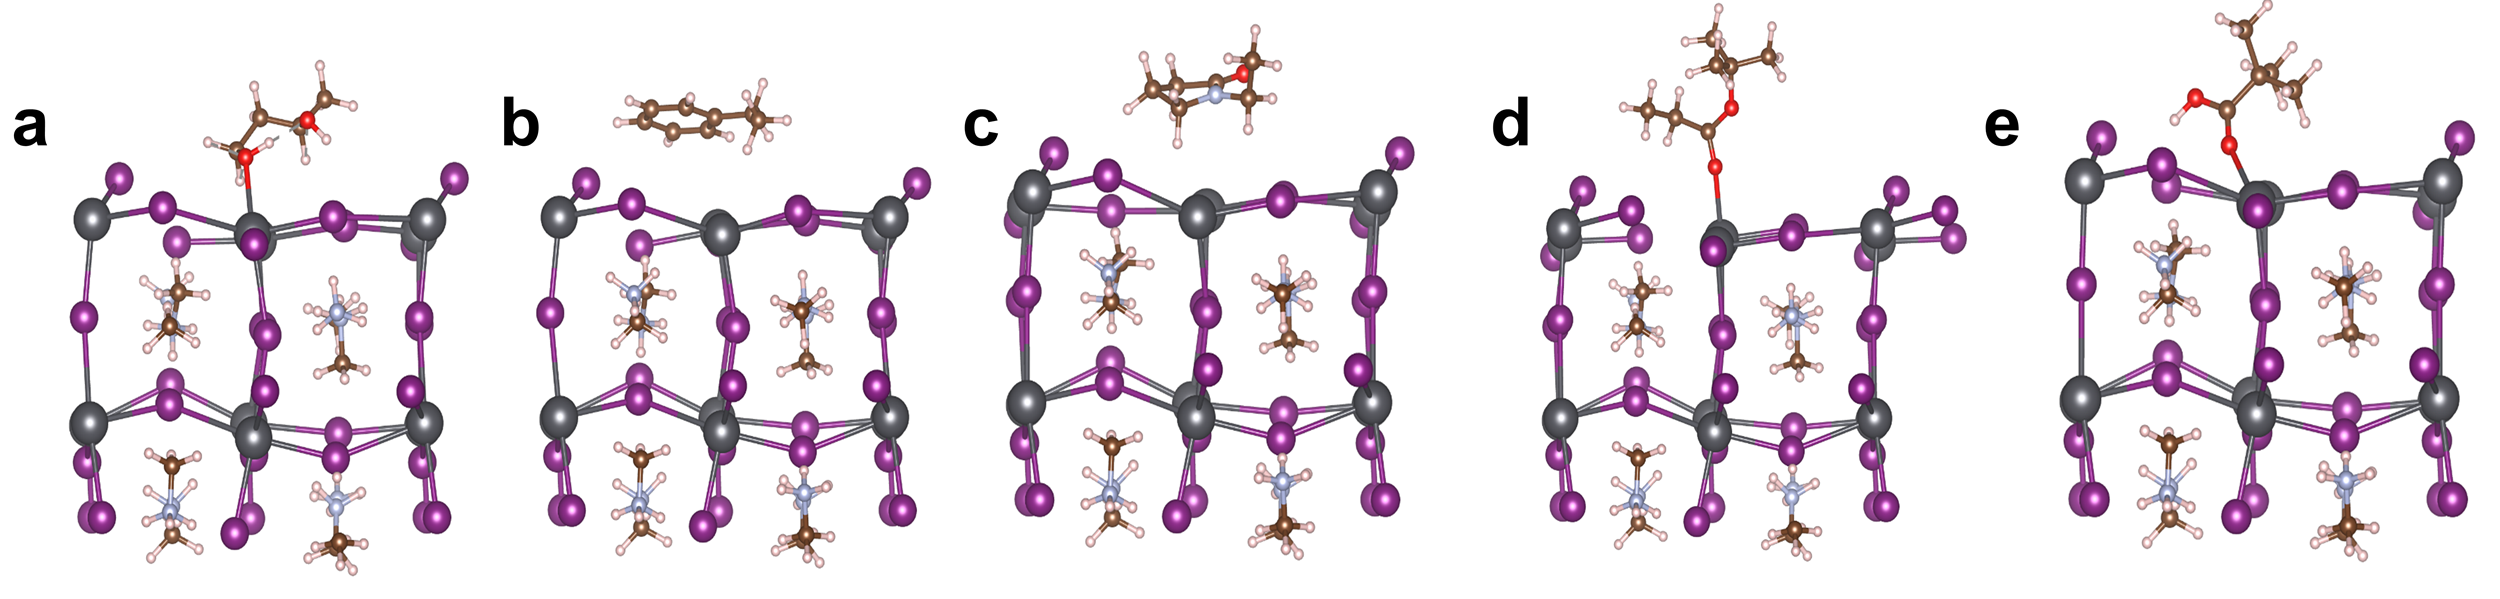


**Supplementary Figure 4. DFT-optimized structure MAPbI3/polymer adsorption configuration a) PVA, b) PS, c) PVP, d) PMMA and e) PBMA**. DFT-optimized geometries of PVA, PS, PVP, PMMA and PBMA motifs adsorbed on the MAPbI3 top surface. The configurations reveal distinct interfacial contact modes governed by side-chain chemistry, providing the structural basis for comparing binding energy, charge transfer and iodide-migration barriers.


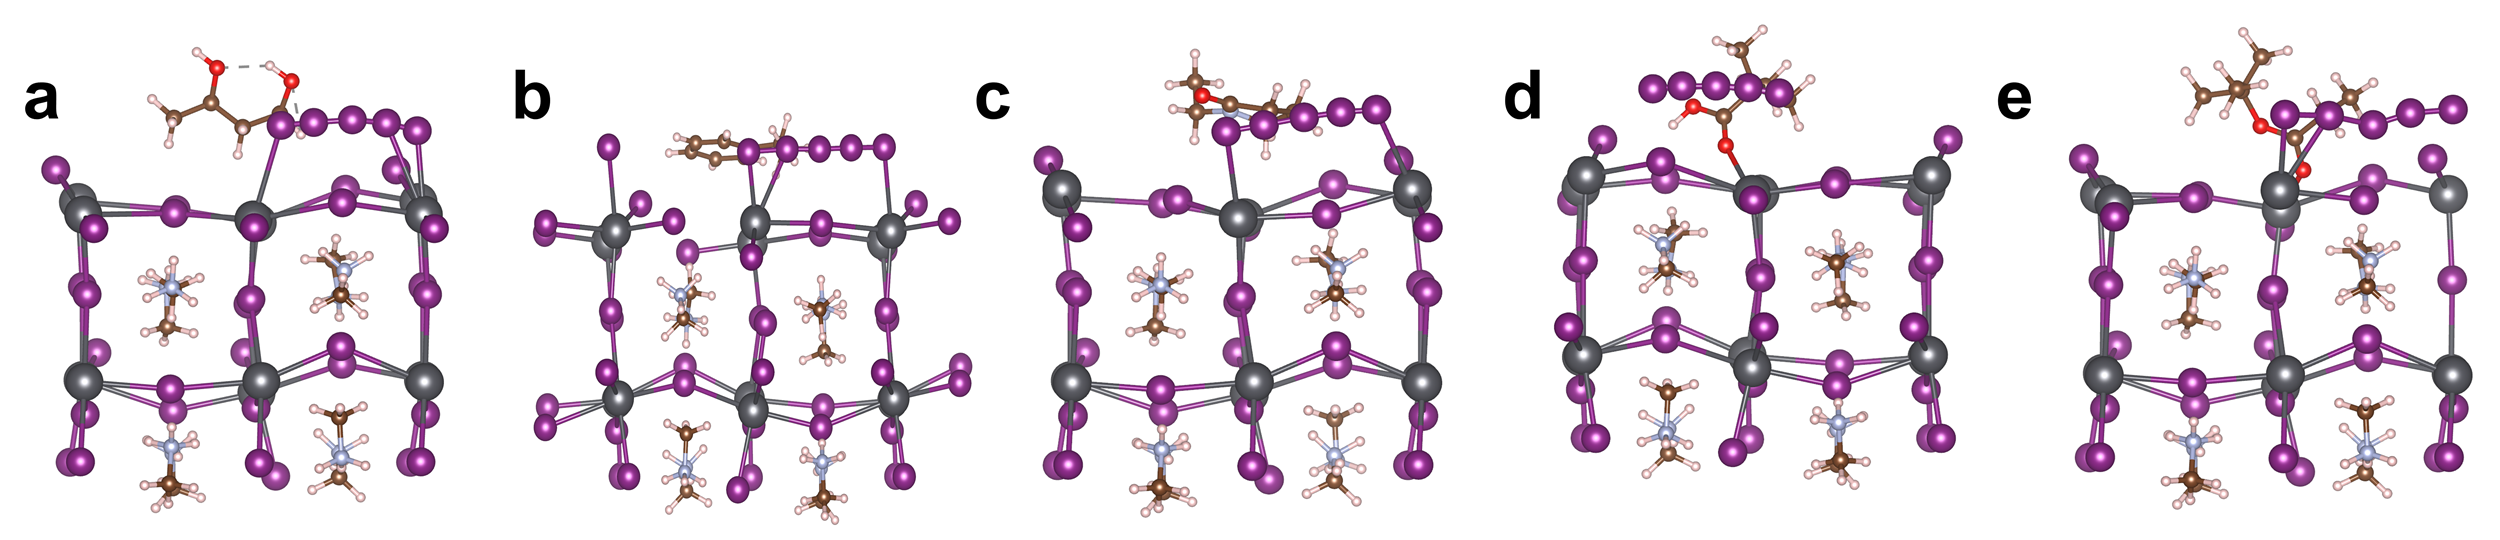


**Supplementary Figure 5. Transition-state configurations for I⁻ migration after polymer adsorption.** The figure displays calculated transition-state configurations for I⁻ migration on MAPbI3 surfaces modified with a) PVA, b) PS, c) PVP, d) PMMA and e) PBMA, showing the atomic configurations used for comparing polymer-dependent iodide migration pathways. Ester-carbonyl-containing PMMA and PBMA increase the migration barrier relative to hydroxyl-, phenyl- and lactam-based interfaces, with PBMA giving the strongest suppression of iodide displacement owing to ester-carbonyl/Pb coordination, while its longer butyl side chain further regulates electron-side relaxation.


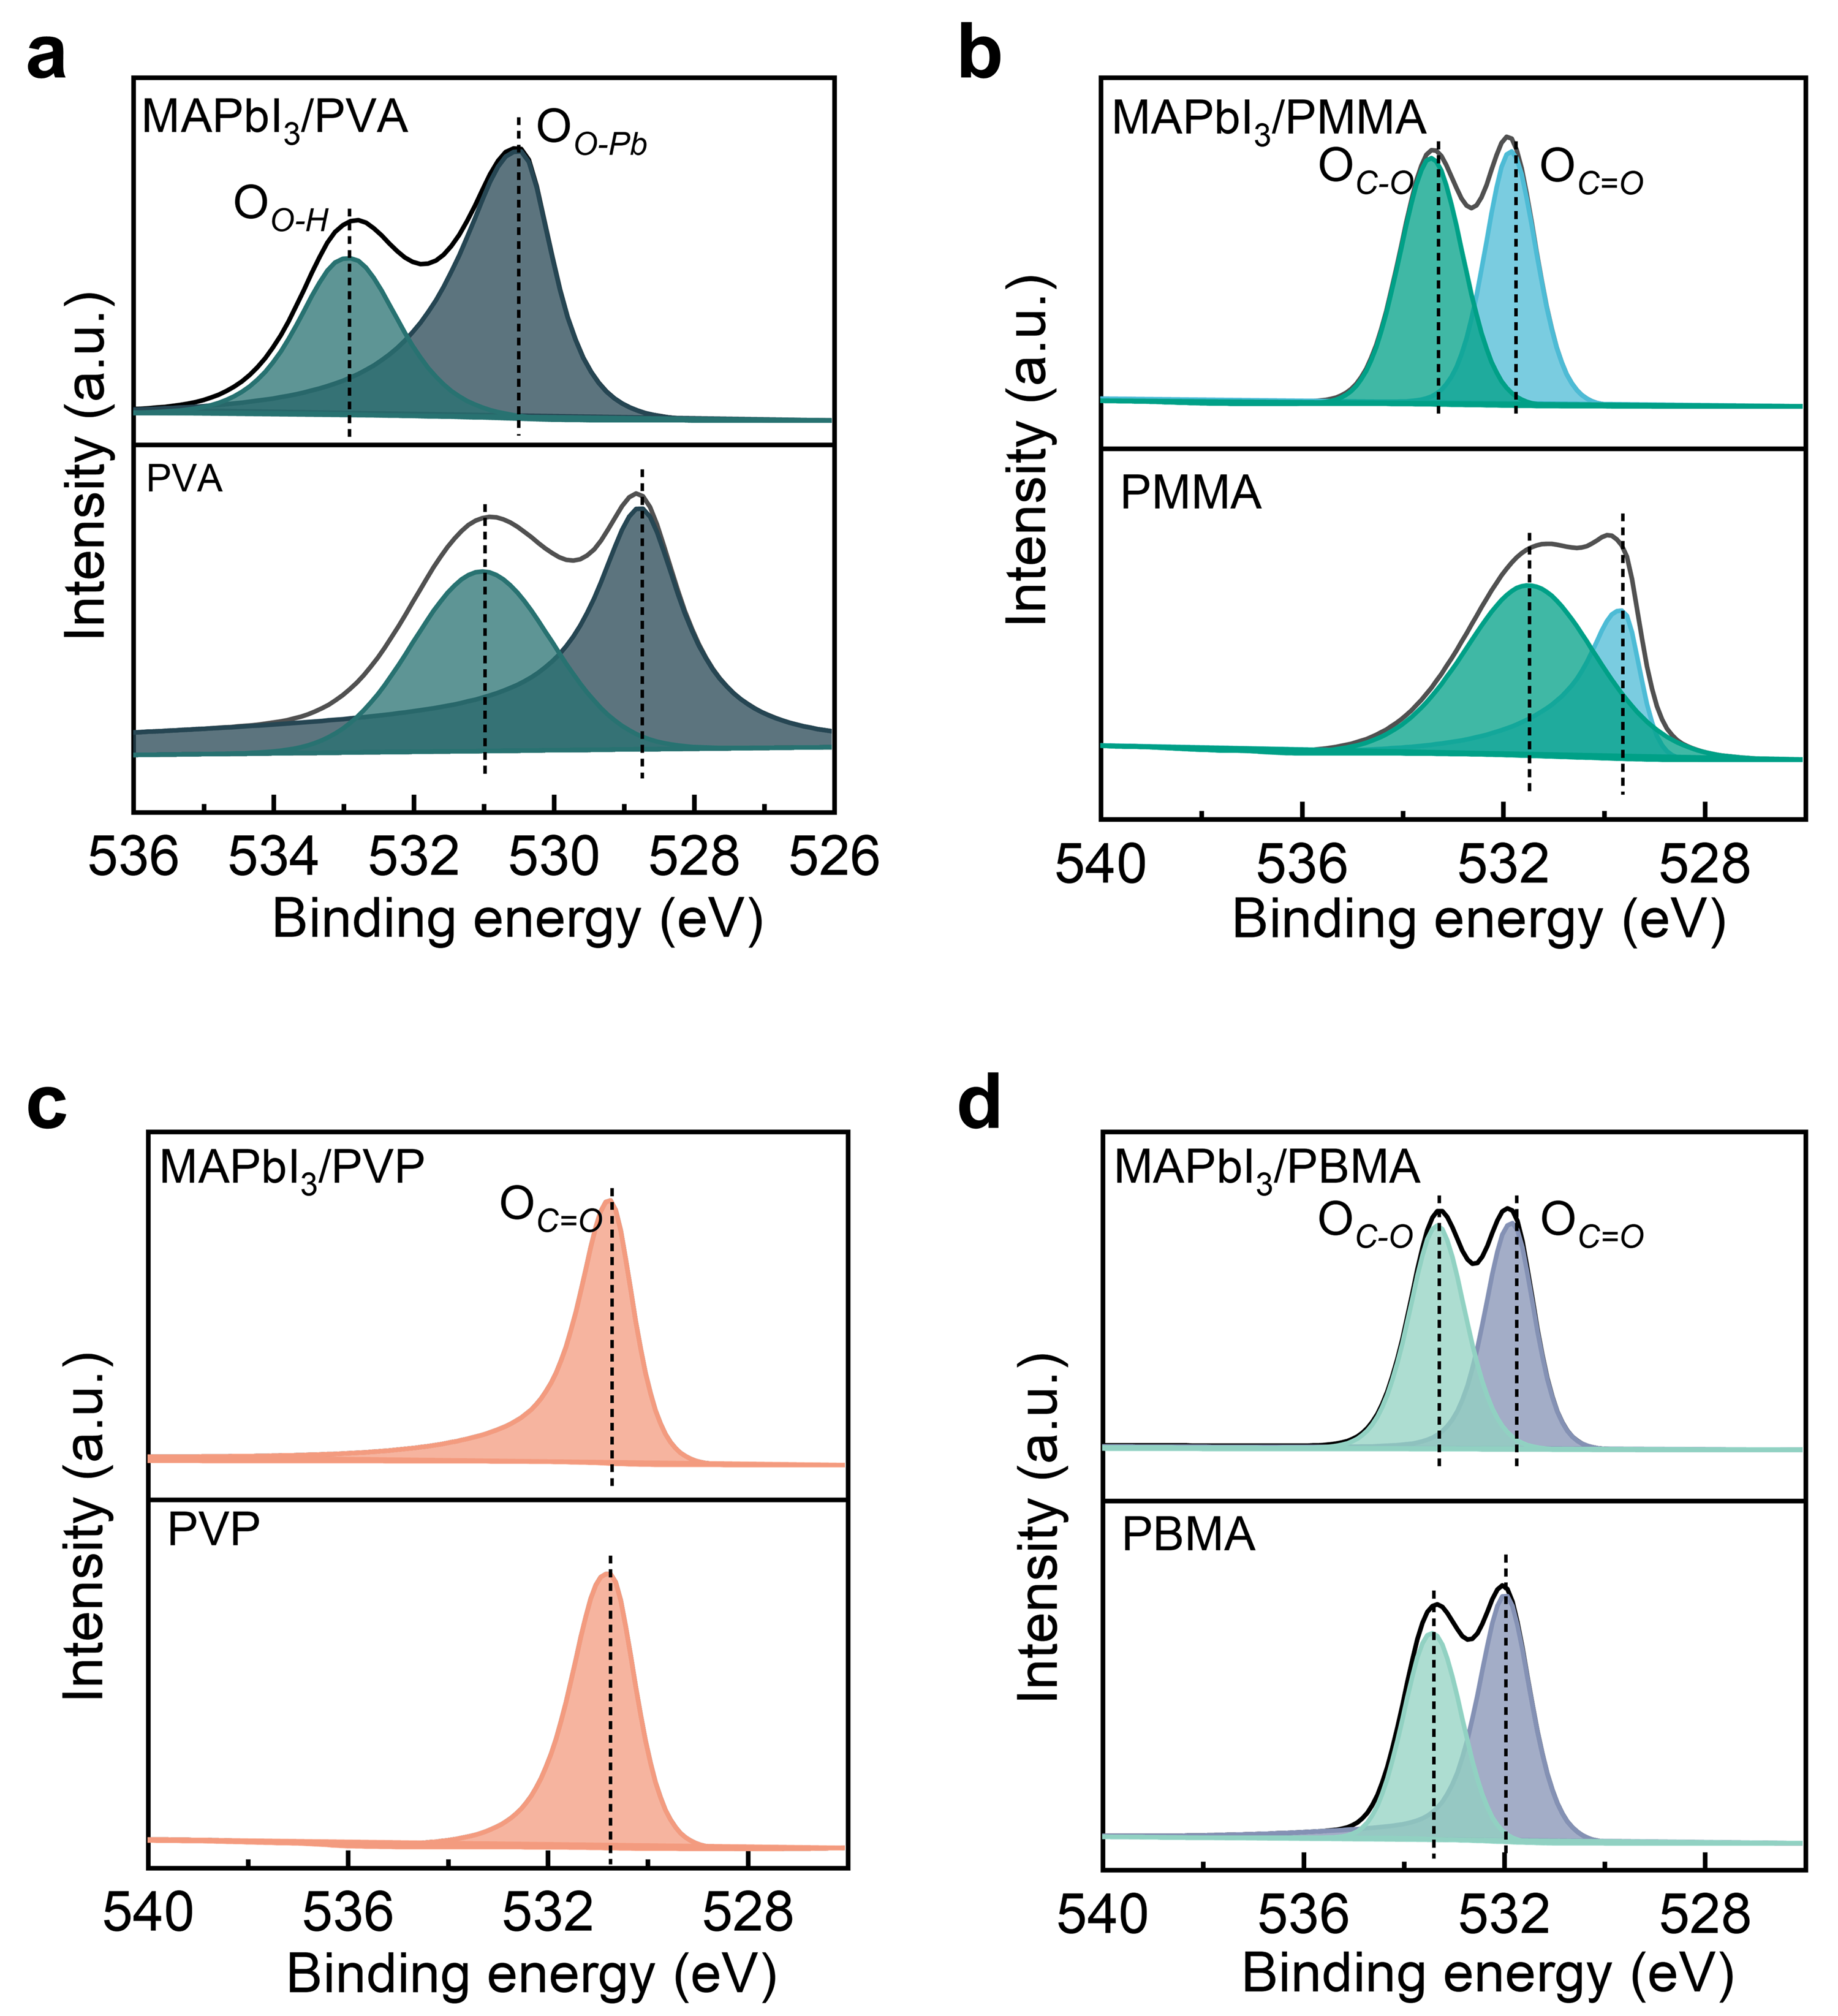


**Supplementary Figure 6. O 1s XPS spectra of polymer-modified MAPbI3 films.** O 1s spectra of MAPbI3 films modified with a) PVA, b) PVP, c) PMMA and d) PBMA. PS is not included because it contains no oxygen-bearing functional groups. The polymer-dependent evolution of the O 1s signal indicates distinct oxygen-related coordination environments at the MAPbI3/polymer top interface.


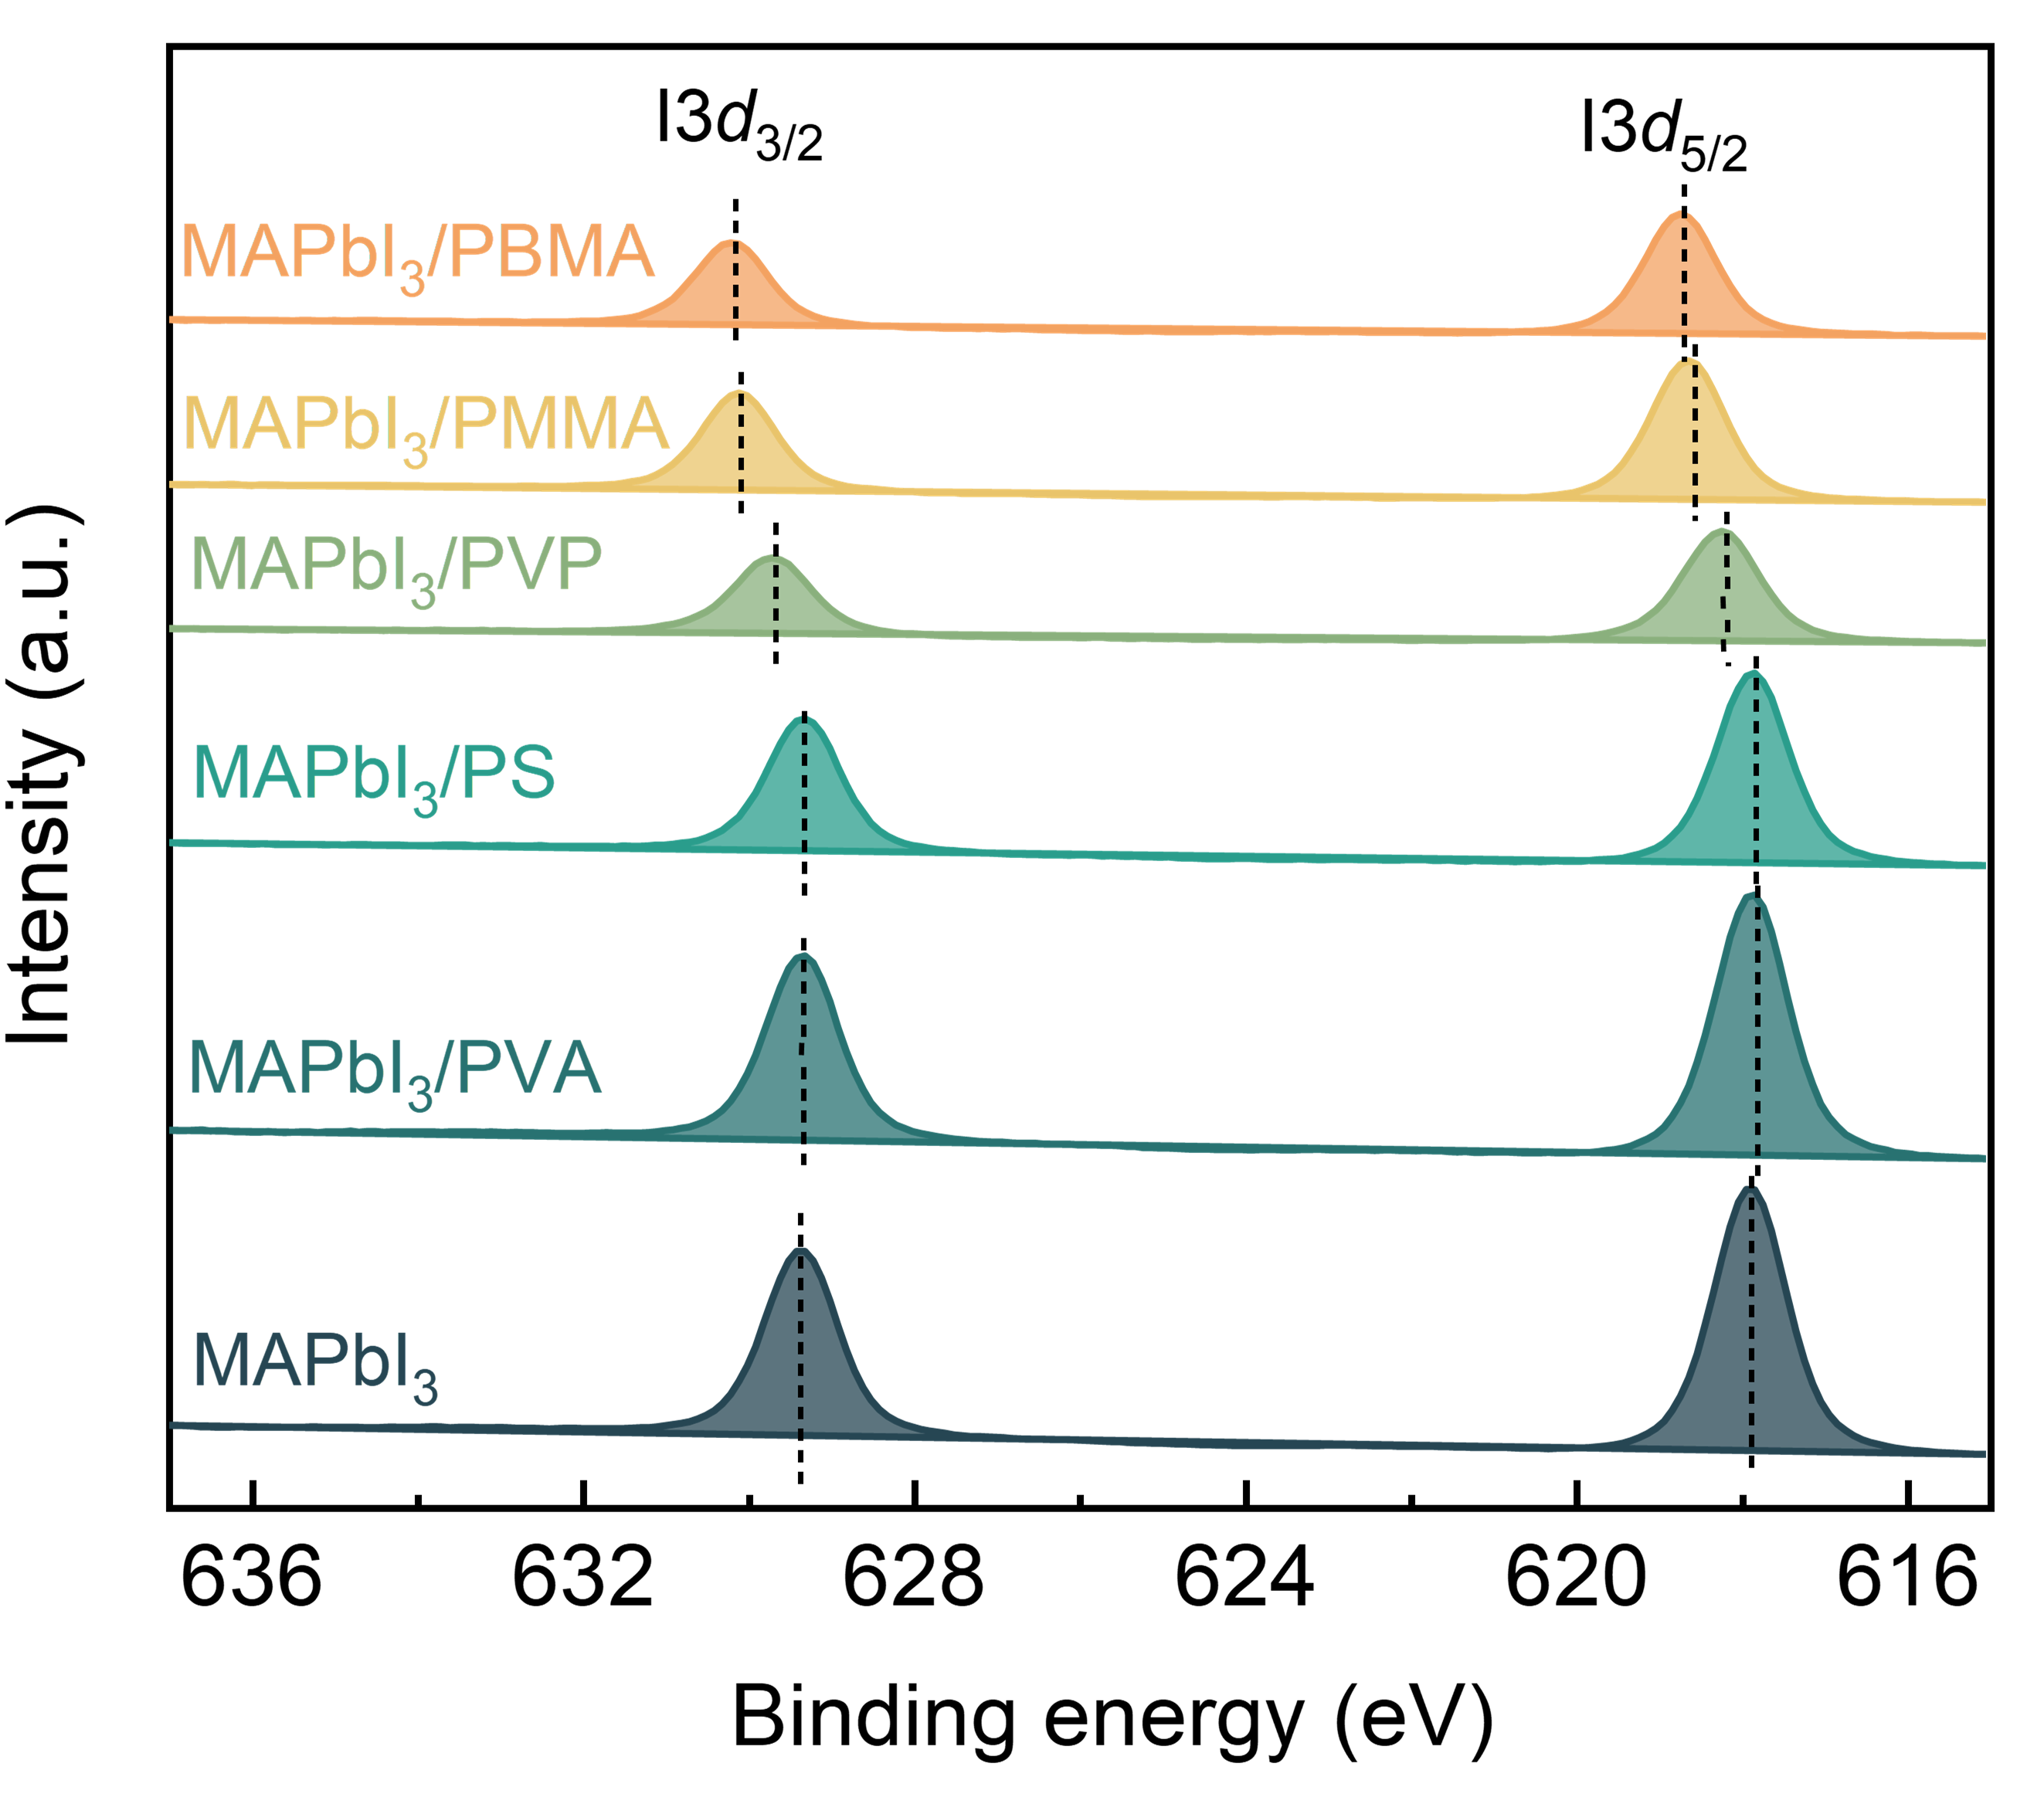


**Supplementary Figure 7. I 3d XPS spectra of polymer-modified MAPbI3 films.** The Supplementary Figure shows I 3d XPS spectra of MAPbI3 films modified with different polymer top layer. The side-chain-dependent spectral evolution indicates that polymer interfacial chemistry modulates the local iodide environment, consistent with restricted iodide redistribution at ester-carbonyl-containing interfaces.


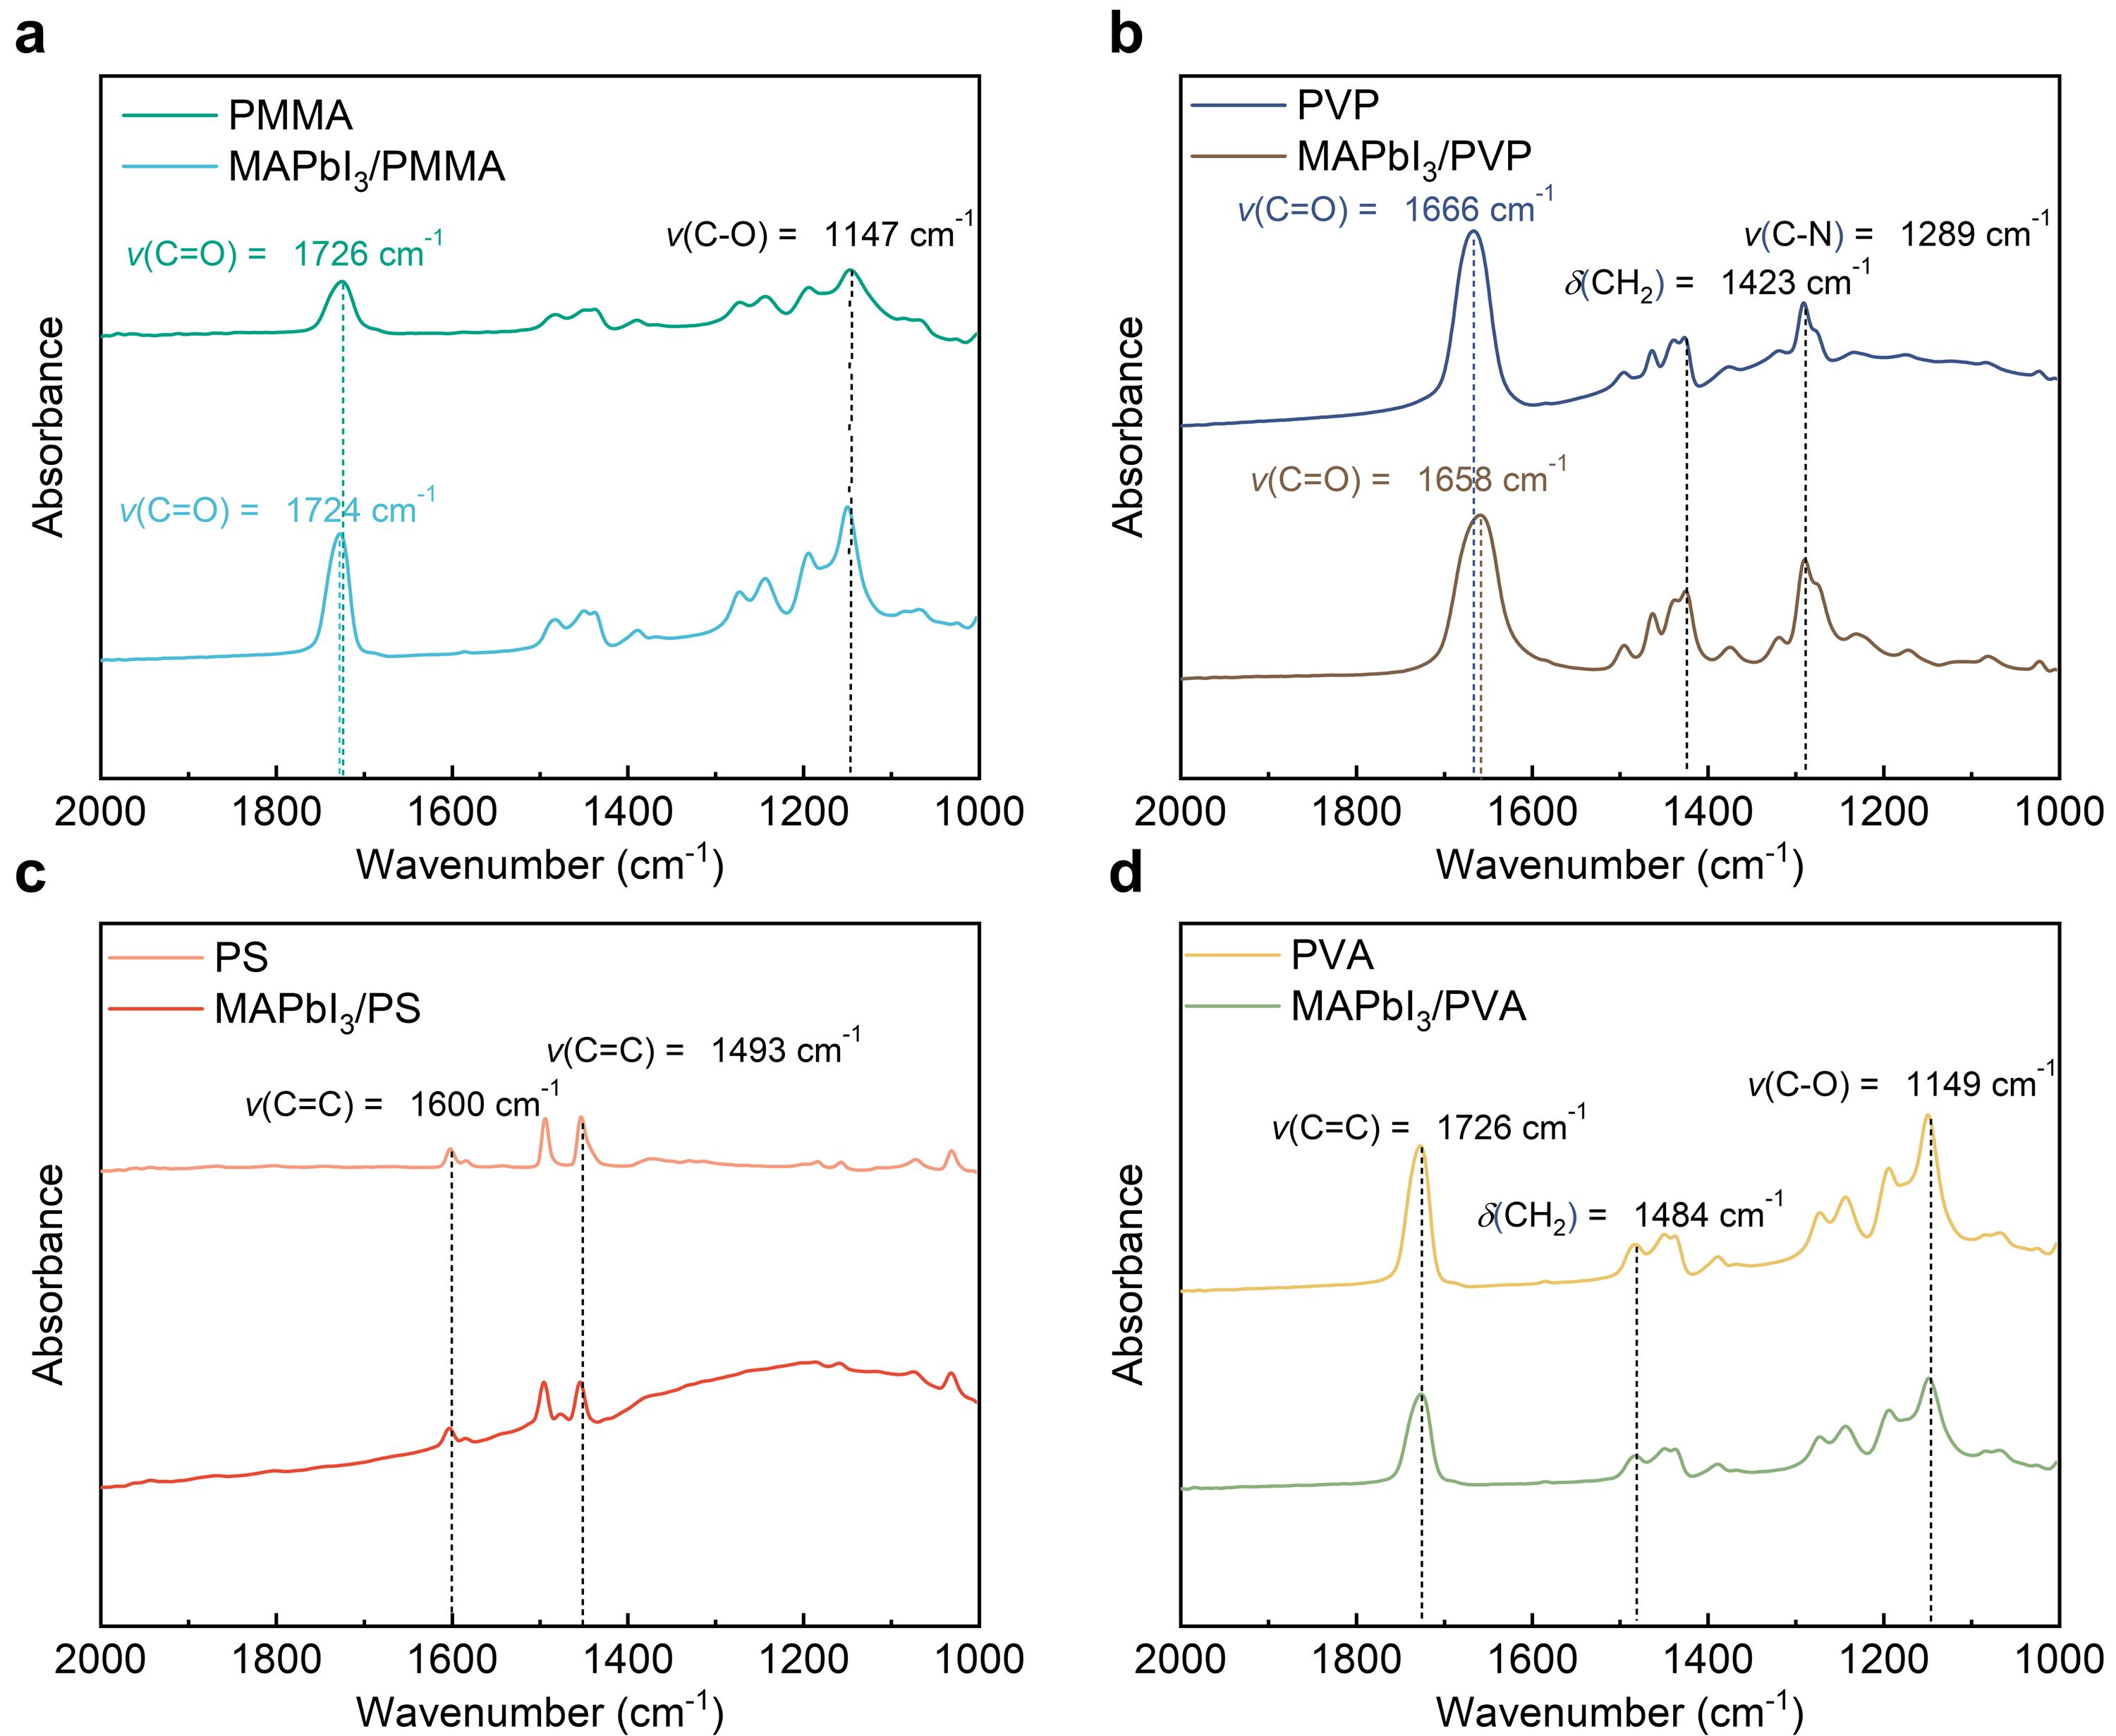


**Supplementary Figure 8. FTIR spectra of pristine polymers and MAPbI3/polymer interfaces.** The figure displays FTIR spectra of pristine polymers and the corresponding MAPbI3/polymer interfaces, showing the characteristic vibrational features before and after contact with MAPbI3. The displacement of carbonyl-related vibrations after contact with MAPbI3 confirms the participation of polymer side groups in interfacial binding, particularly for PMMA and PBMA where ester carbonyl motifs coordinate with Pb-related defect sites.


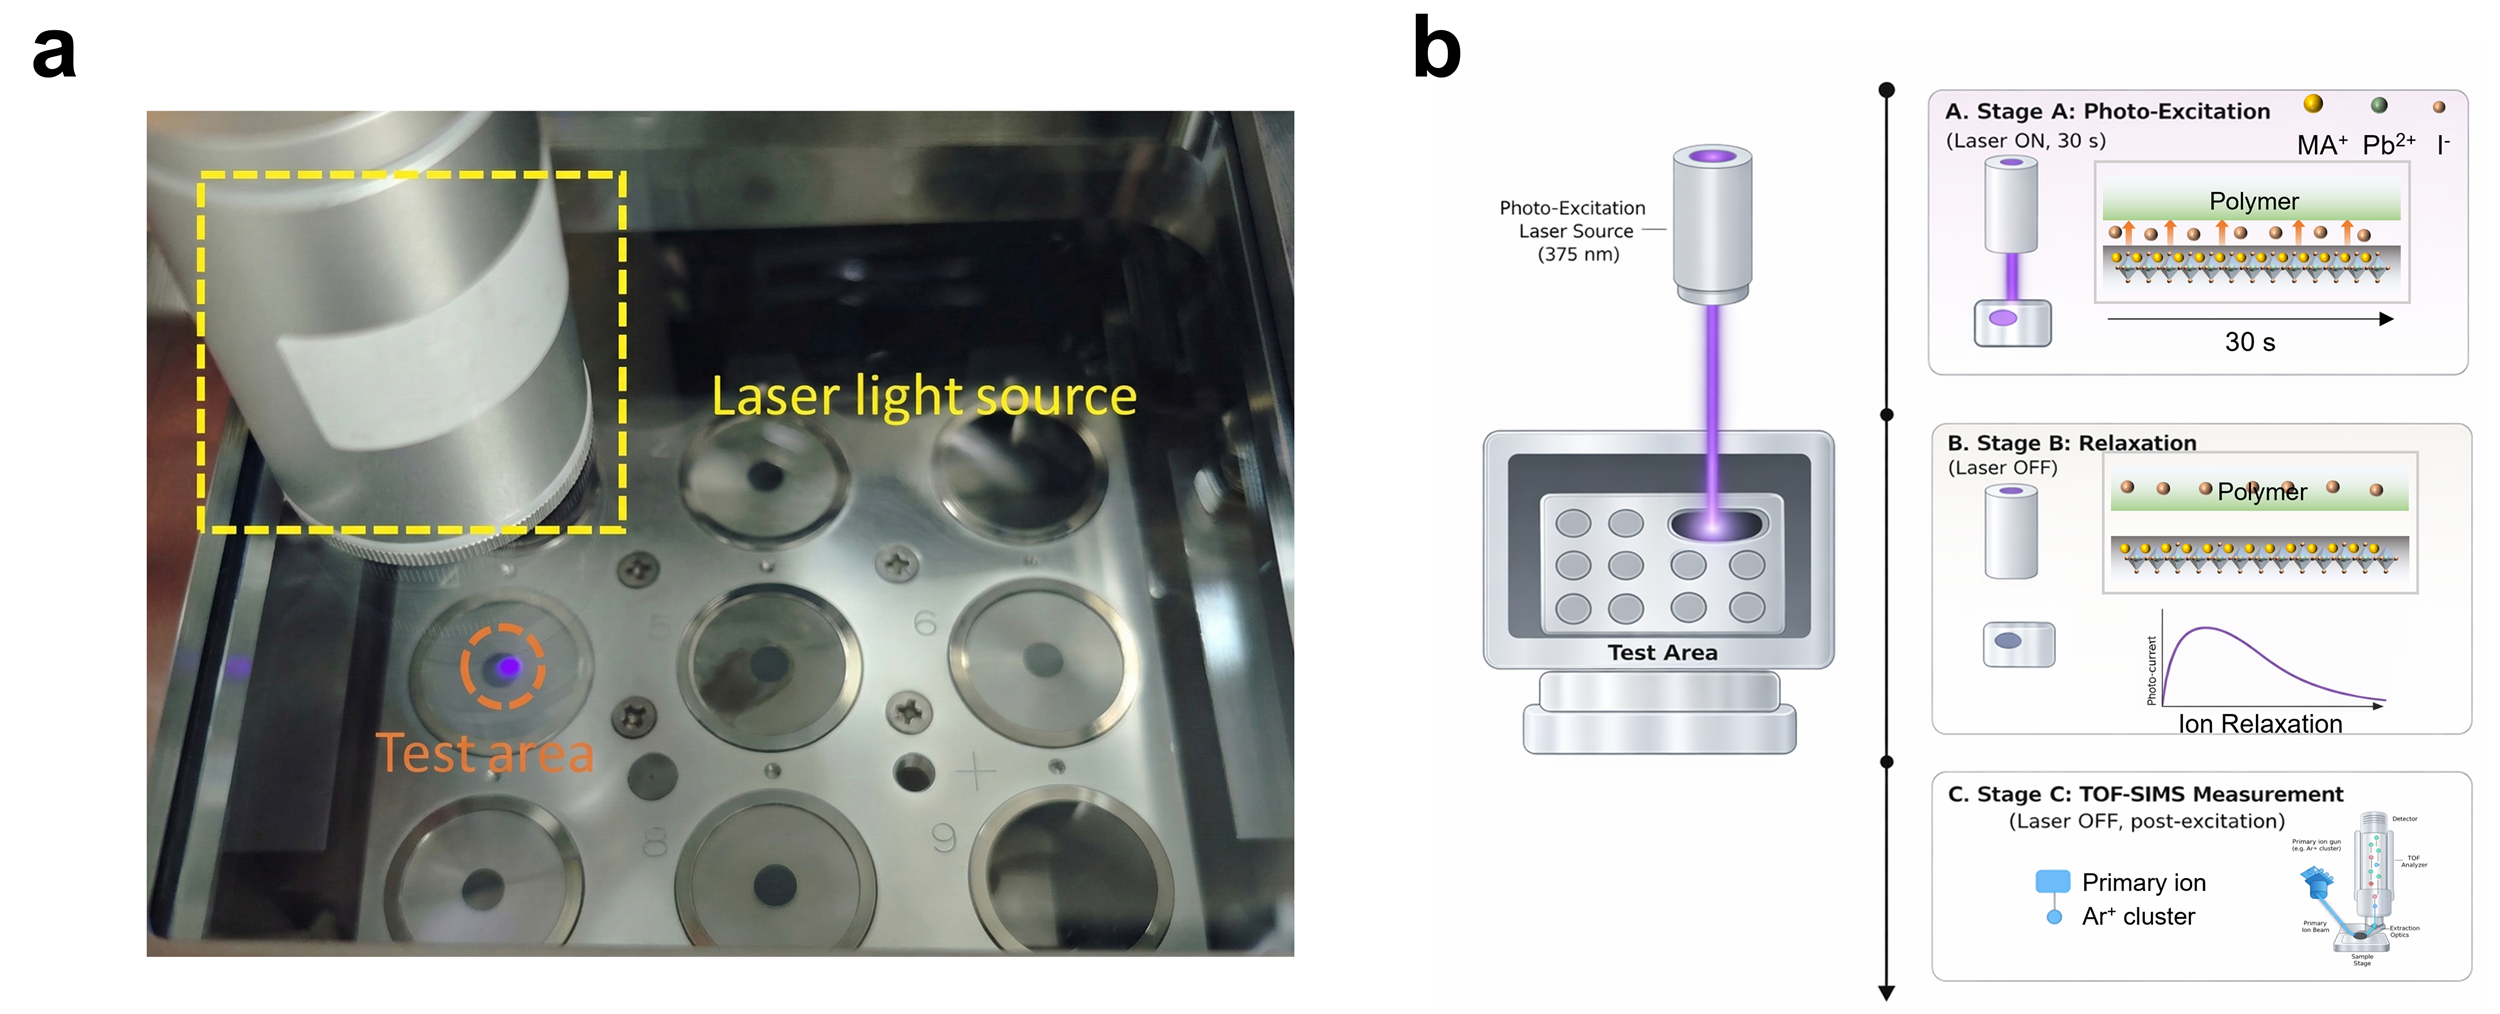


**Supplementary Figure 9. ToF-SIMS setup for optical-excitation measurements.** a) Photograph of the custom-built 375 nm illumination ToF-SIMS setup. b) Schematic illustration of the measurement configuration: i) 375 nm optical excitation of the P3HT/MAPbI3/polymer heterostructure for a duration of 30 s, ii) light-induced ion redistribution and interfacial accumulation within the MAPbI3/polymer top region, and iii) depth-resolved ToF-SIMS sputtering and ion-fragment collection for reconstructing the three-dimensional ionic distribution.


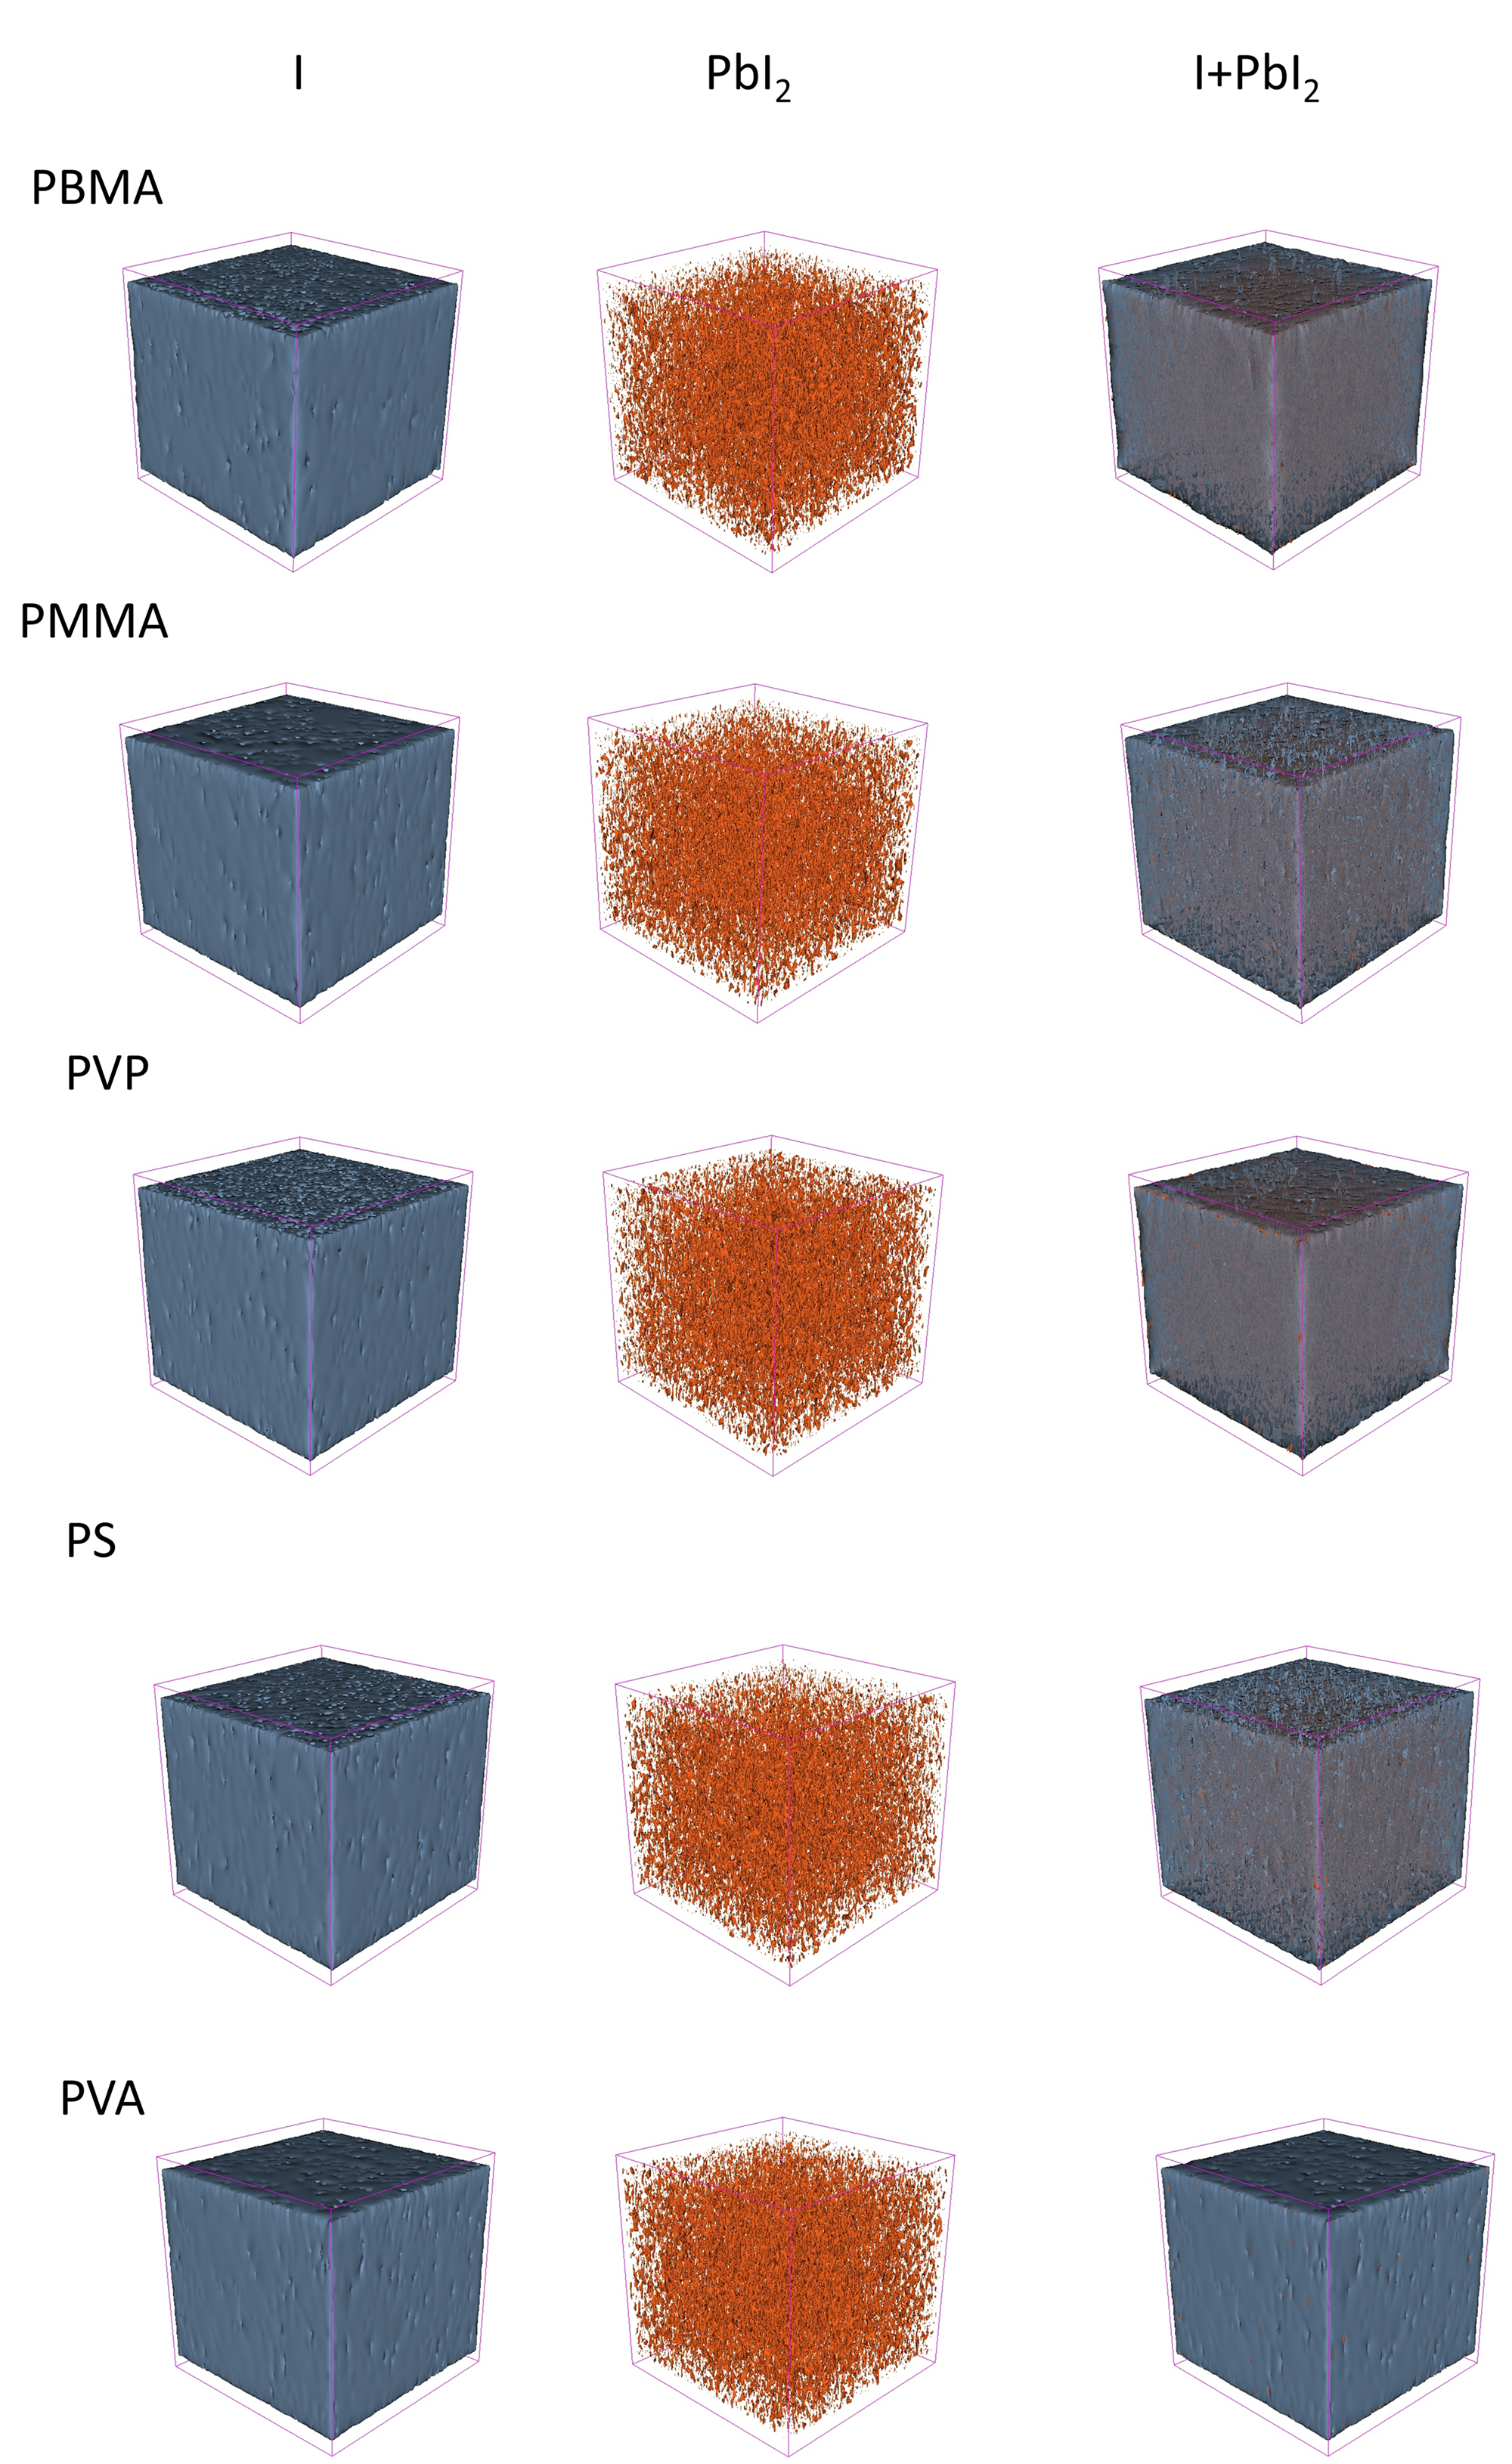


**Supplementary Figure 10. 3D ToF-SIMS analysis of P3HT/MAPbI₃/polymer.** 3D ion-distribution maps of polymer-modified heterostructures under optical excitation. The I signal visualizes polymer-dependent halide redistribution across the MAPbI3/polymer interface.


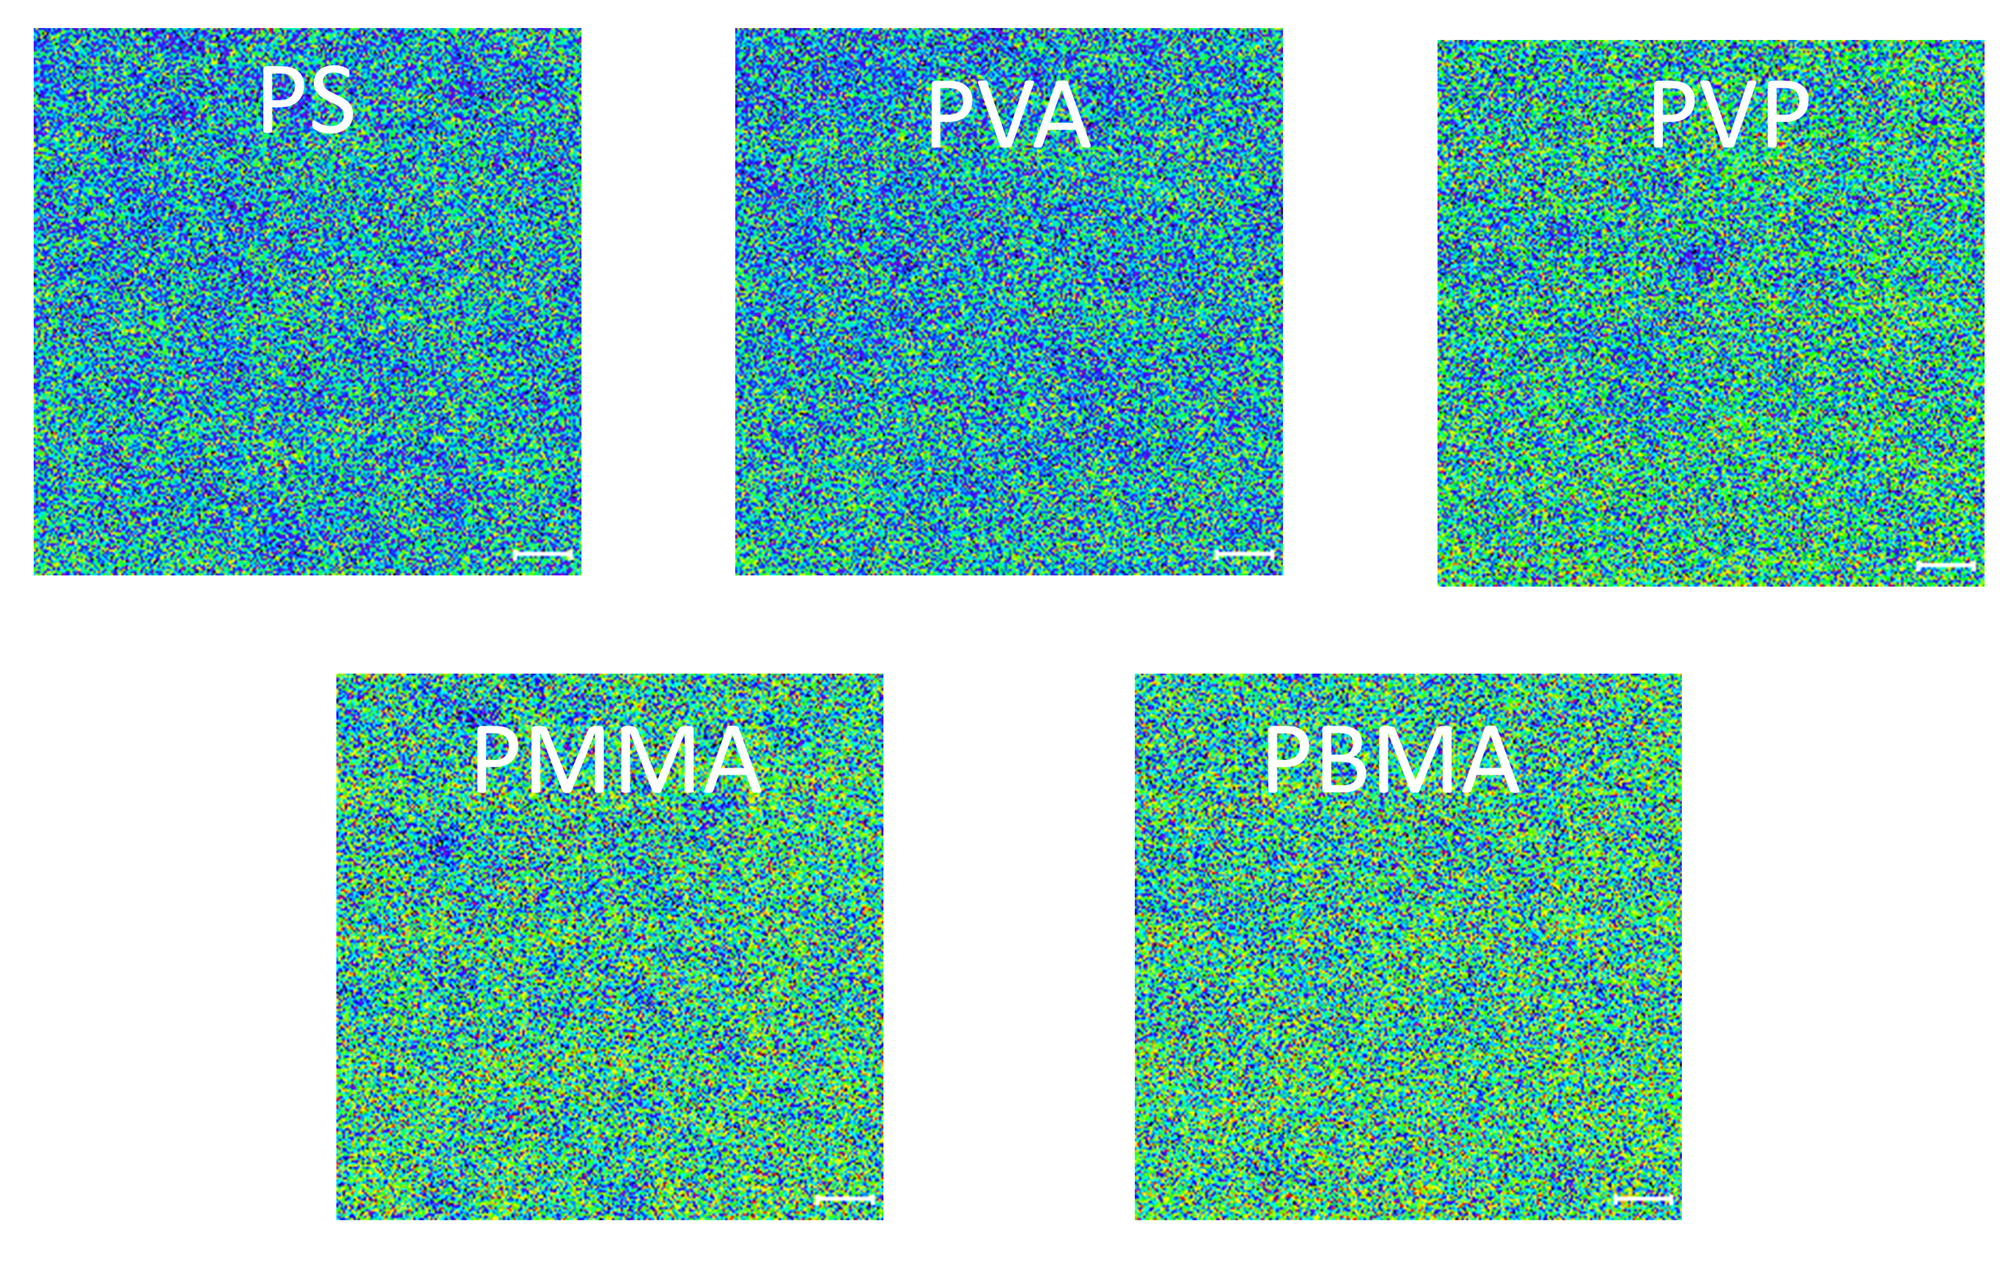


**Supplementary Figure 11. Surface I- content of polymer-modified MAPbI3 films.** The figure presents a quantitative comparison of iodine-related signals extracted from the top surface region of polymer-modified MAPbI3 films. The PBMA-modified heterostructure exhibits the weakest surface iodine enrichment, indicating that ester-carbonyl/Pb coordination in PBMA effectively limits photoinduced iodide accumulation at the top interface.


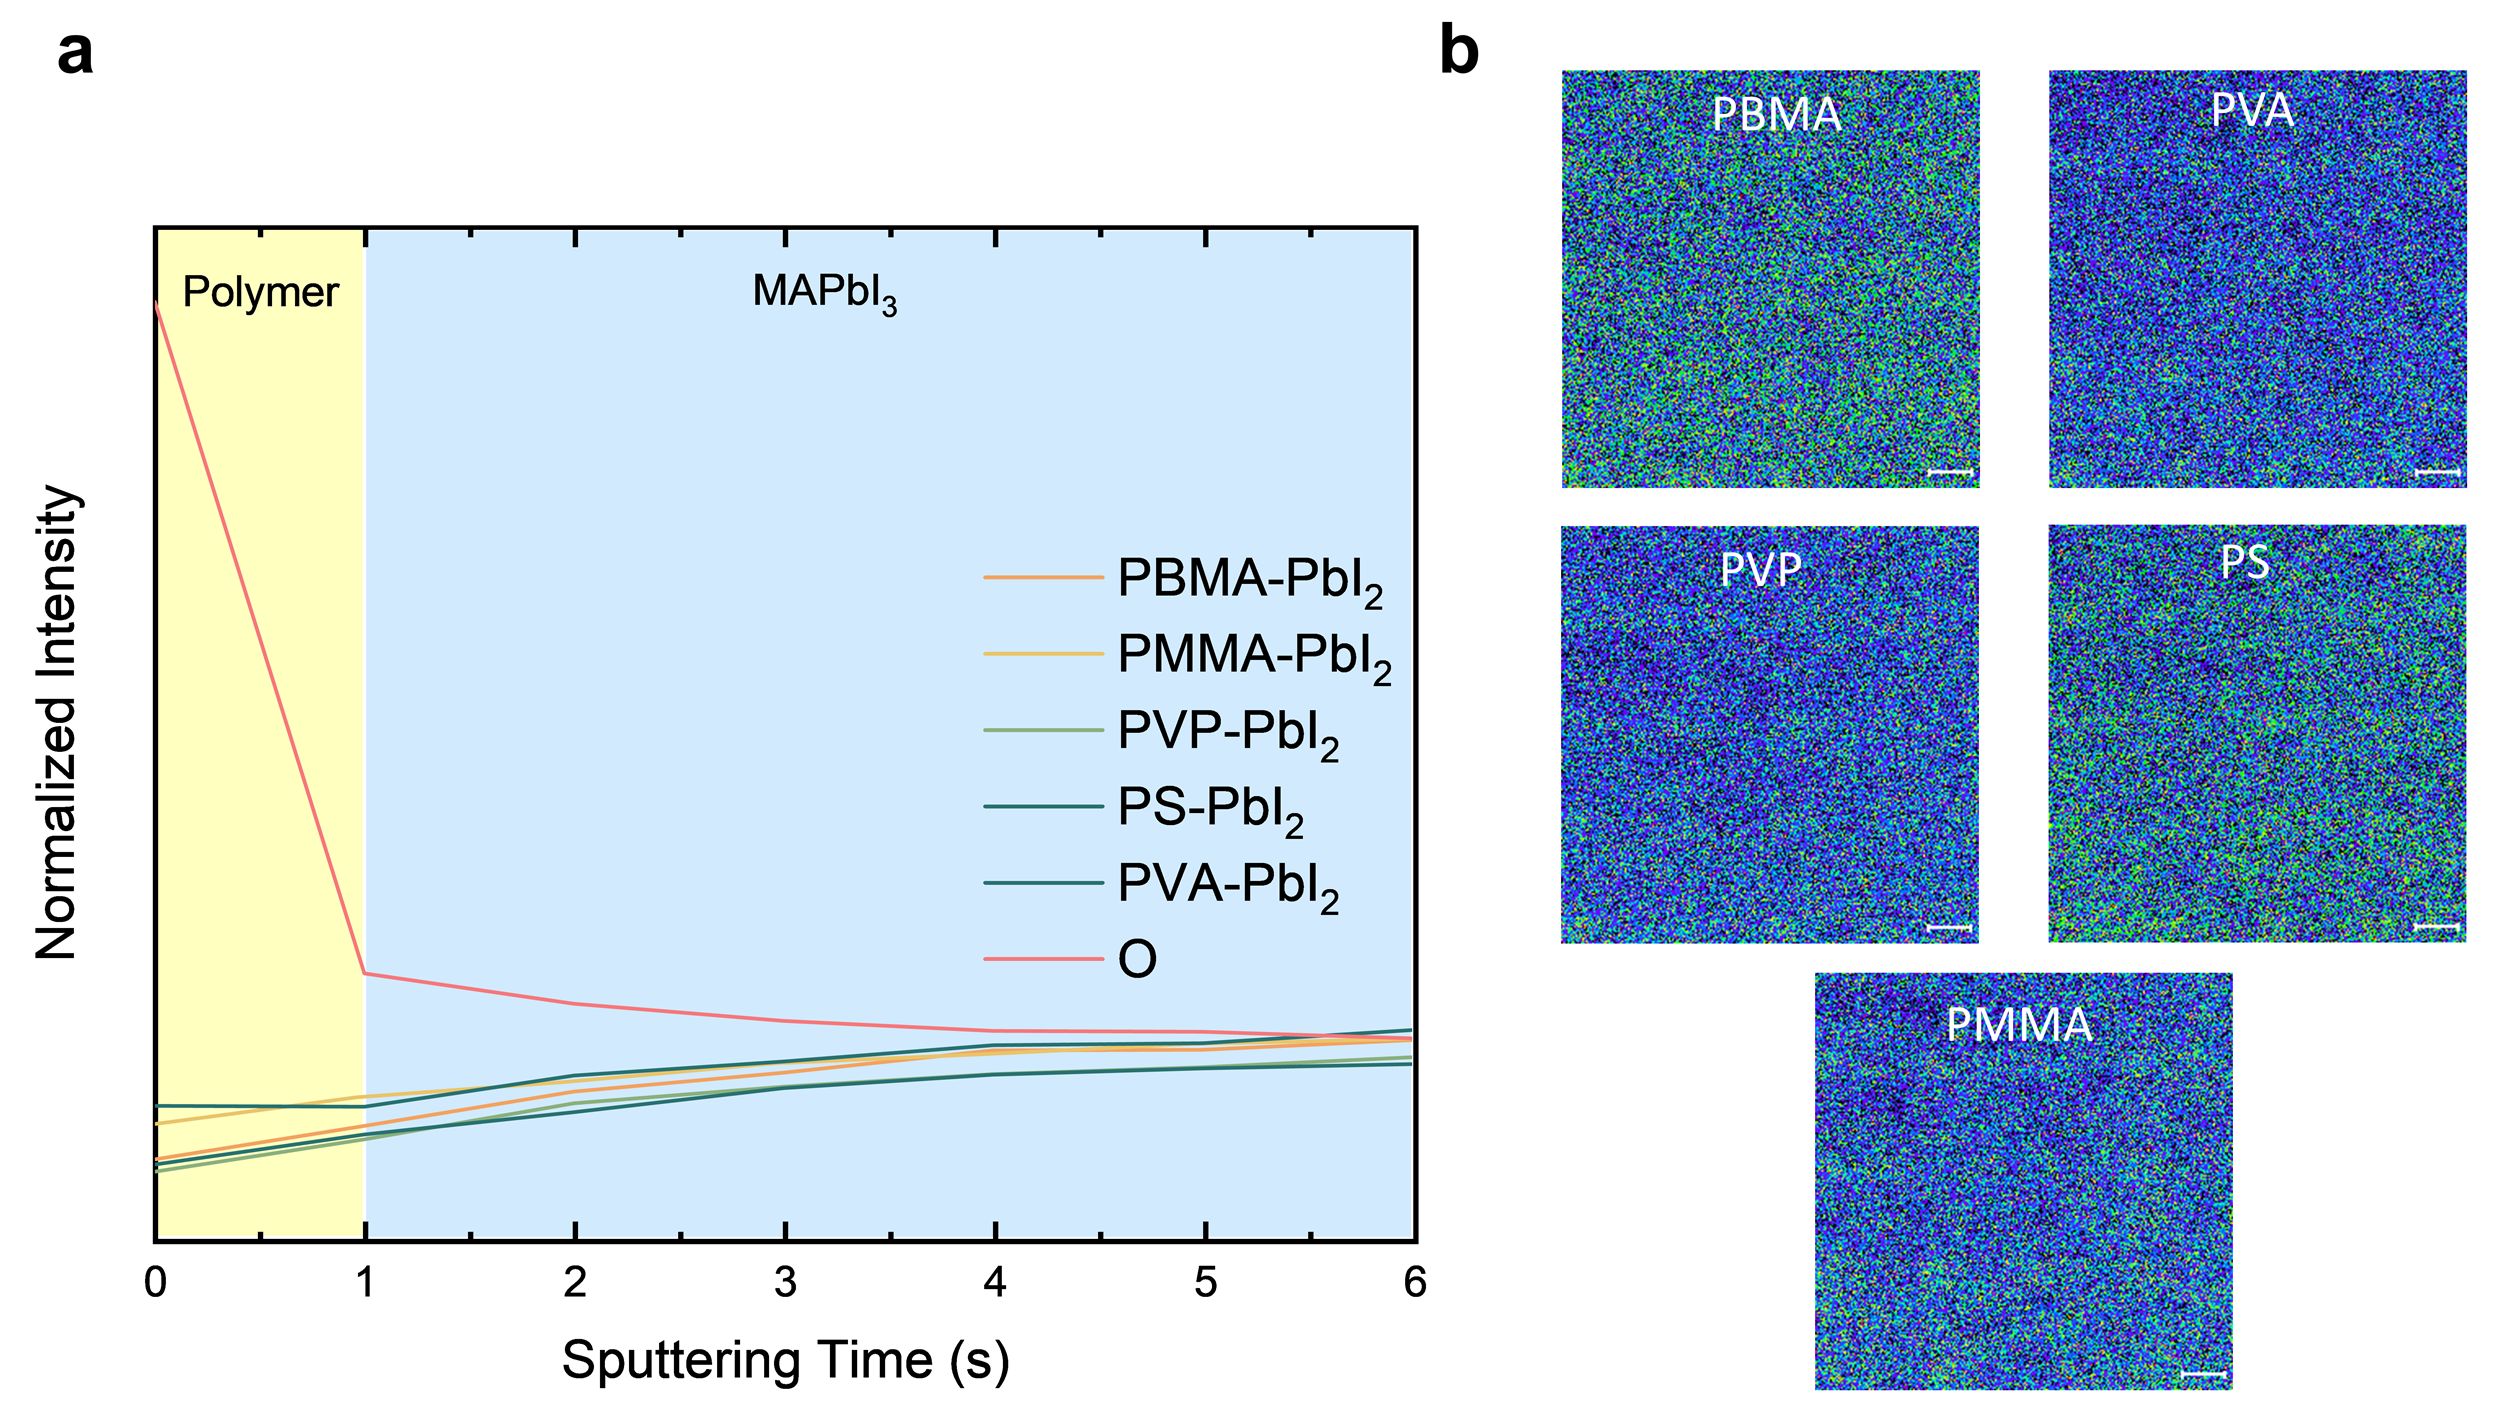


**Supplementary Figure 12. ToF-SIMS analysis of PbI2-related signals.** a) ToF-SIMS analysis of PbI2-related signals for the five polymer-modified heterostructures. b) Surface PbI2 content extracted from the corresponding ToF-SIMS data. PbI2-related signals were used to probe the Pb-associated distribution. The negligible difference among the different systems indicates that Pb-related ionic migration is not the dominant factor governing the relaxation dynamics of photogenerated electrons.


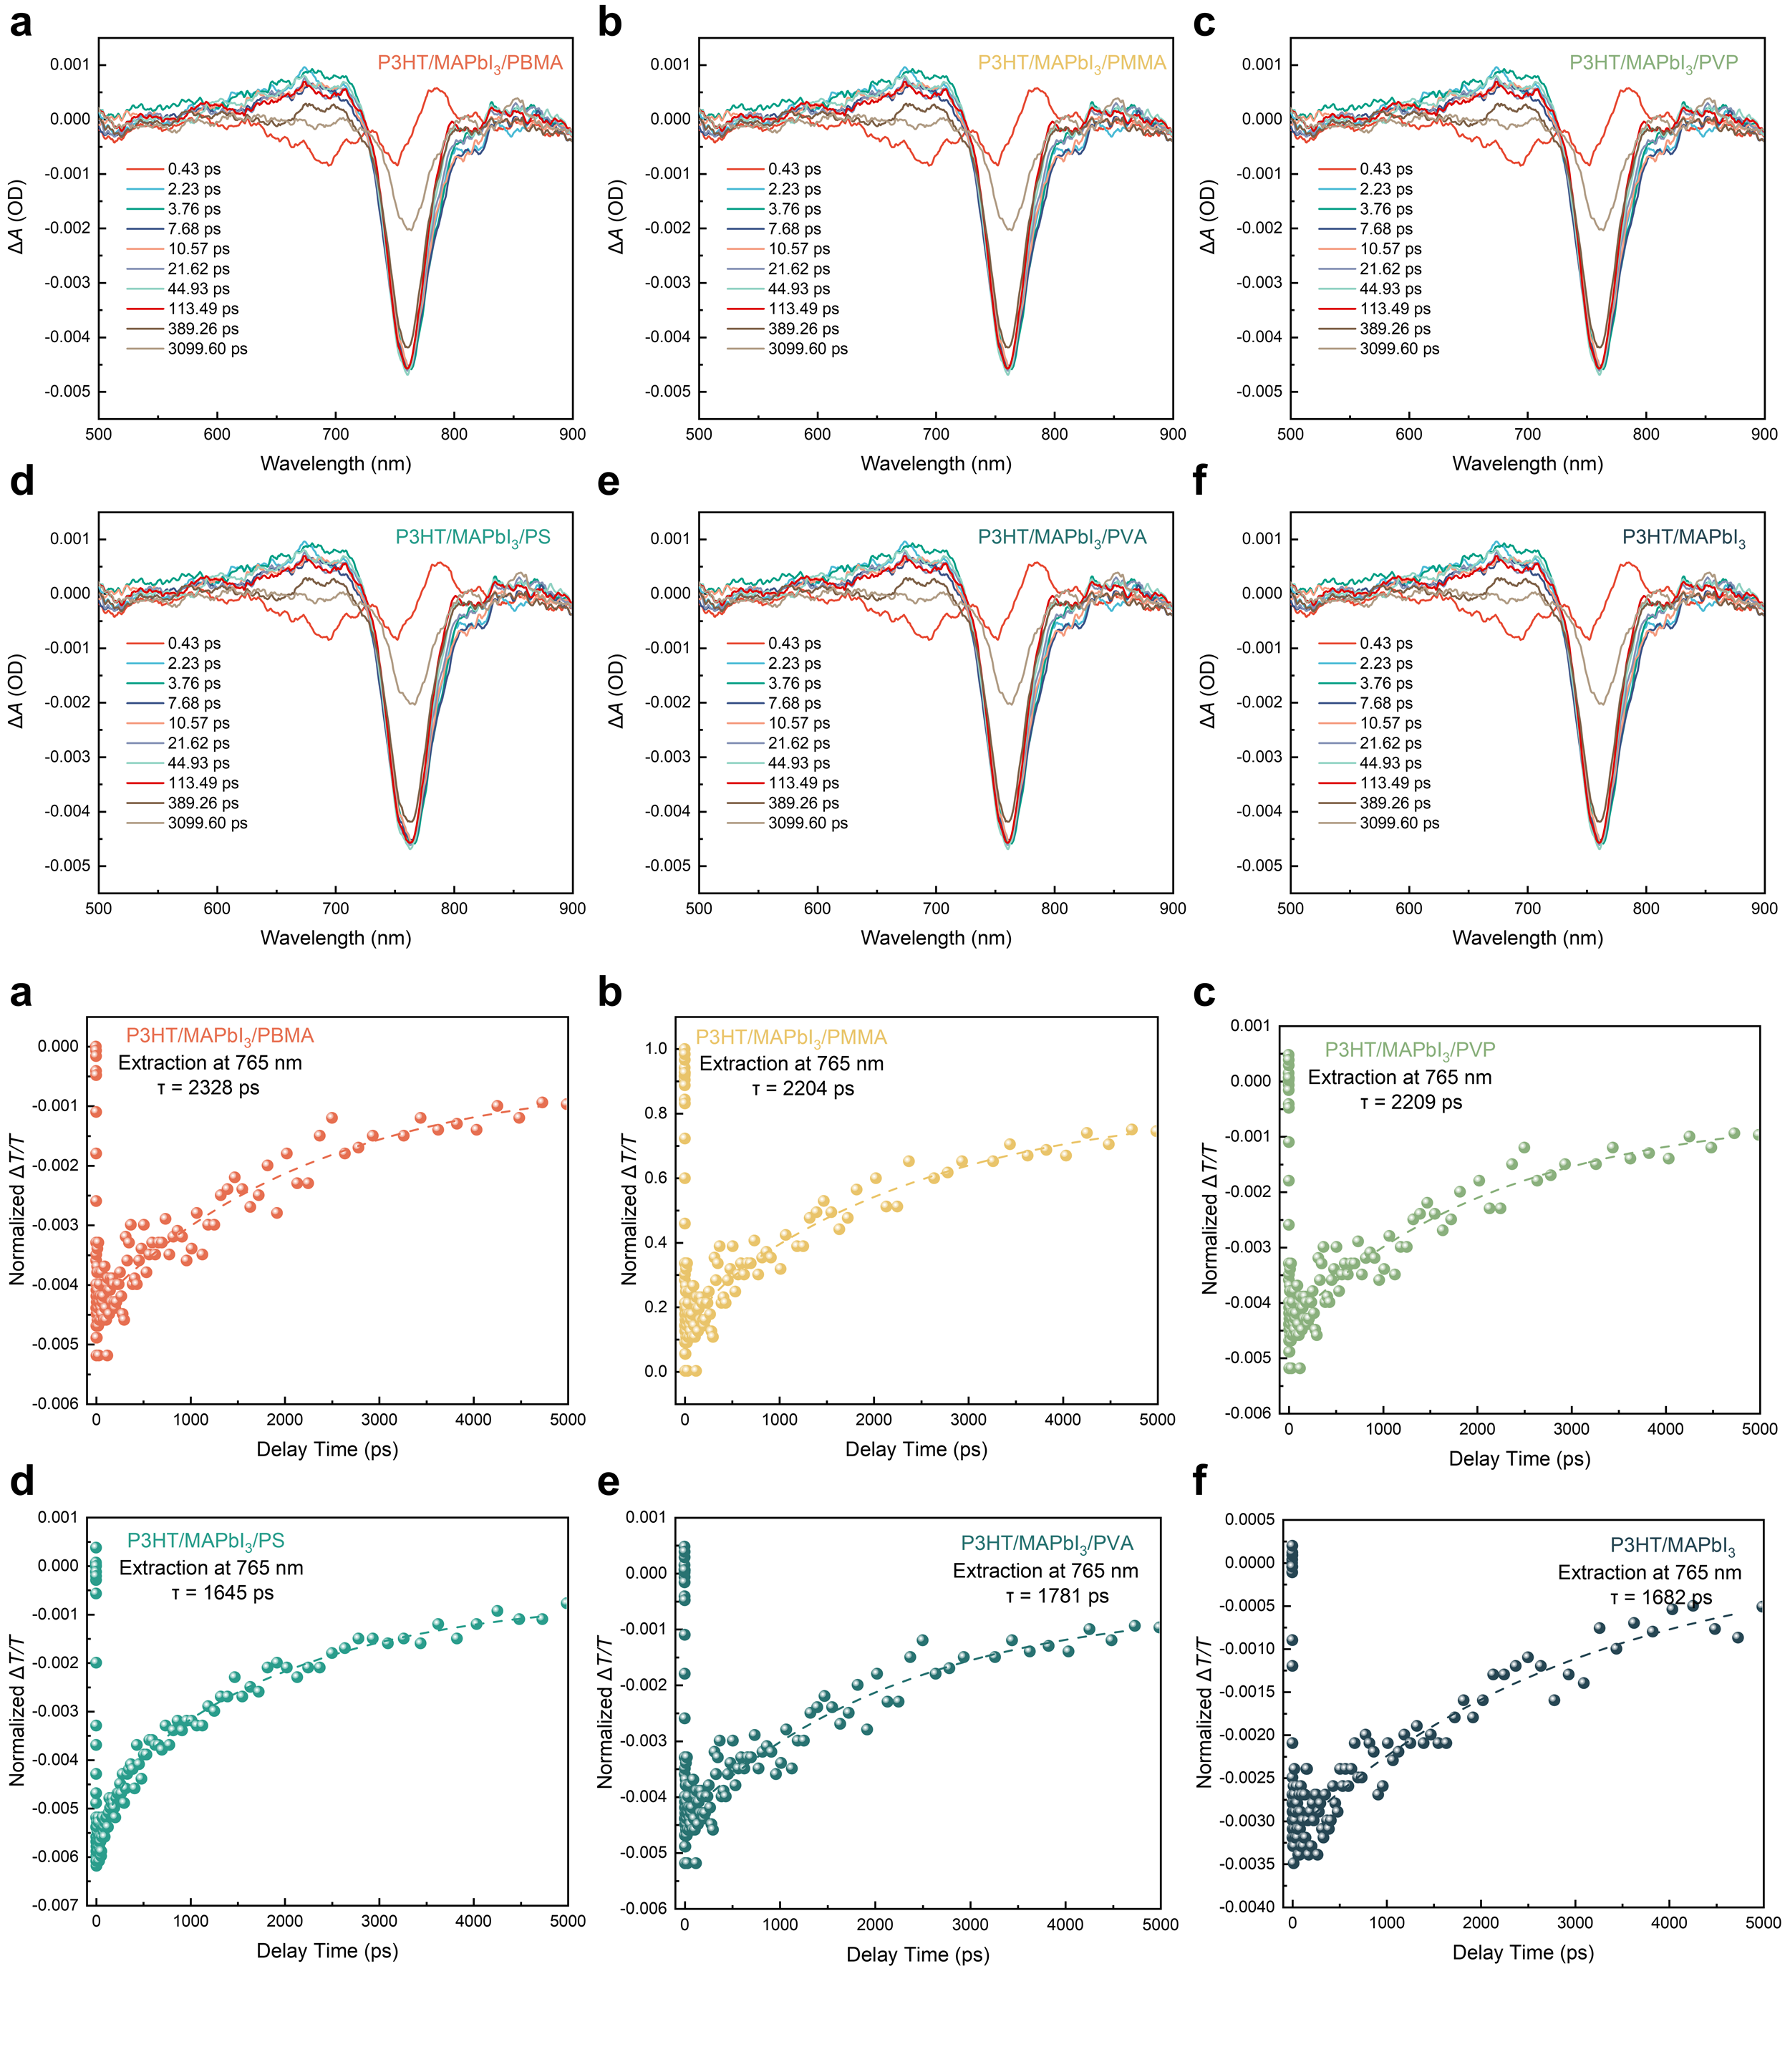


**Supplementary Figure 13. Transient absorption spectra of pristine and polymer-modified MAPbI3 films.** Transient absorption spectra of pristine MAPbI3 and MAPbI3 films modified with PVA, PS, PVP, PMMA and PBMA top layers, showing the polymer-dependent evolution of photogenerated carrier relaxation. Compared with the hydroxyl-, phenyl- and lactam-carbonyl-based interfaces, ester-carbonyl-containing PMMA and PBMA prolong the photoinduced spectral response, indicating that Pb-coordinating ester carbonyls more effectively regulate interfacial carrier recovery. Among the polymer series, the PBMA-modified MAPbI3 film exhibits the slowest photocarrier relaxation, consistent with a top recovery interphase in which ester-carbonyl/Pb coordination stabilizes the Pb-I framework and the butyl side-chain environment delays electron-side recovery. These results indicate that the MAPbI3/polymer top interface modulates photocarrier relaxation rather than acting as an optically inert encapsulation layer.


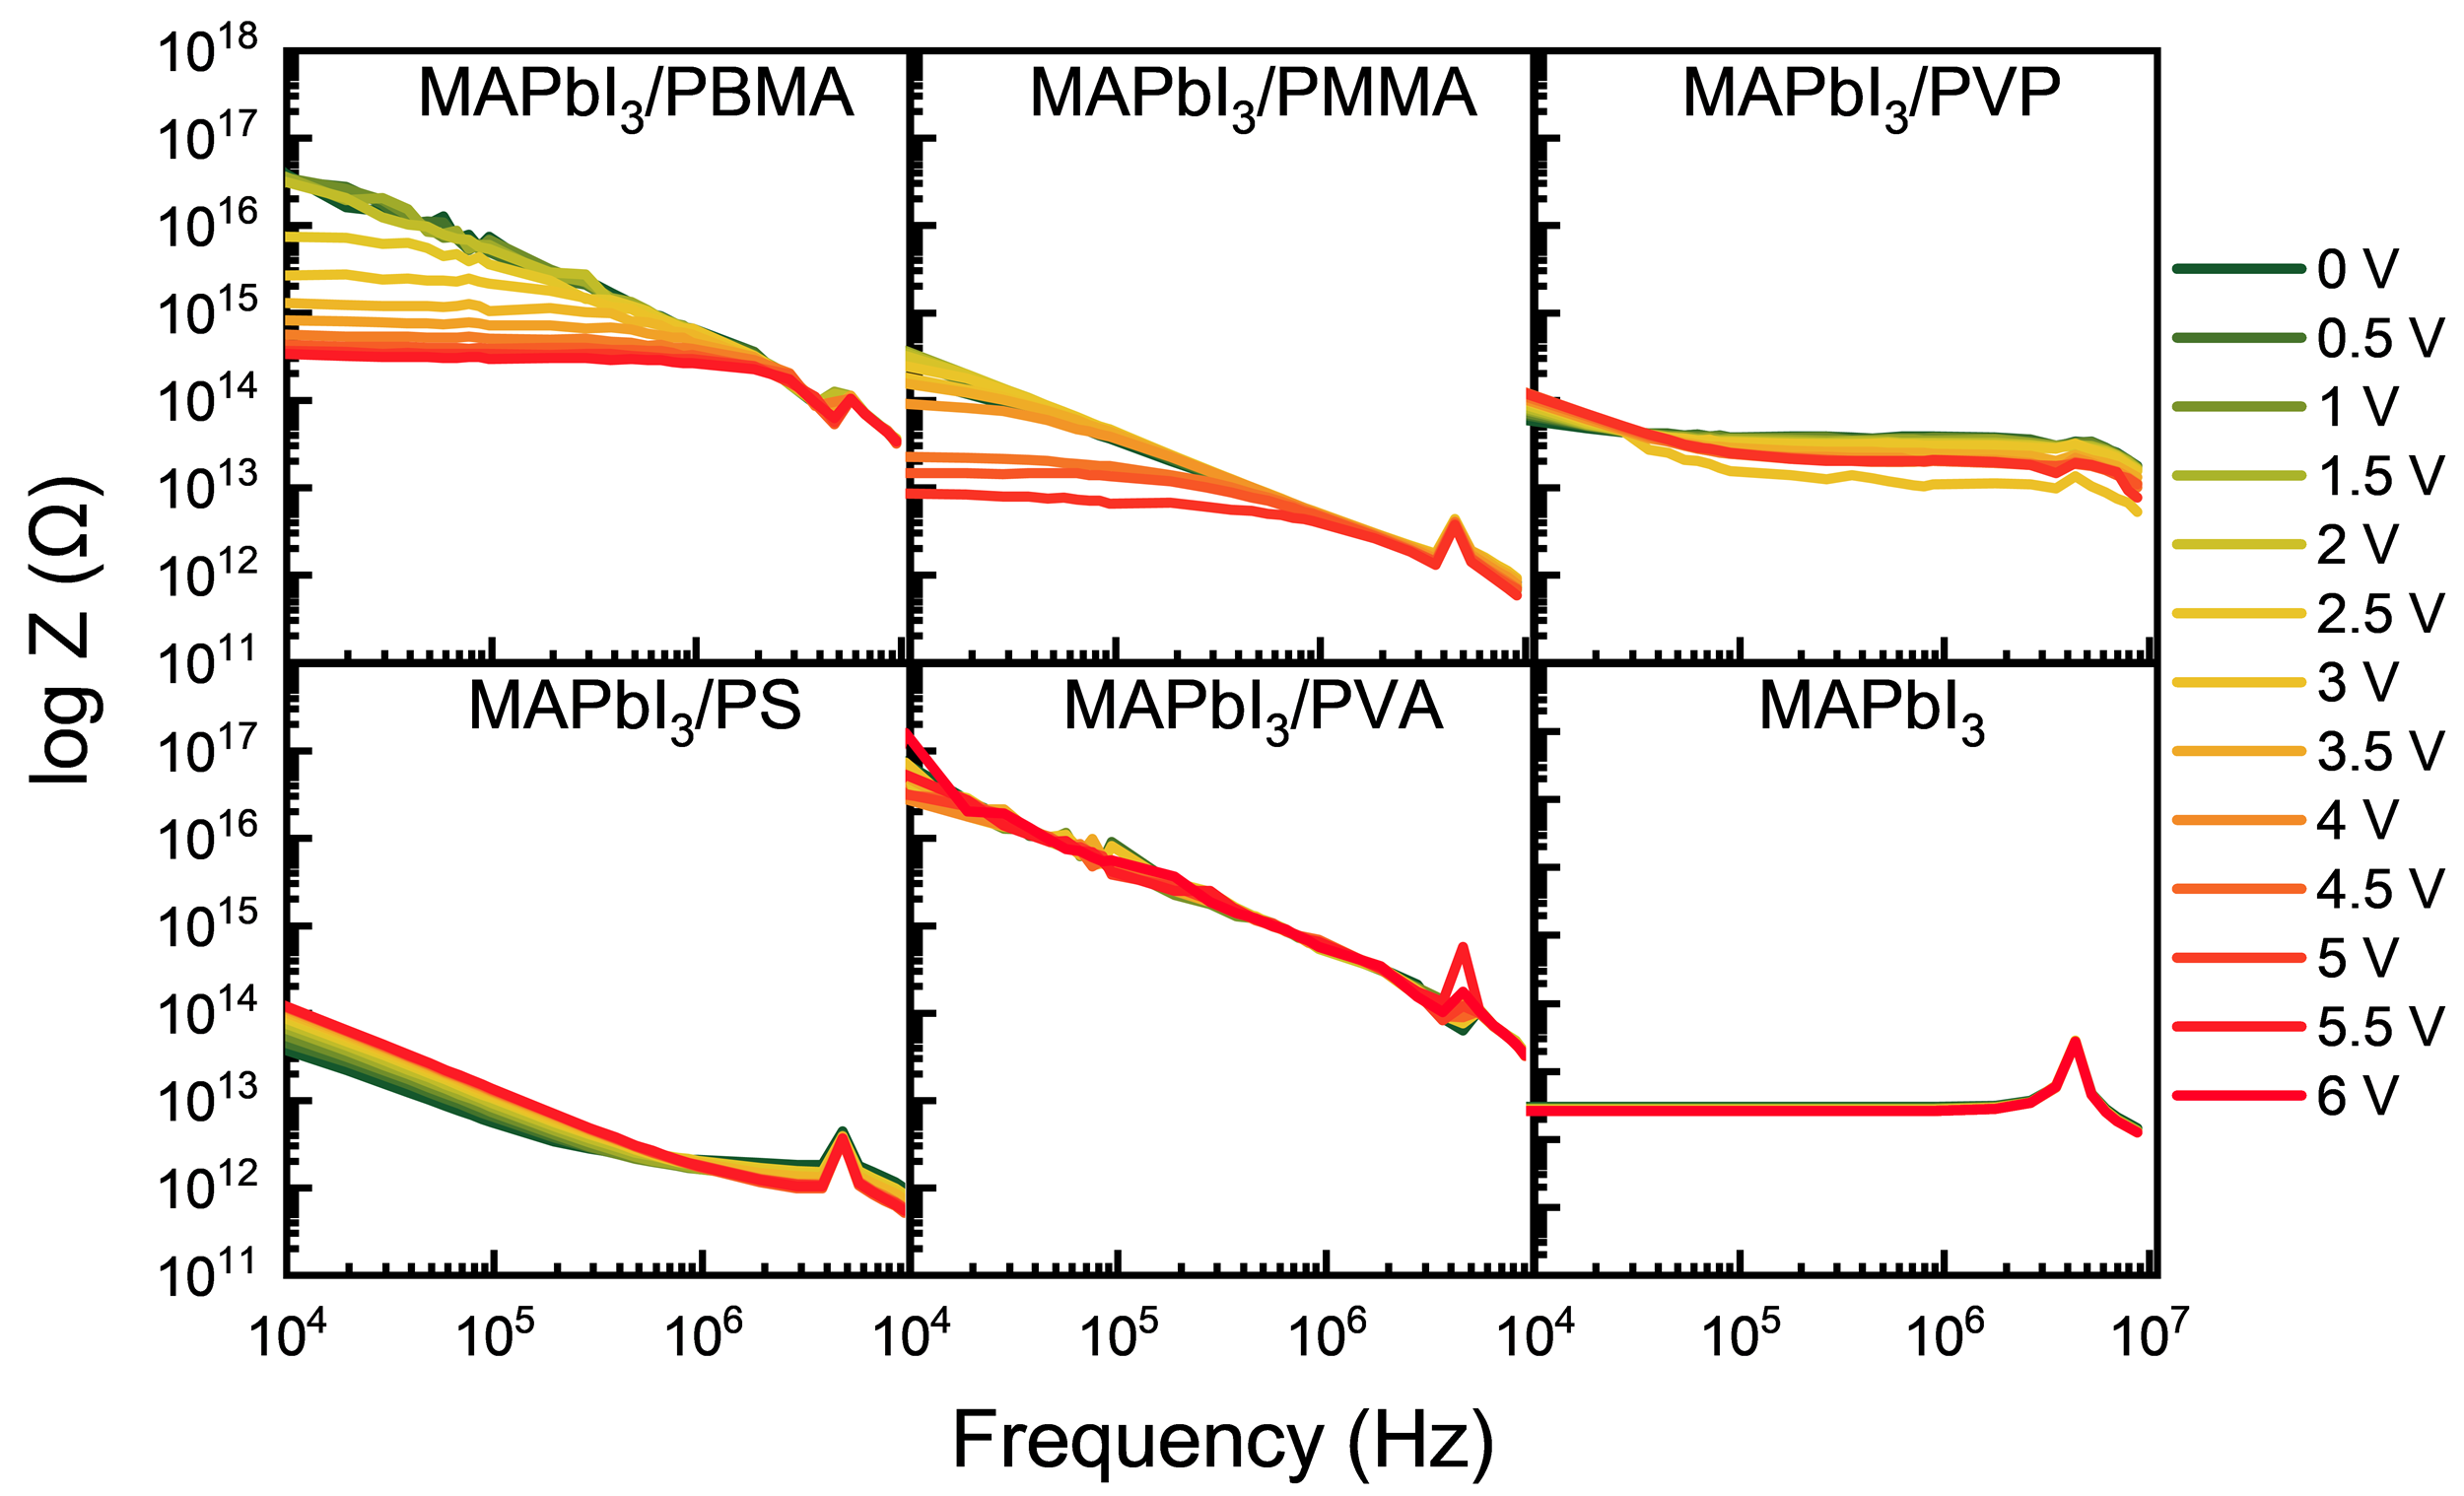


**Supplementary Figure 14. Multiscale impedance analysis of complete devices.** The Supplementary Figure shows frequency- and voltage-dependent impedance responses of ITO/P3HT/MAPbI3/polymer/Ag devices with different polymer top layers, displaying the electrical relaxation behaviours of the complete device structures. The frequency-domain response separates fast electronic transport from slower interfacial polarization, trap charging and ion-mediated relaxation, revealing a more stable transition behaviour for the PBMA-based device.


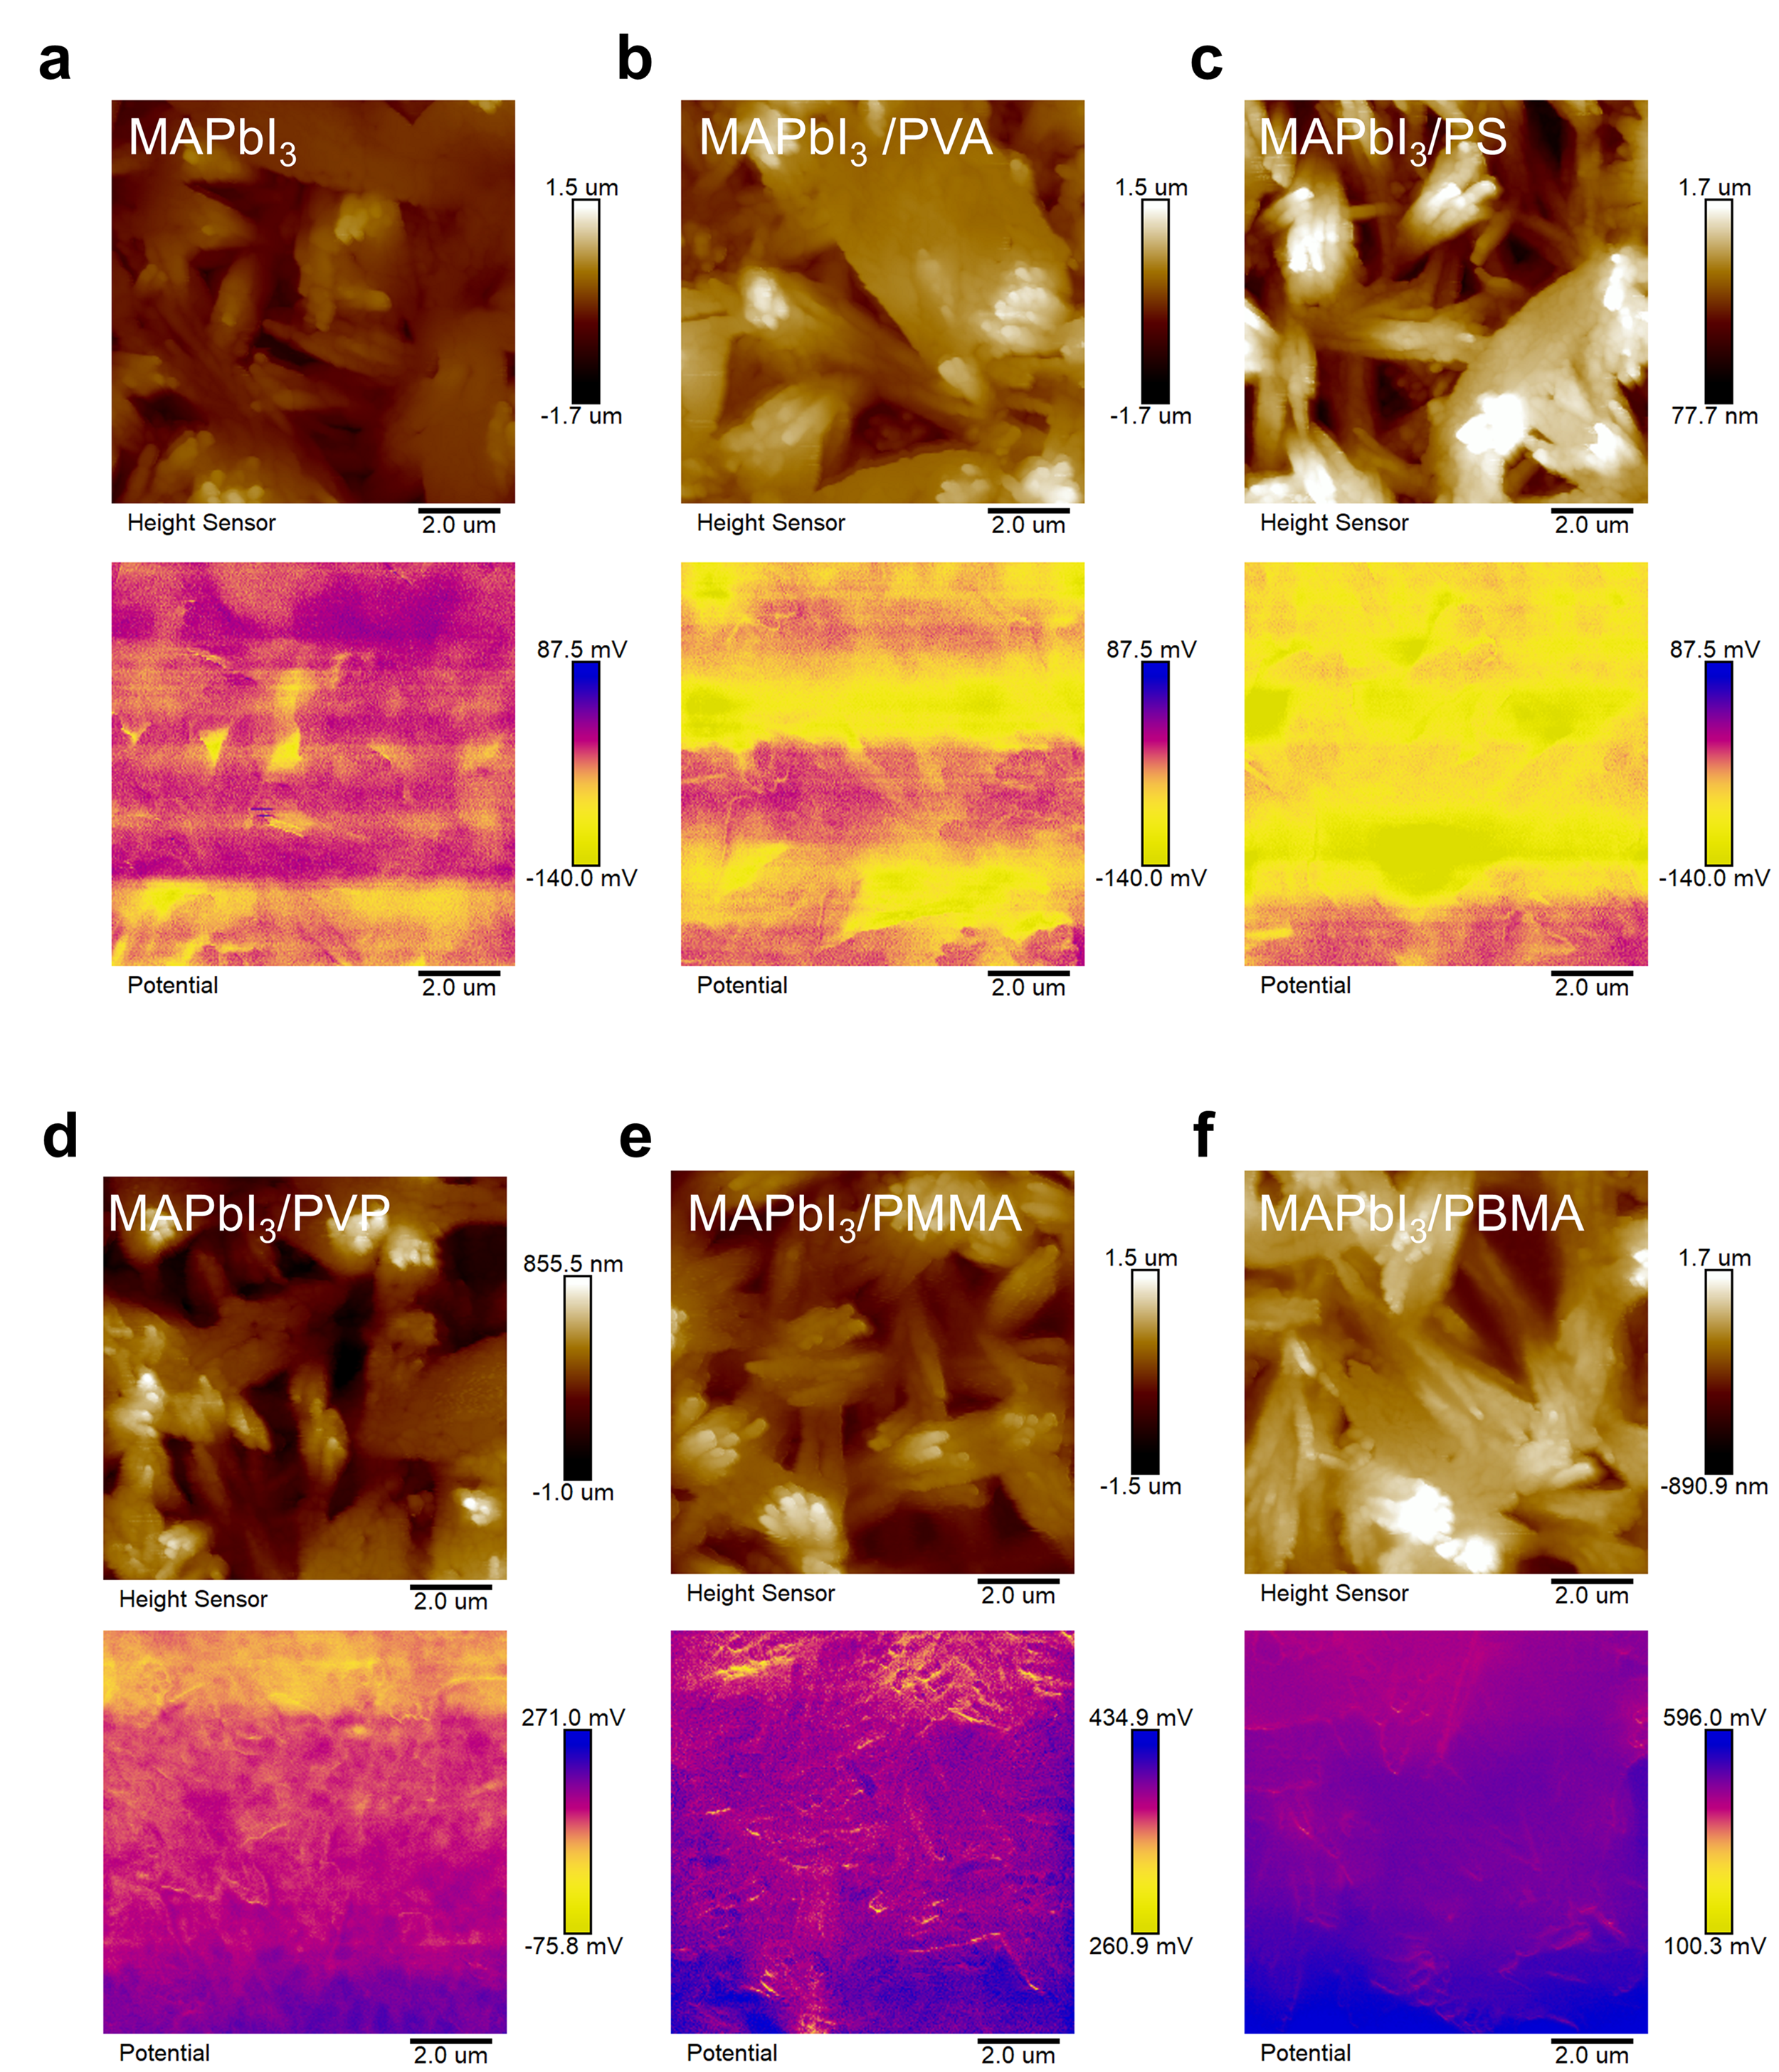


**Supplementary Figure 15. KPFM measurements of pristine and polymer-modified MAPbI3 films.** The Supplementary Figure shows KPFM surface-potential maps of pristine MAPbI3 and MAPbI3 films modified with PVA, PS, PVP, PMMA and PBMA top layers.


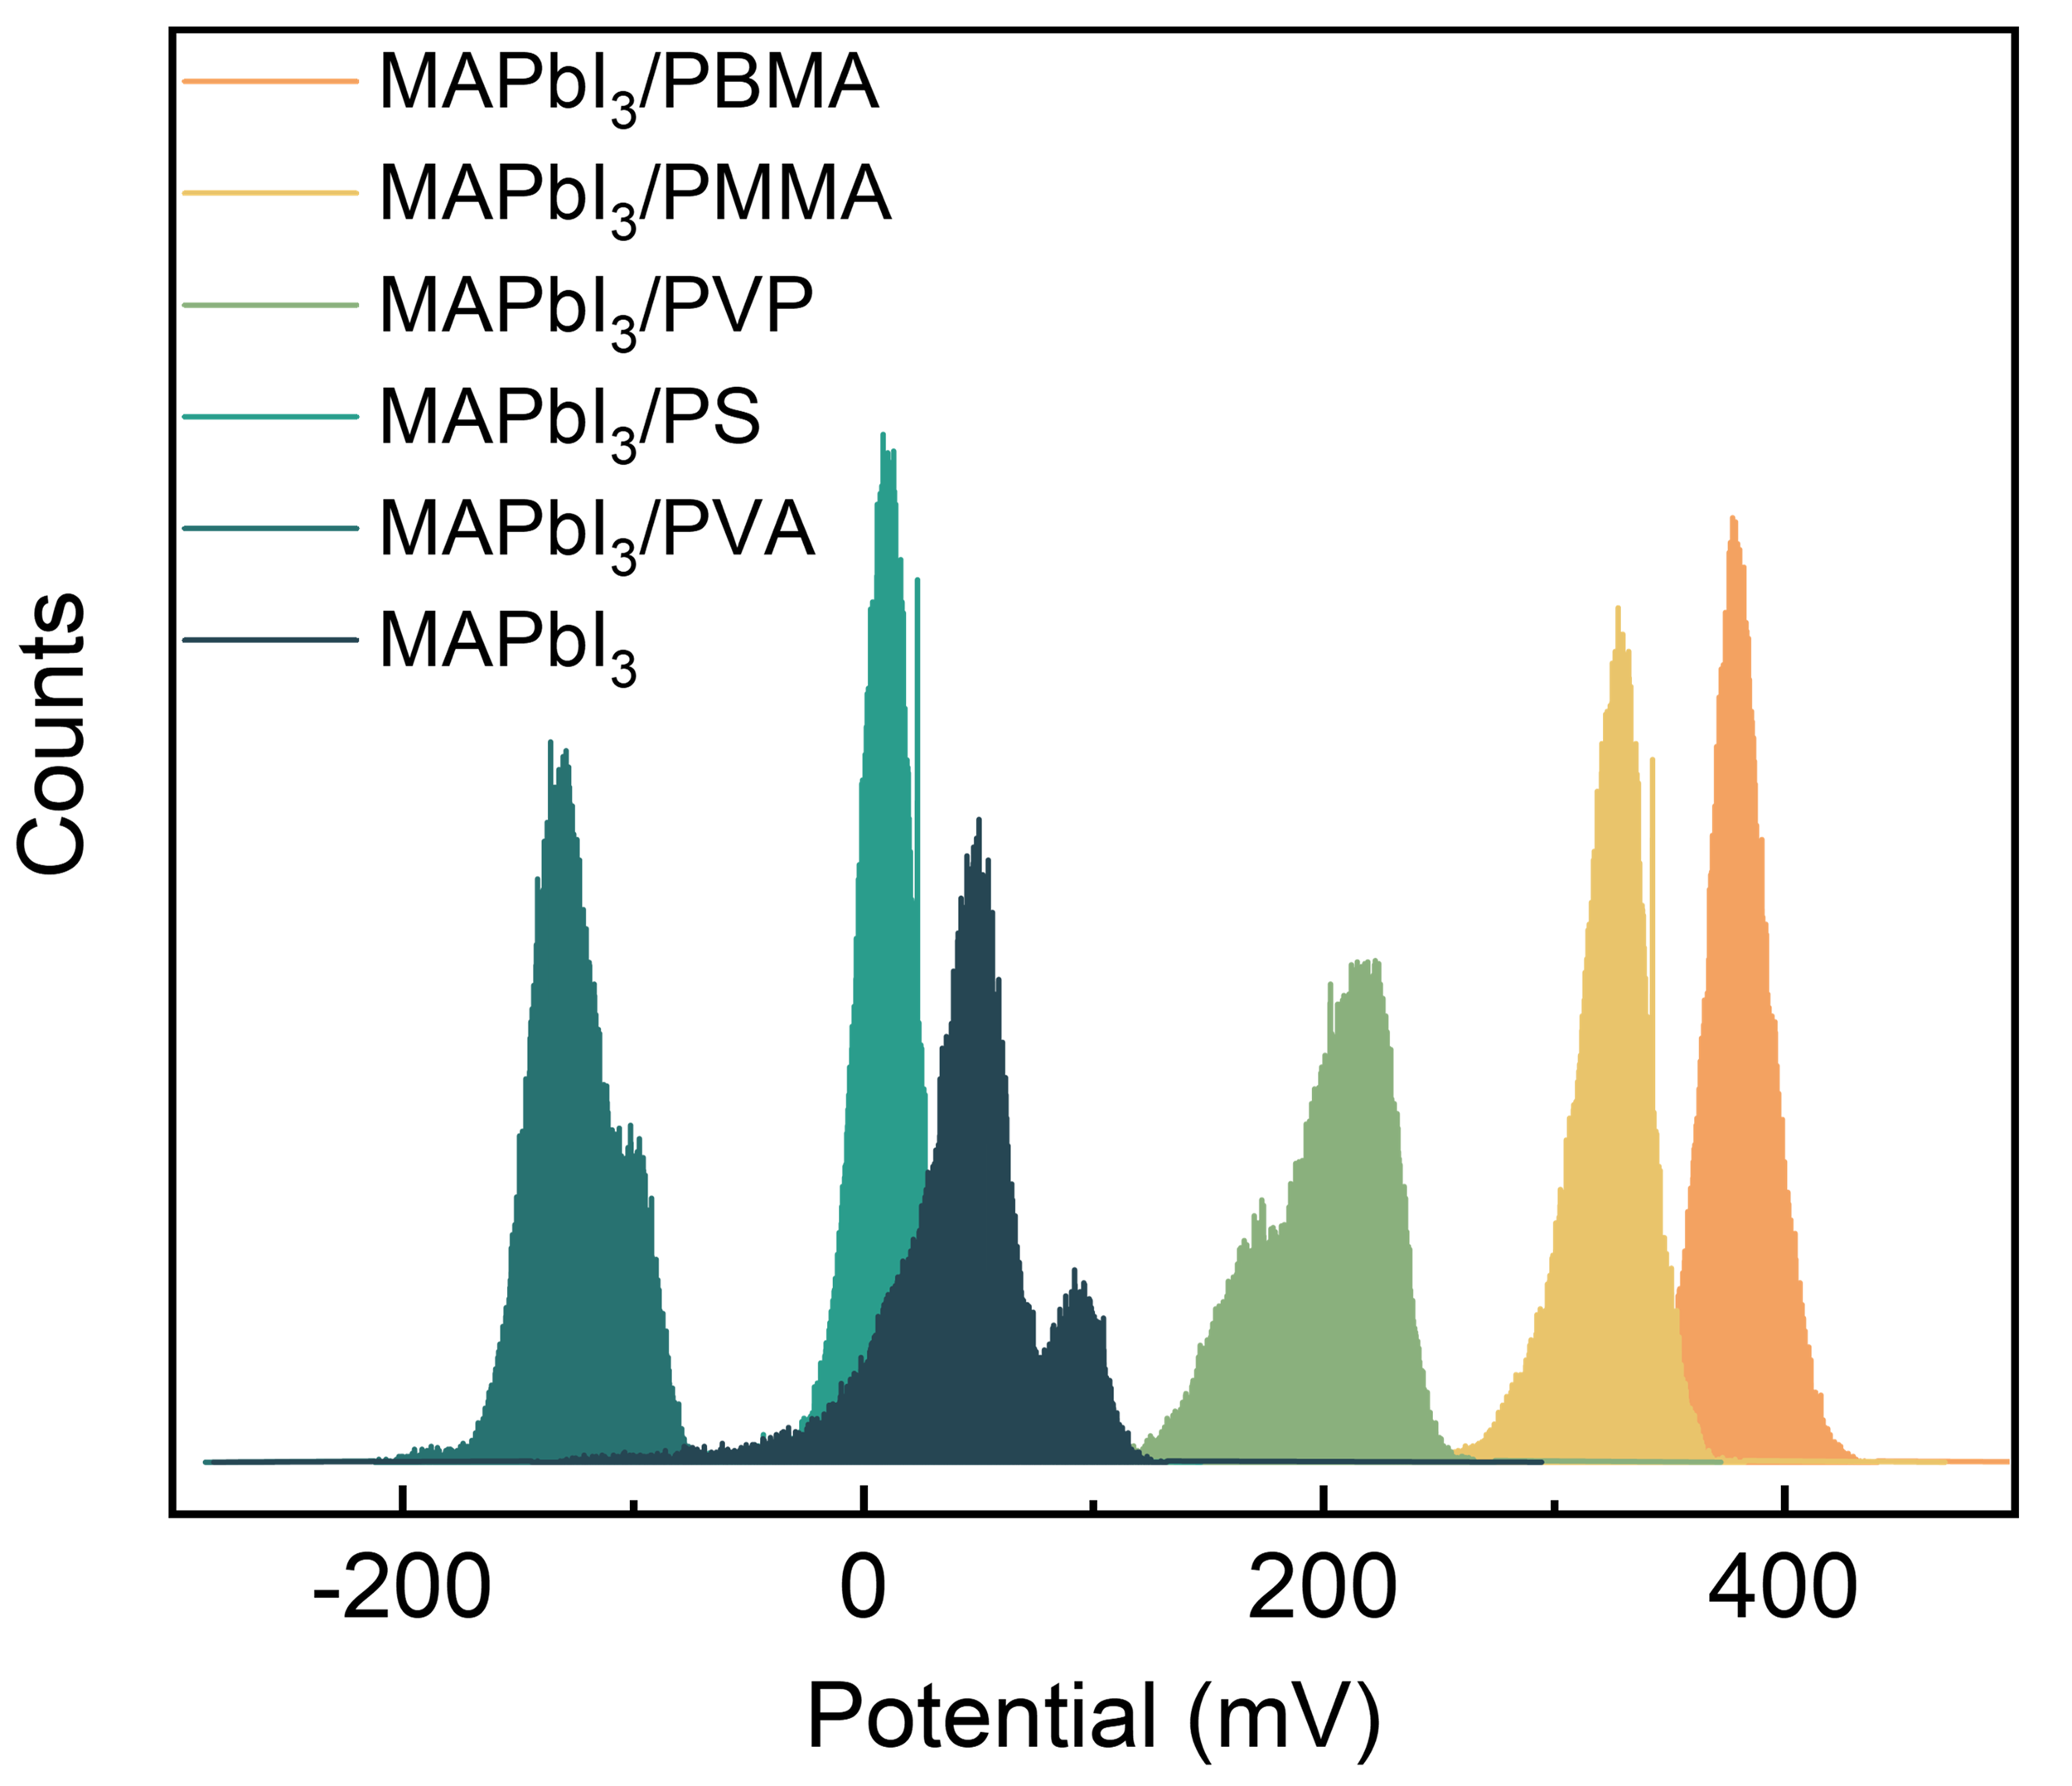


**Supplementary Figure 16. Surface-potential statistics from KPFM measurements.** The figure presents statistical distributions of surface potential extracted from the KPFM measurements shown in Supplementary Figure 15. A notable shift toward more positive surface potentials is observed in PBMA-based device, indicating that the PBMA top layer effectively suppresses iodide migration toward the MAPbI3 surface.


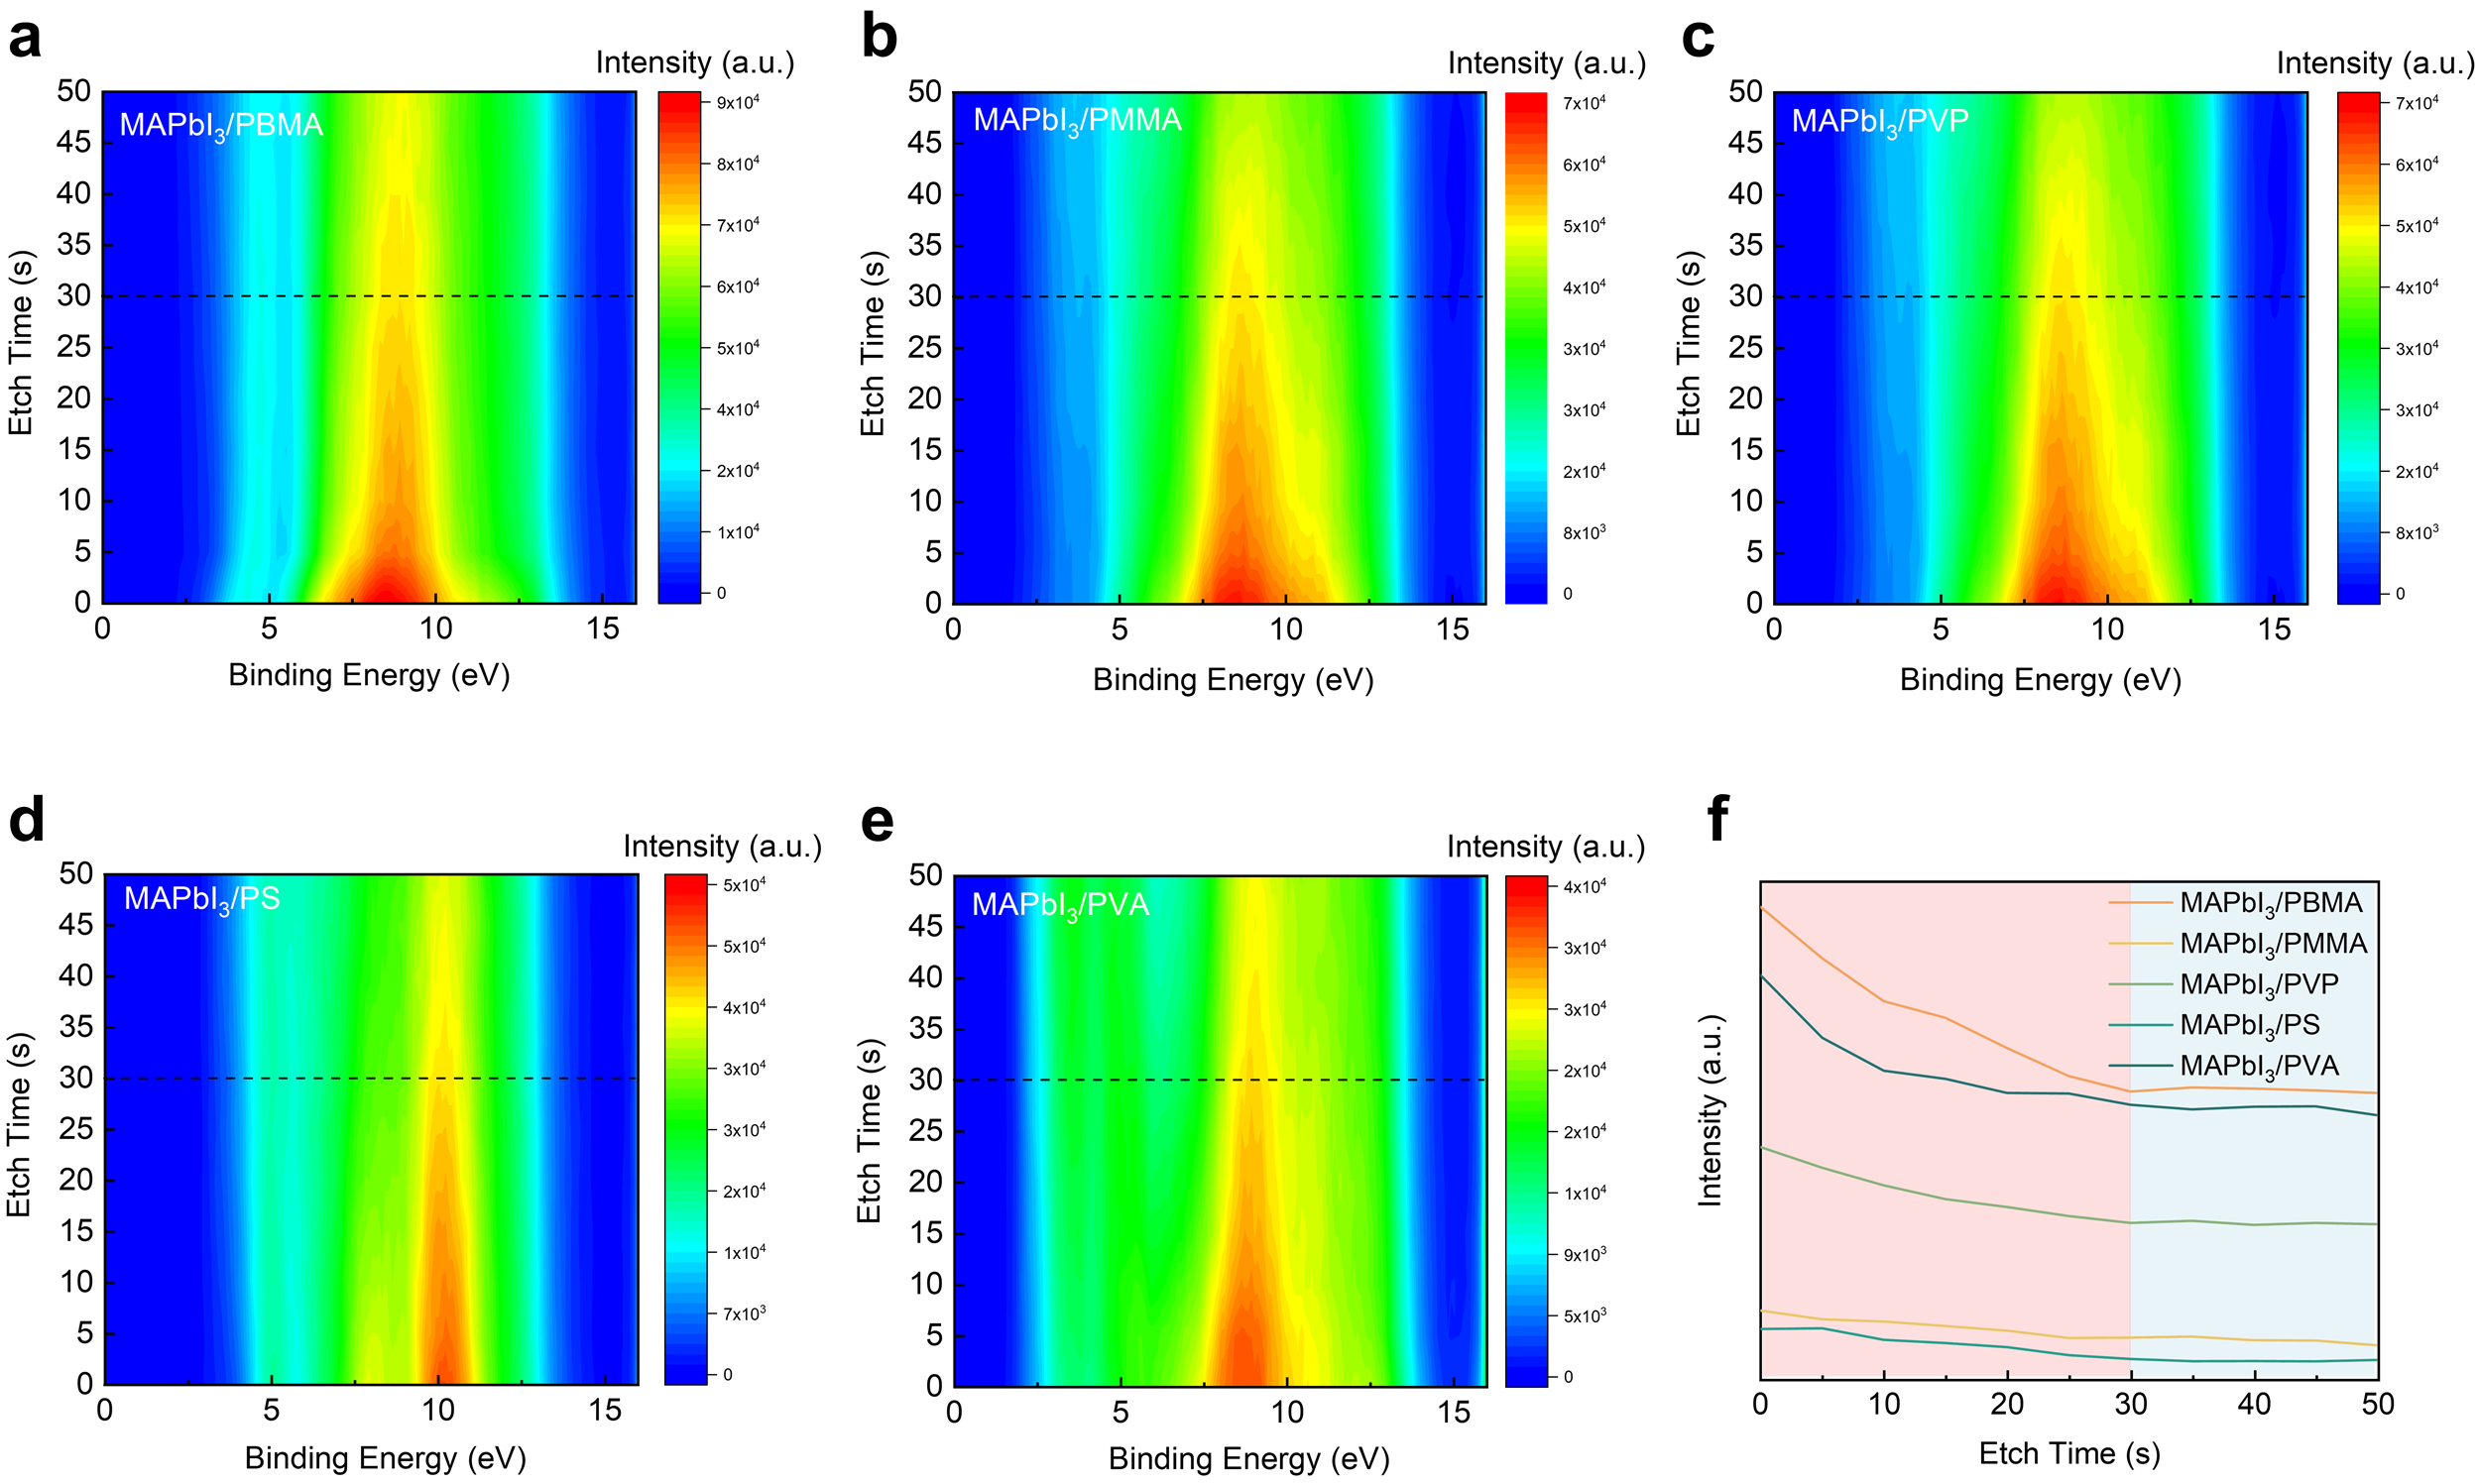


**Supplementary Figure 17. Depth-resolved ultraviolet photoelectron spectroscopy (UPS) of MAPbI3/polymer.** a-e) Depth-resolved UPS spectral maps of MAPbI3/PBMA, MAPbI3/PMMA, MAPbI3/PVP, MAPbI3/PS and MAPbI3/PVA top interfaces. f) Intensity profiles extracted at 9 eV from a-e. The black dashed lines indicate the polymer/MAPbI3 interfacial region, where the abrupt spectral transition marks the change from the polymer overlayer to the perovskite layer. The polymer-dependent spectral offsets reveal distinct occupied-state redistribution and interfacial energy-level alignment, supporting the energy-band analysis in Supplementary Fig. 19.


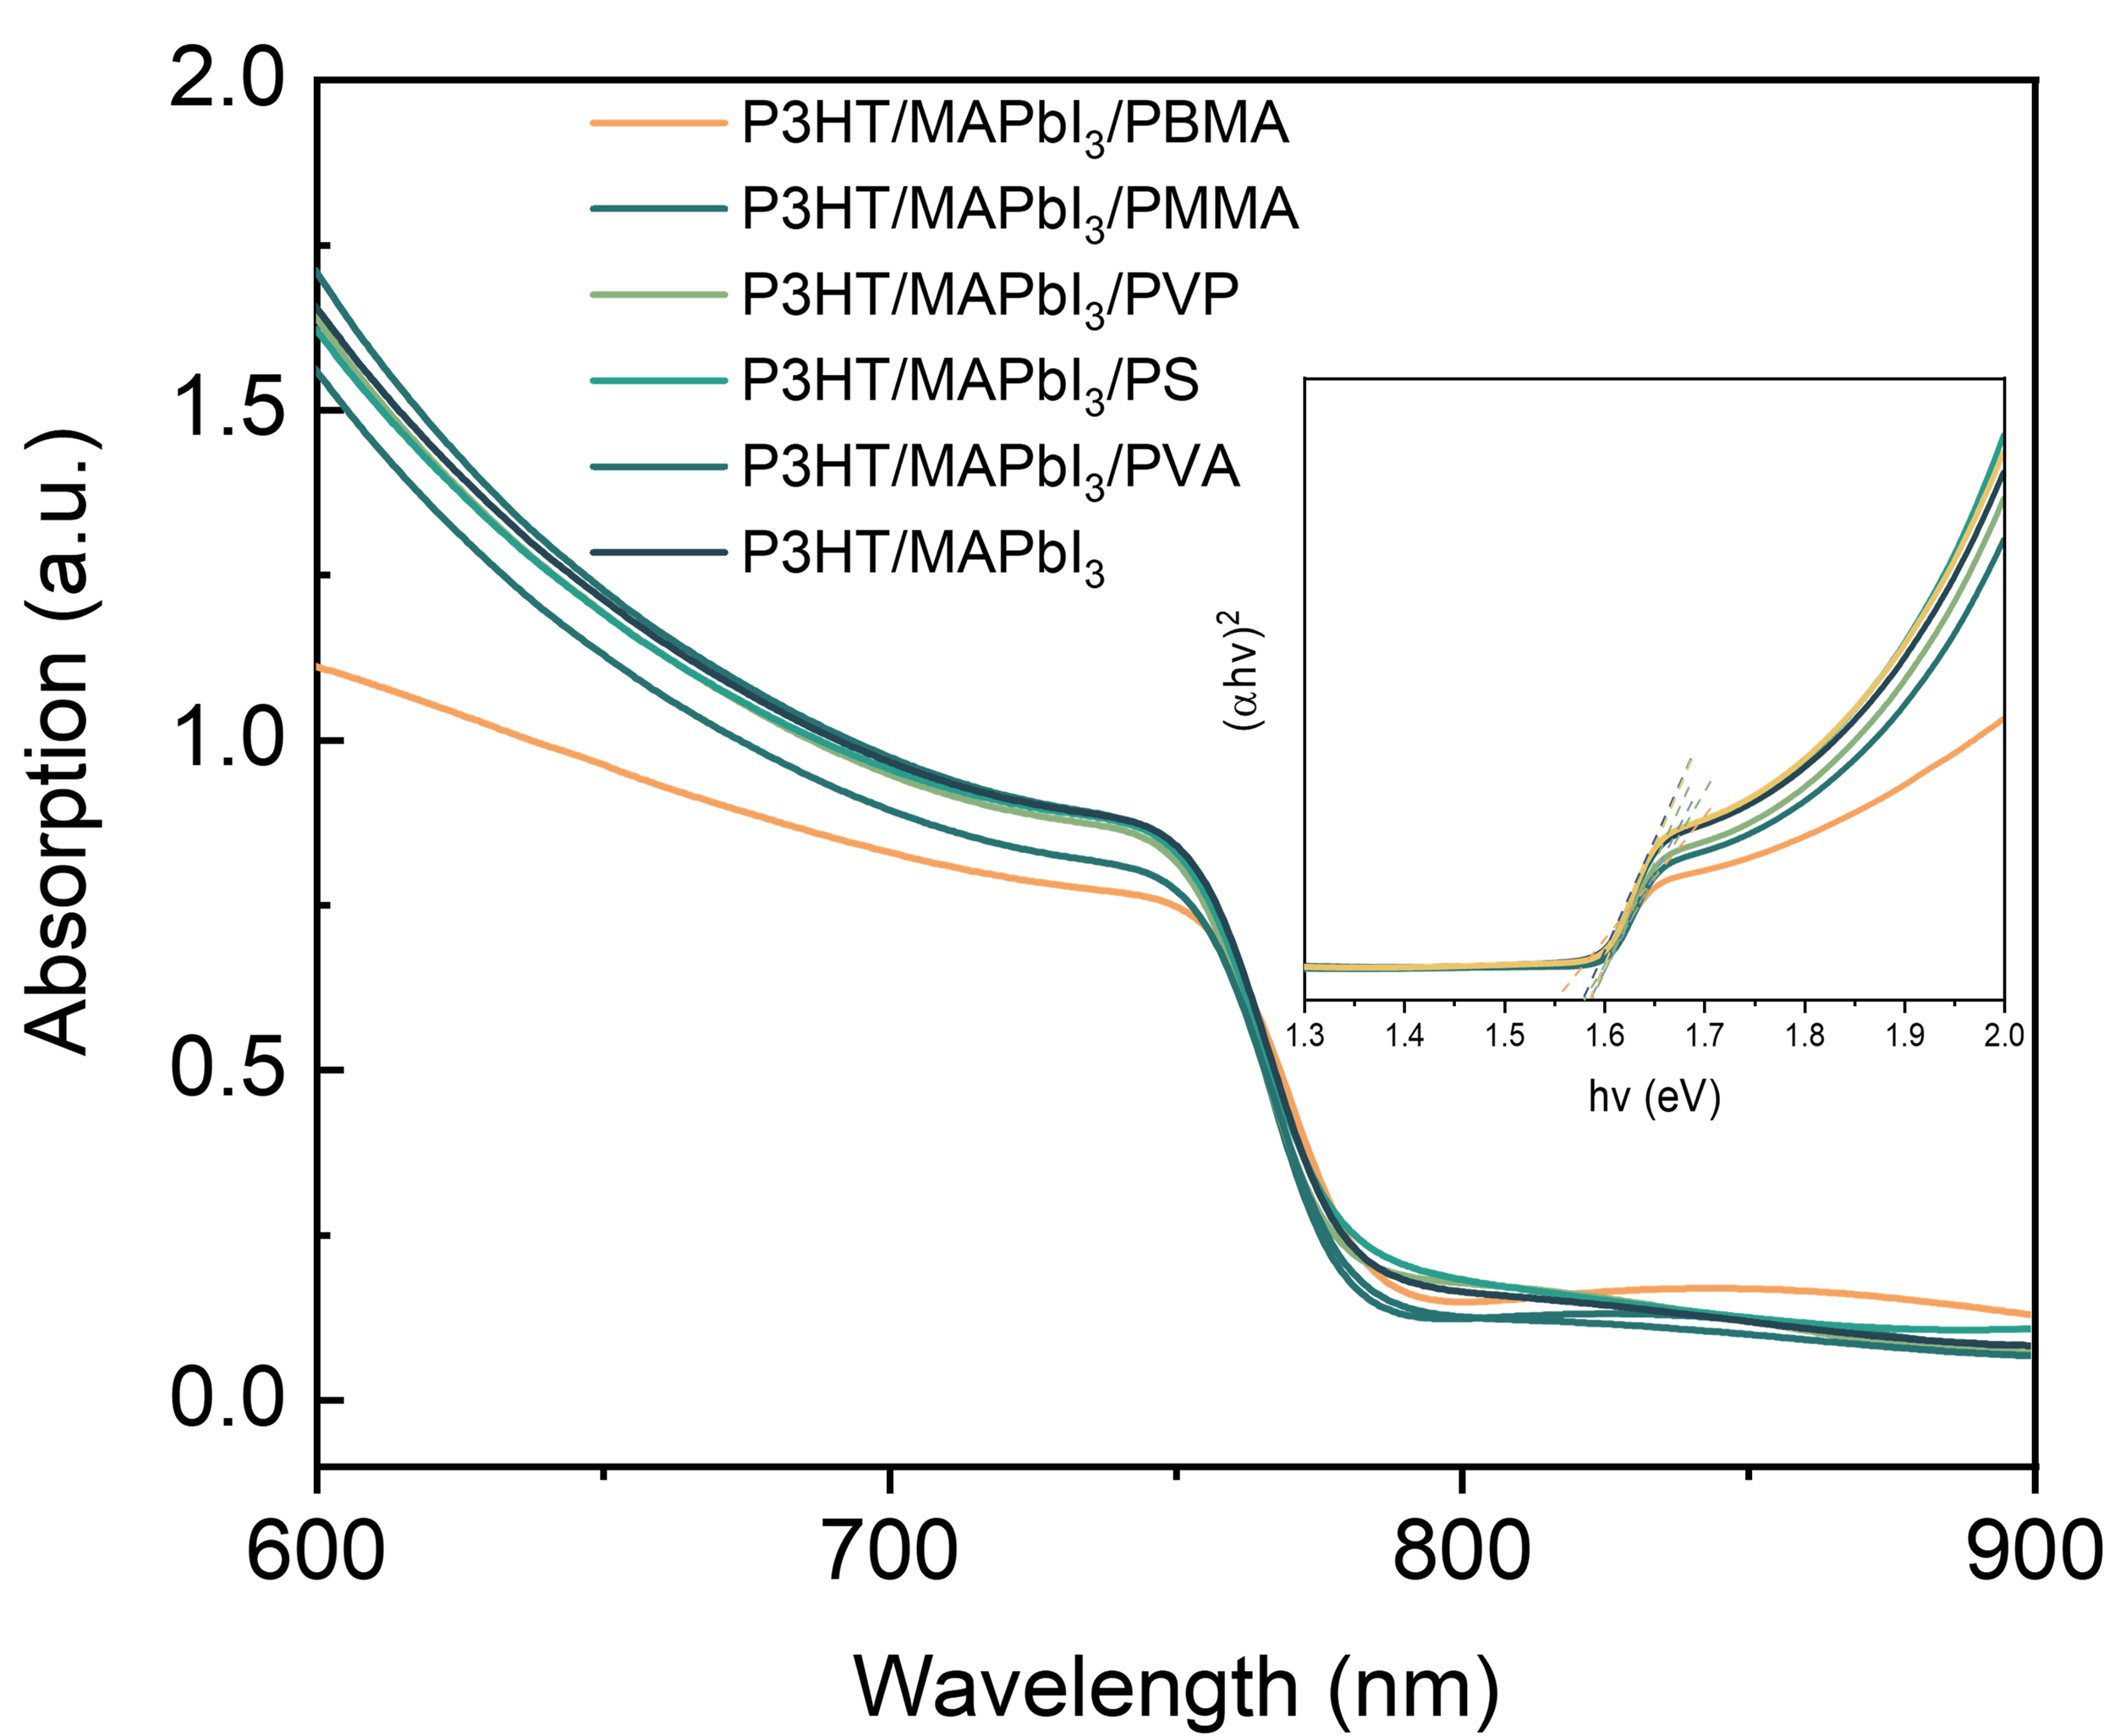


**Supplementary Figure 18. UV-vis absorption spectra of polymer-modified MAPbI3 films.** The Supplementary Figure shows absorption spectra of MAPbI3 films modified with different polymer top interface.


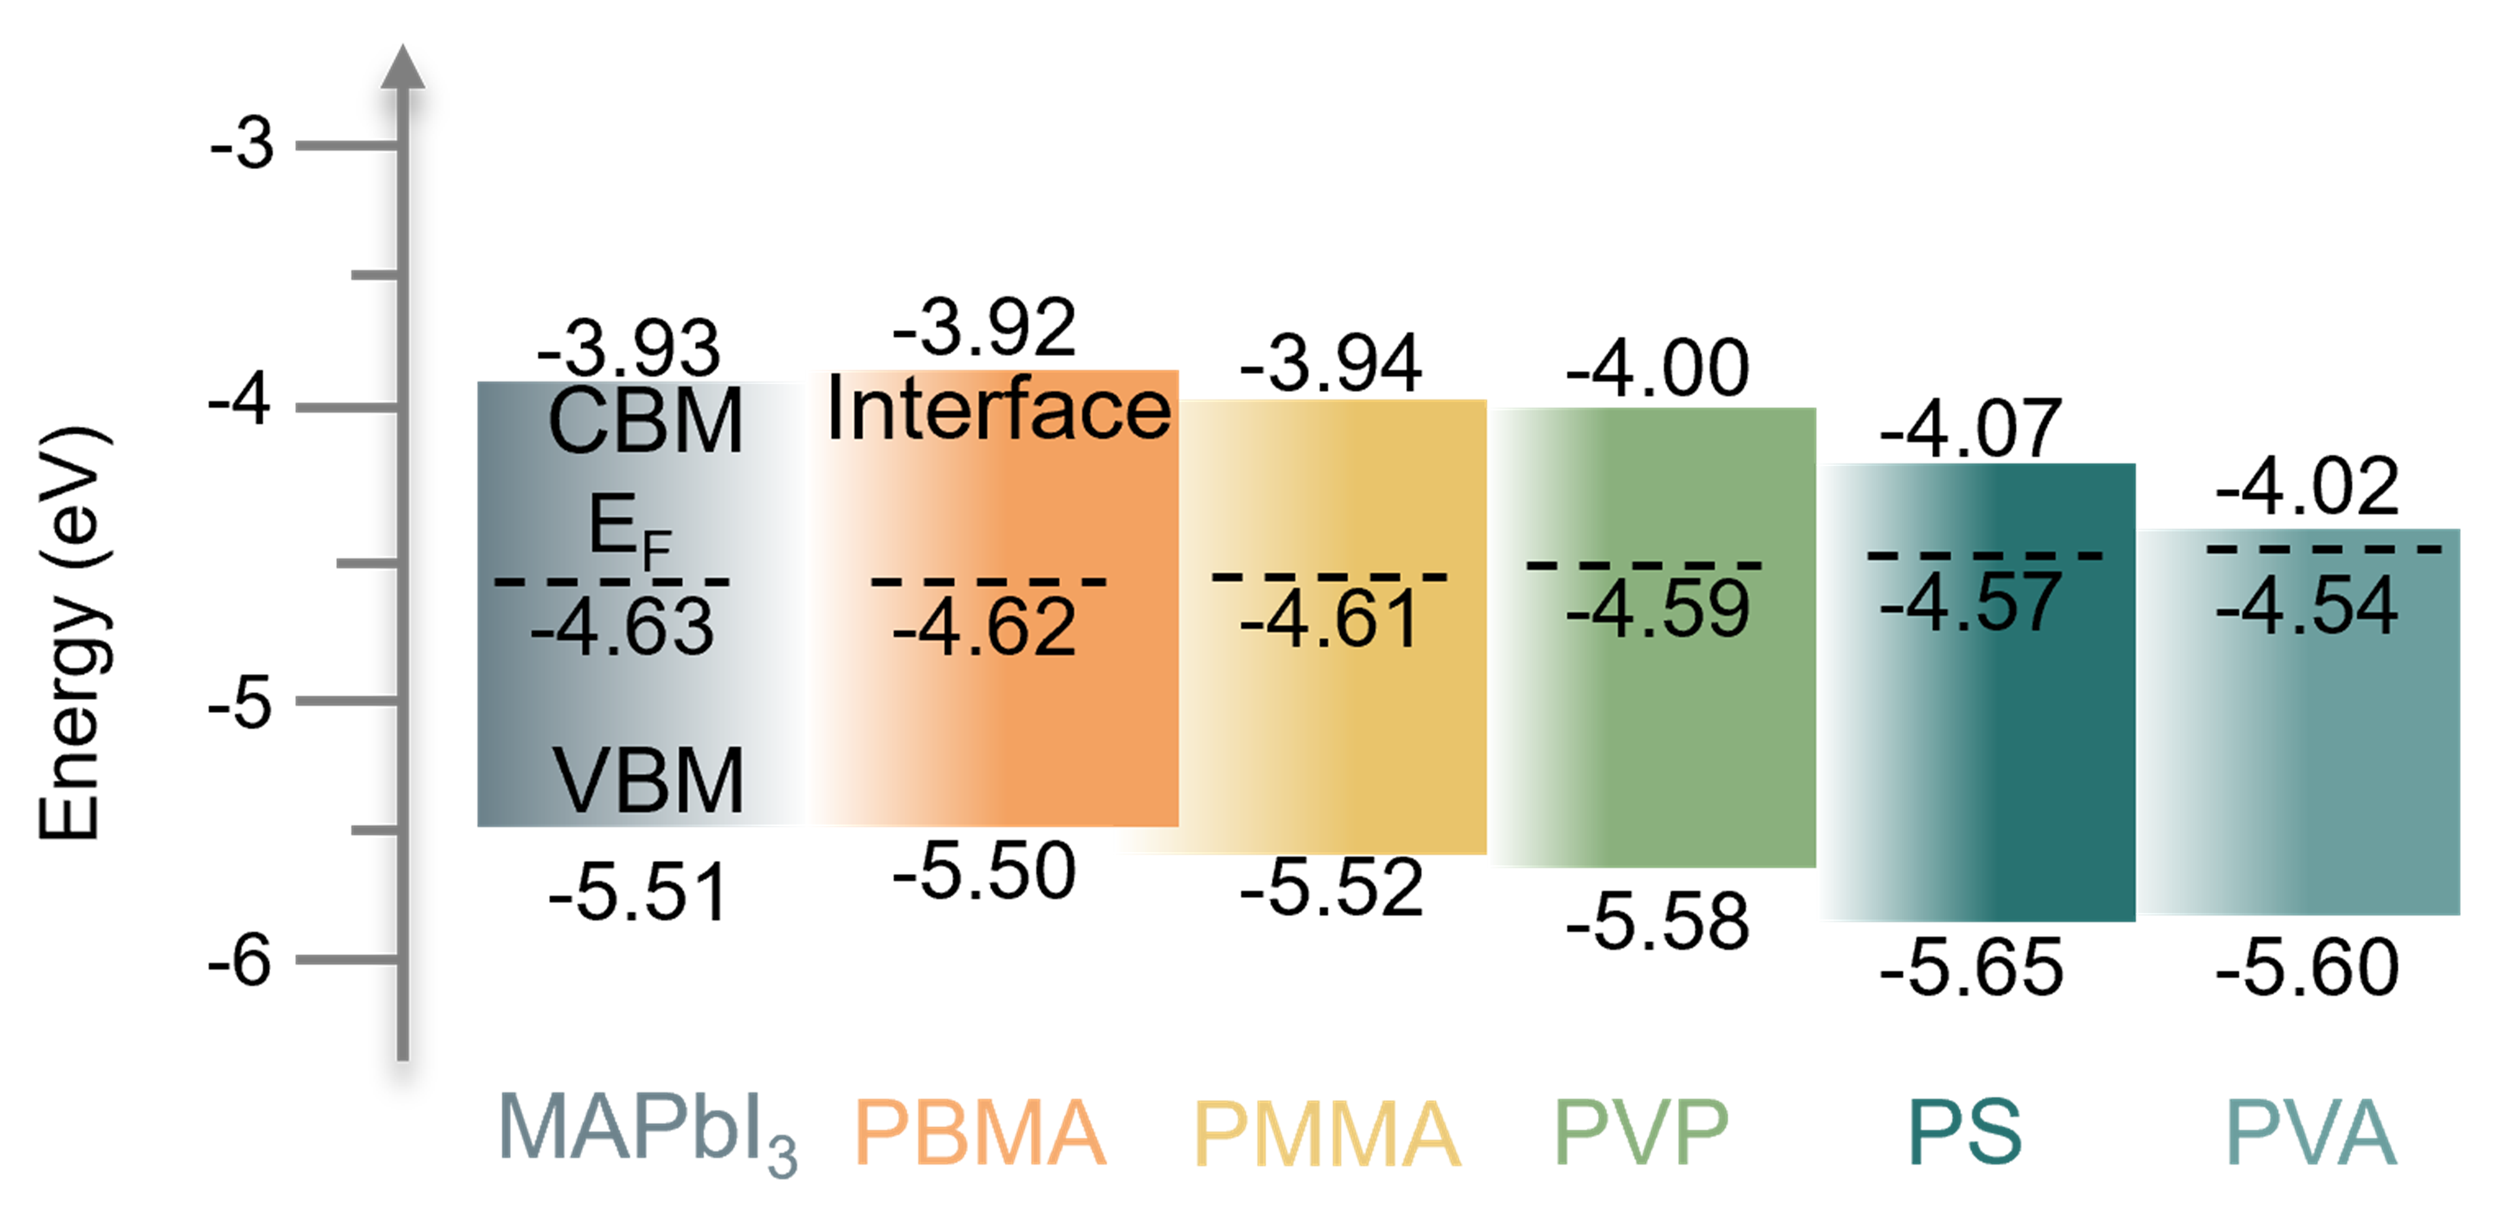


**Supplementary Figure 19.** **Energy-band diagrams of MAPbI3/polymer top interfaces.** The diagrams were constructed by combining the UPS-derived energy offsets in Supplementary Figure 17 with the optical bandgaps estimated from Supplementary Figure 18. Compared with the other polymer-modified interfaces, the MAPbI3/PBMA interface shows the smallest deviation from the pristine MAPbI3 energy levels, indicating the weakest interfacial self-n-doping and the most moderated band bending. This energetically balanced interface is favourable for maintaining electron transport across the MAPbI3/PBMA top interface while avoiding excessive ion-assisted electrostatic compensation.


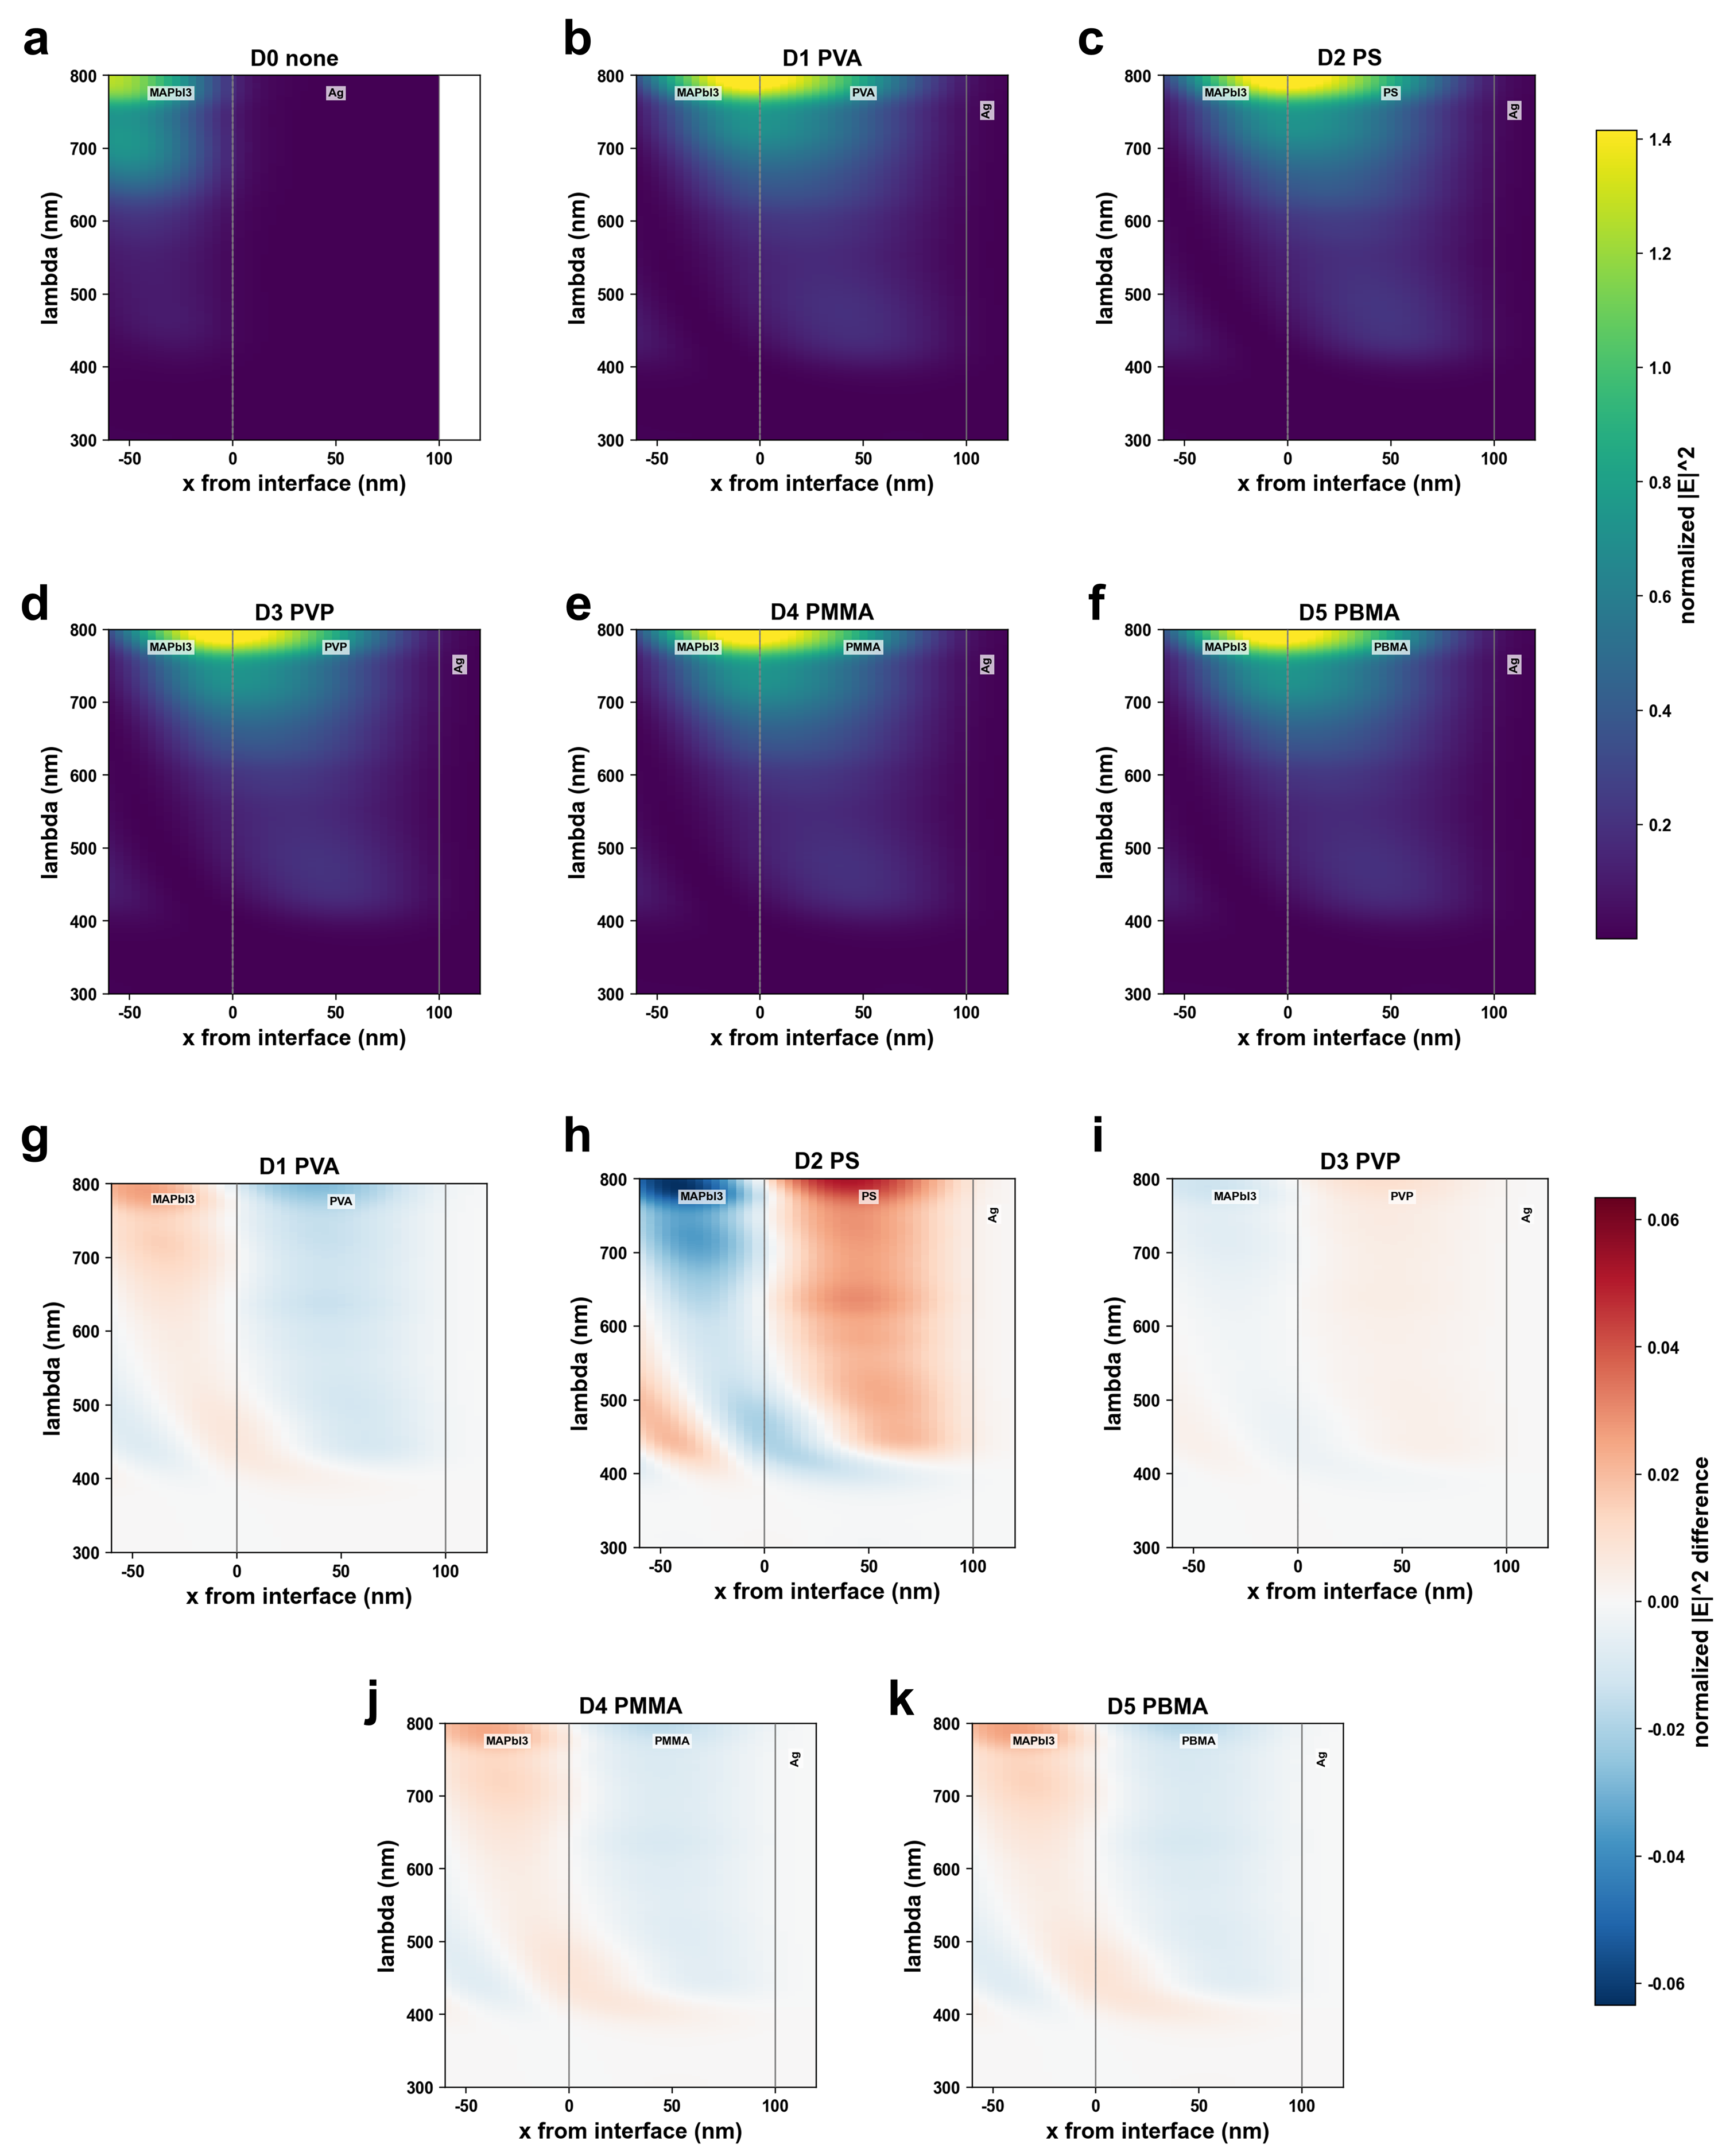


**Supplementary Figure 20. FDTD analysis of polymer-dependent interfacial electric-field redistribution.** a-f) Interface-local normalized electric-field intensity (|E|²) maps around the MAPbI3/polymer/Ag region. g-k) Mean-subtracted |E|² maps obtained by subtracting the averaged response of D1-D5. PS exhibits the strongest field displacement toward the polymer/Ag side, whereas PMMA and PBMA retain a more balanced ester-carbonyl-type field component on the MAPbI3 side. The persistent PBMA response is therefore attributed to the coupling among favourable interfacial field distribution, ester-carbonyl/Pb-stabilized ion redistribution and butyl-side-chain-regulated electron relaxation, rather than simple optical-field enhancement.


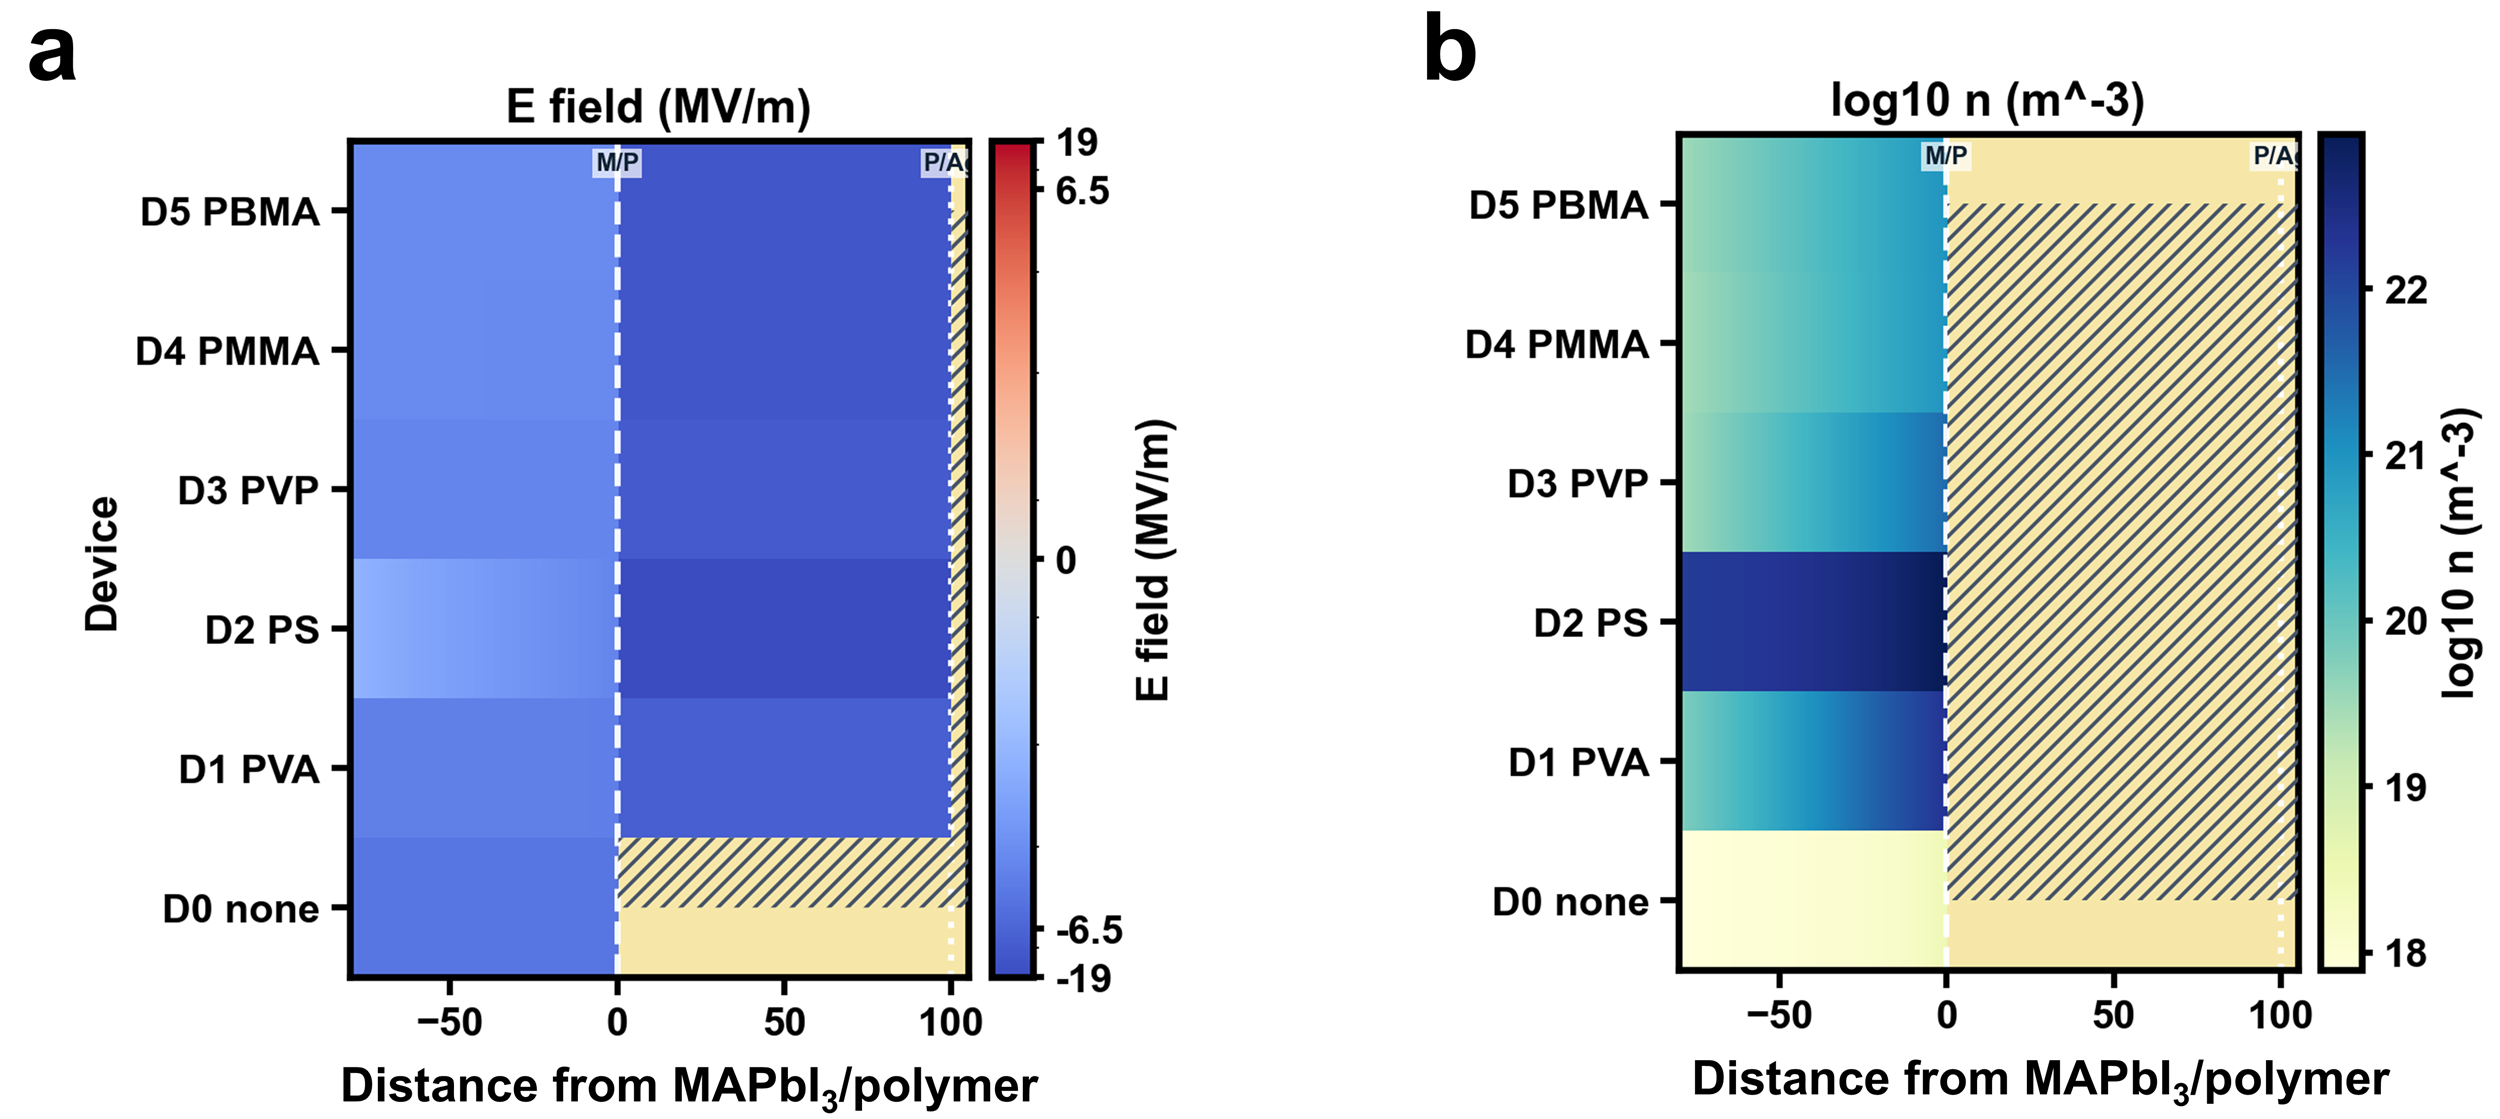


**Supplementary Fig. 21. COMSOL simulation of interfacial electrostatic-field and electron-density distributions.** a) Simulated electrostatic-field distribution across the MAPbI3/polymer top-interface region for D0-D5 devices. D0 represents the polymer-free MAPbI3/Ag reference, whereas D1-D5 correspond to PVA, PS, PVP, PMMA and PBMA interlayers, respectively. The dashed line marks the MAPbI3/polymer interface, and the hatched region denotes the polymer/electrode-side domain. Polymer insertion redistributes the MAPbI3-side field rather than simply screening the interface. b) Corresponding simulated electron-density distribution, plotted as . PS produces pronounced electron accumulation near the MAPbI₃ side, indicating strong local charge accumulation, whereas PMMA and PBMA maintain a more moderate electron-rich interfacial state.


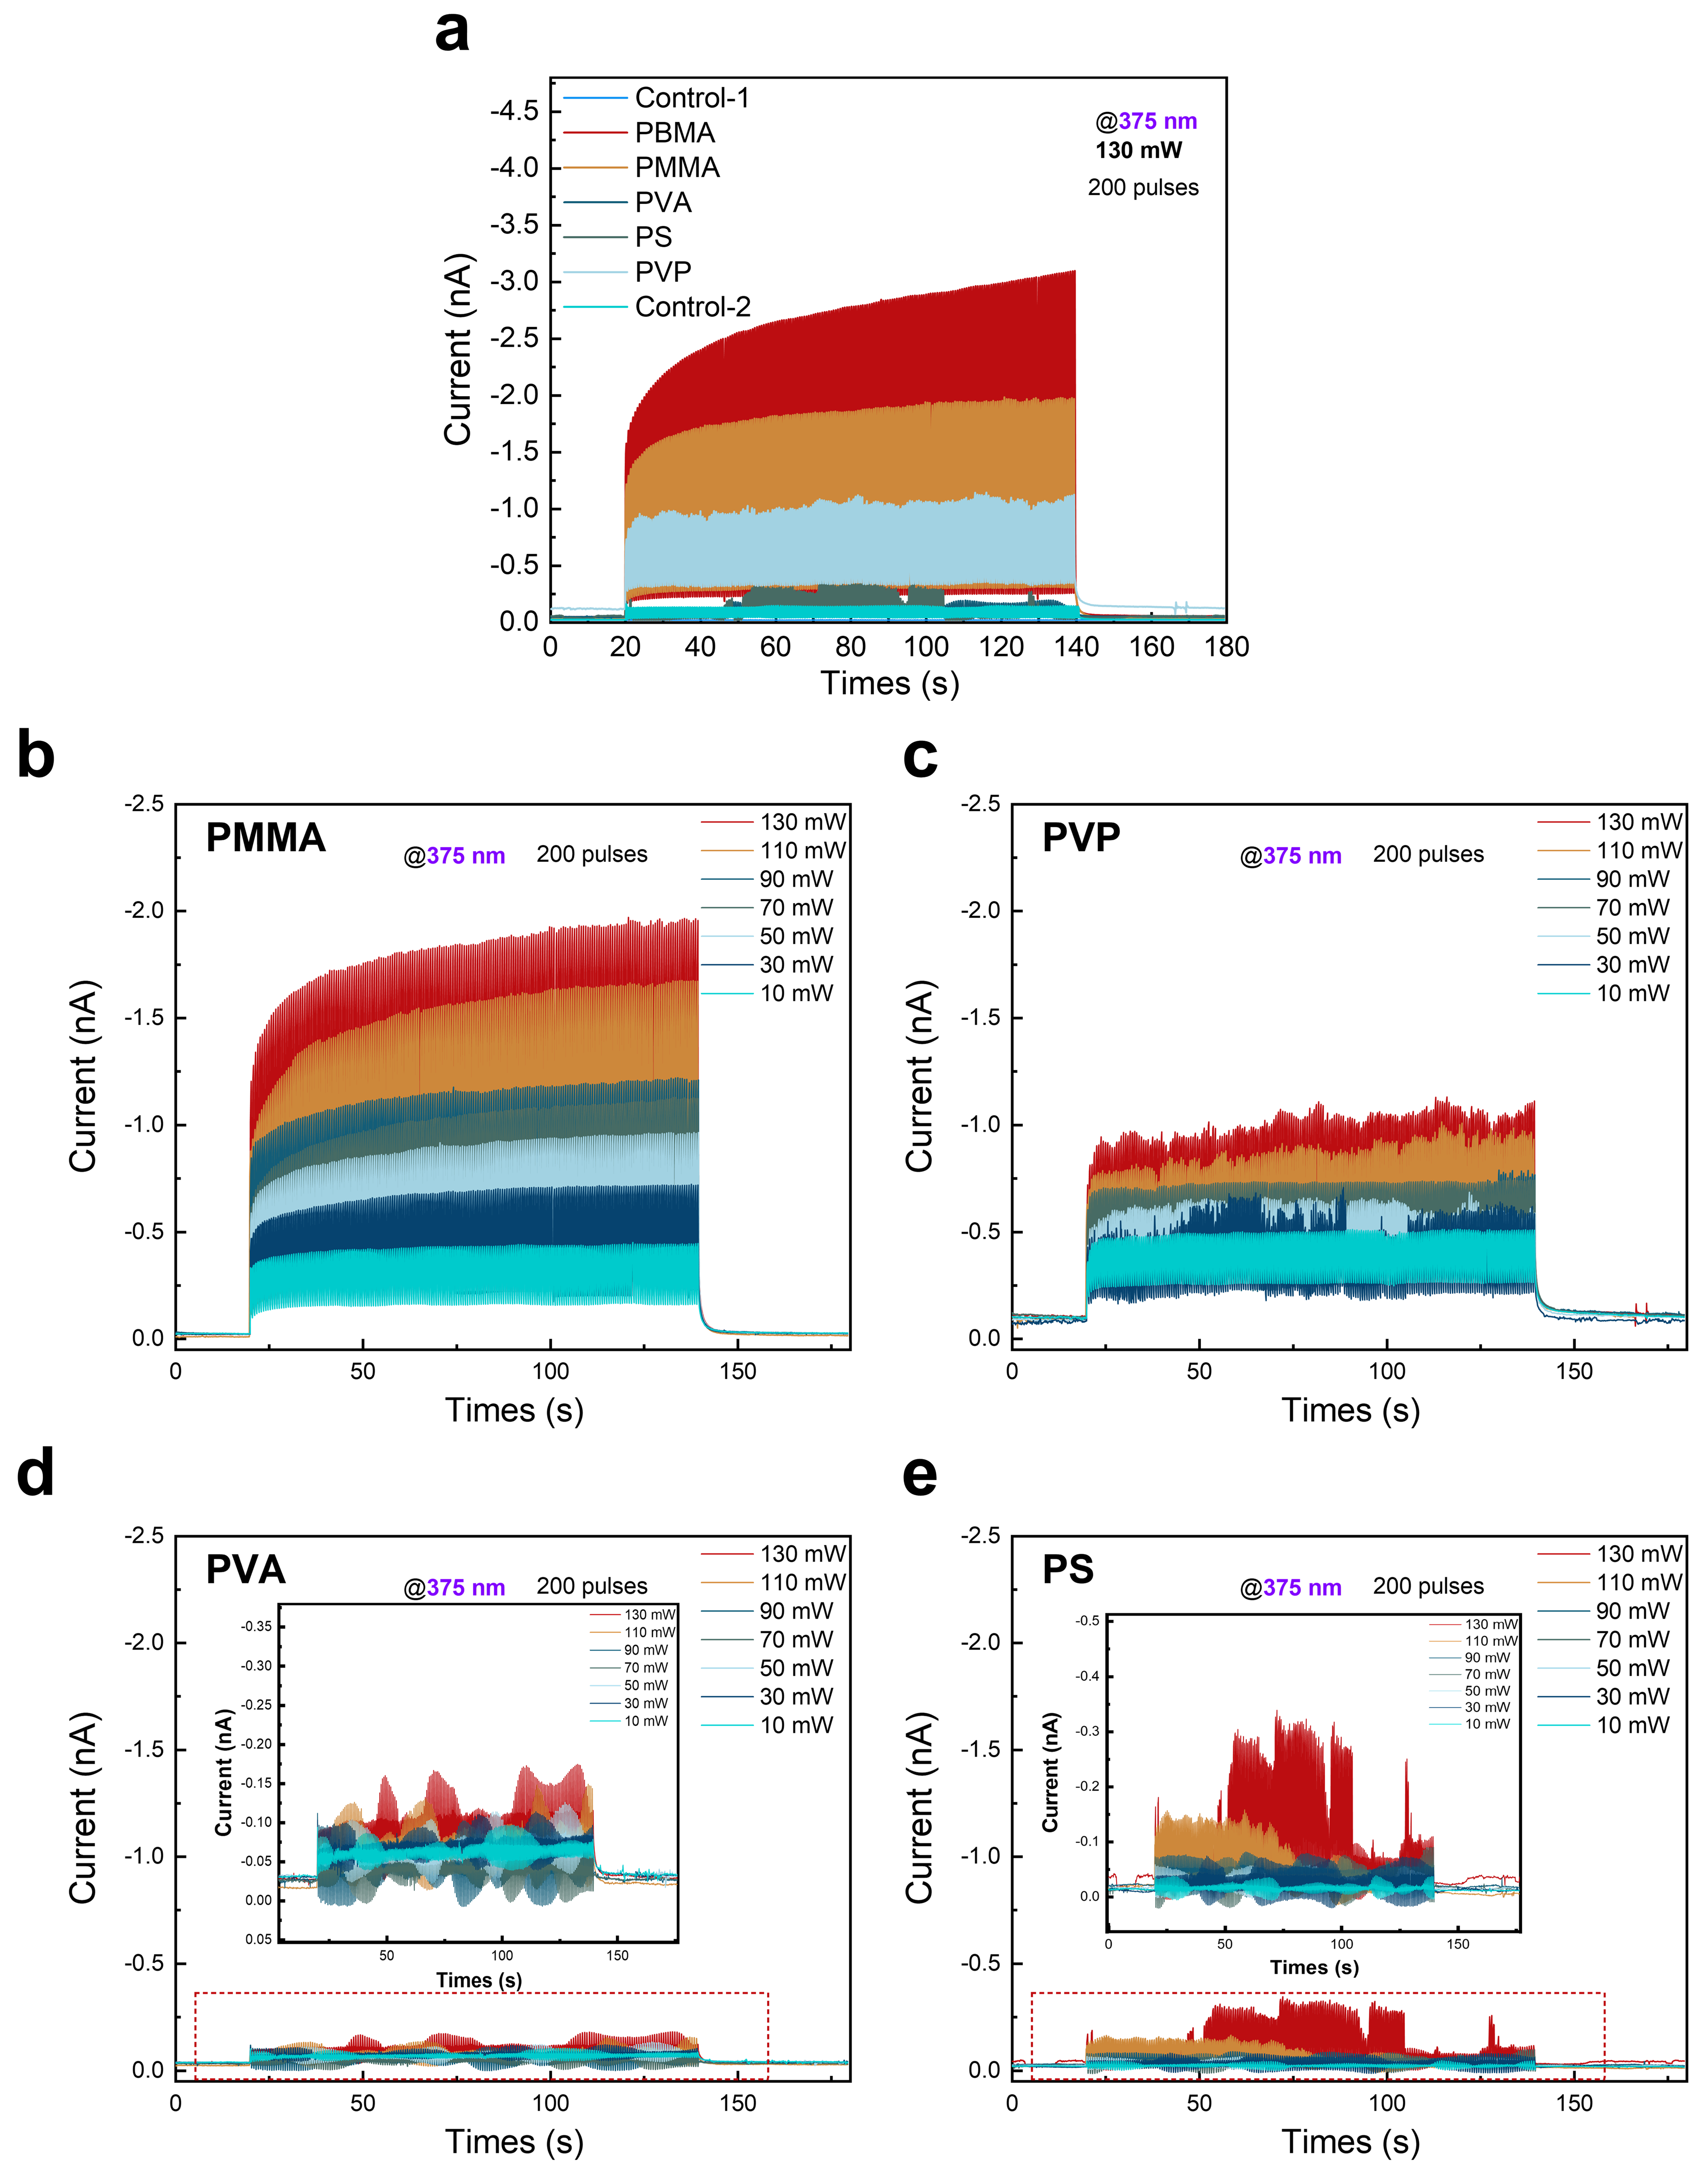


**Supplementary Figure 22. Pulse-train photoresponses of complete devices with different interface configurations.** a) Comparative pulse-train photoresponses of control and polymer-modified devices under 200 consecutive 375 nm optical excitation pulses. Control-1 and control-2 refer to ITO/P3HT/MAPbI3/Ag and ITO/MAPbI3/Ag devices, respectively. Control-2 shows negligible cumulative conductance modulation, indicating that the buried P3HT/MAPbI3 interface is required to establish the self-powered carrier-separation pathway. Control-1 exhibits only weak pulse-dependent memory, showing that buried-interface carrier separation alone is insufficient to sustain persistent optical memory without a programmed top recovery interphase. PBMA-, PMMA-, PVP-, PVA- and PS-based devices refer to ITO/P3HT/MAPbI3/polymer/Ag structures in which the MAPbI3 top surface is modified by the corresponding polymer layer. b-e) Power-dependent pulse-train photoresponses of PMMA-, PVP-, PVA- and PS-modified devices under 375 nm optical excitation with a pulse duration of 300 ms. Compared with hydroxyl-, phenyl- and lactam-carbonyl-based interfaces, ester-carbonyl-containing PMMA and PBMA devices exhibit stronger cumulative photoresponses, with PBMA showing the most persistent photoinduced conductance modulation. These controls verify that the device performance originates from the vertically partitioned interfacial architecture rather than from a simple top-layer enhancement effect.


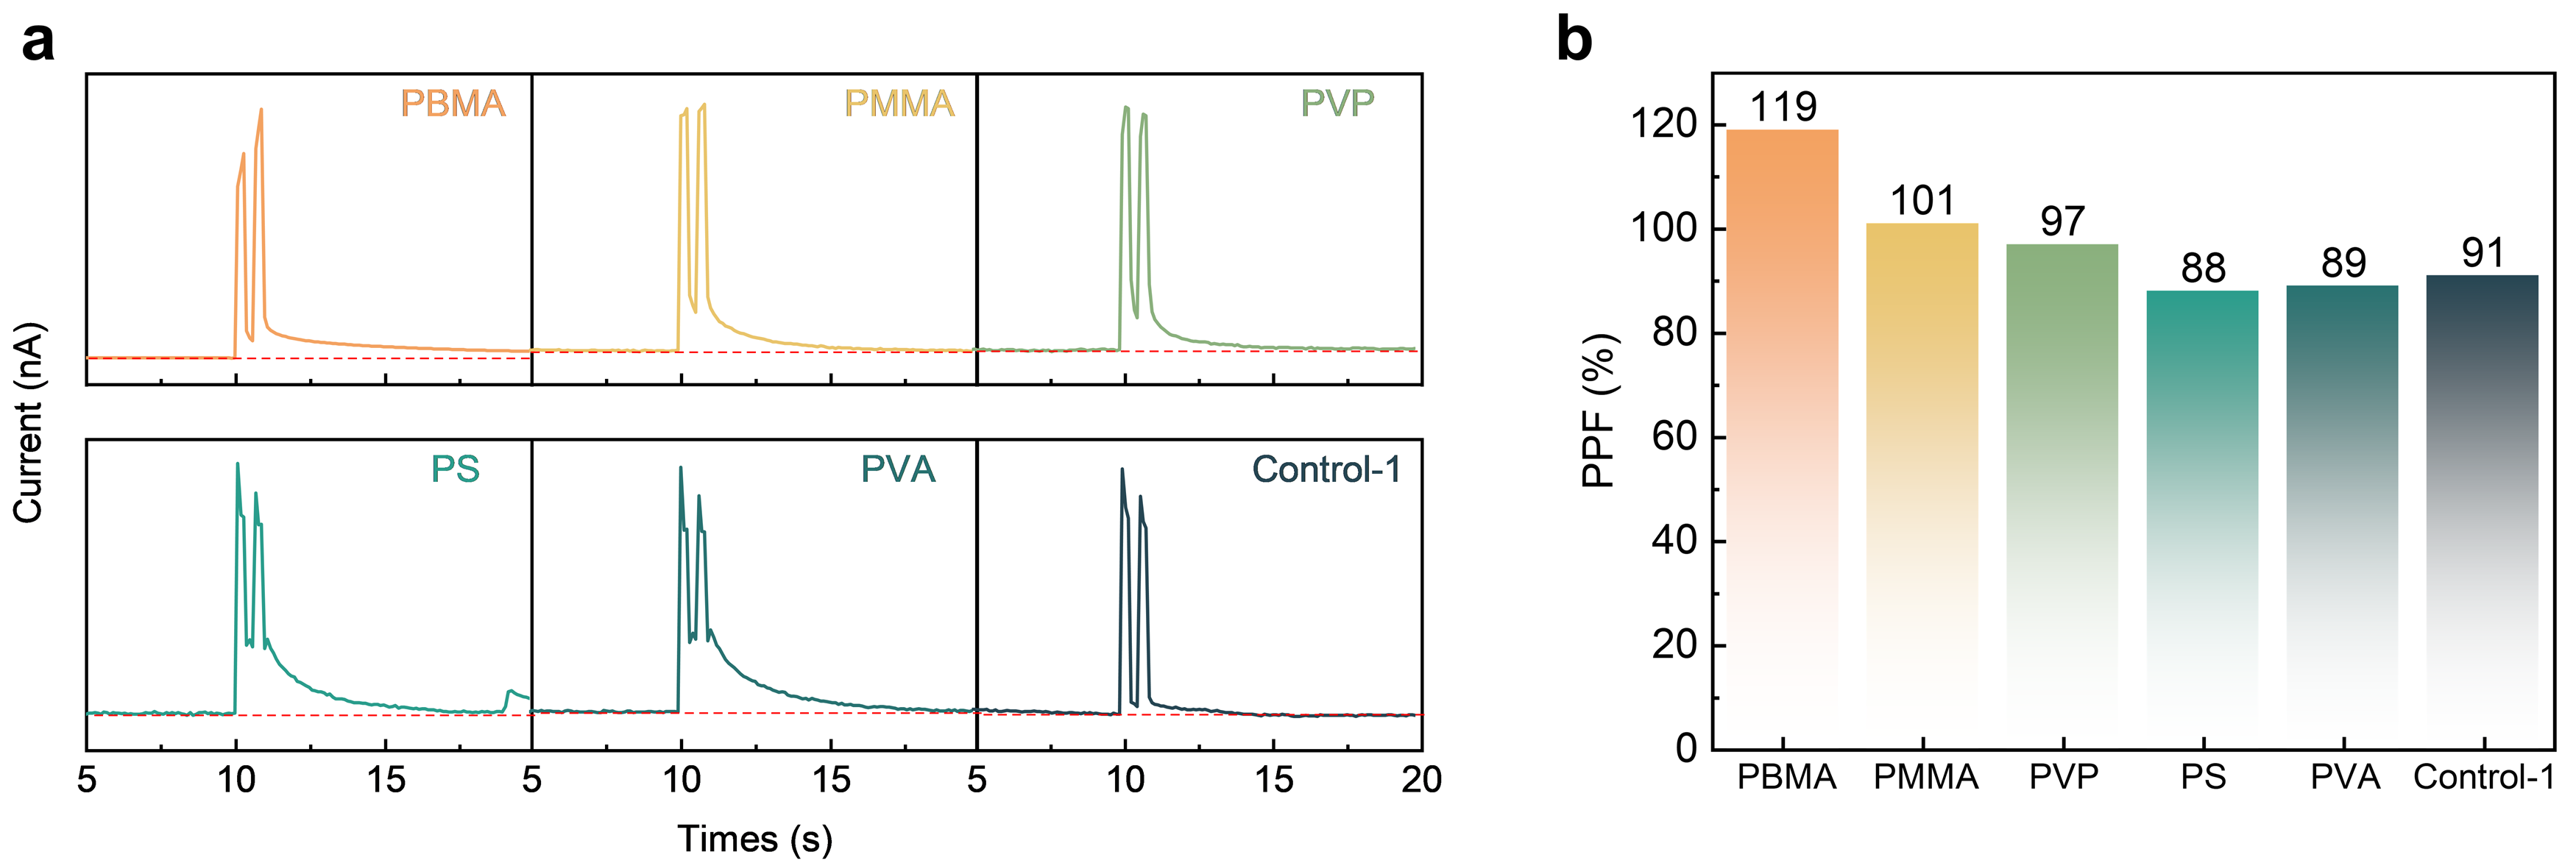


**Supplementary Figure 23.** **Quantitative comparison of paired-pulse facilitation in complete devices with different MAPbI3 top interfaces.** a) Representative paired-pulse photoresponses of ITO/P3HT/MAPbI3/polymer/Ag devices with PBMA, PMMA, PVP, PS and PVA top modification layers, together with the control device without a polymer top interface. Measurements were performed under 520 nm optical excitation at 130 mW with a pulse duration of 0.3 s and an interpulse interval of 0.3 s. b) Extracted paired-pulse facilitation (PPF) indices, defined as , where and are the peak currents induced by the first and second optical excitation pulses, respectively. PBMA exhibits the highest PPF index (119%), followed by PMMA (101%) and PVP (97%), whereas PS (88%), PVA (89%) and the control (91%) device show lower facilitation. The representative traces in **a** further indicate that PBMA retains the photoinduced conductance perturbation for a longer time before returning to the baseline, consistent with stronger residual interfacial memory and slower relaxation of the photoinduced electronic state.


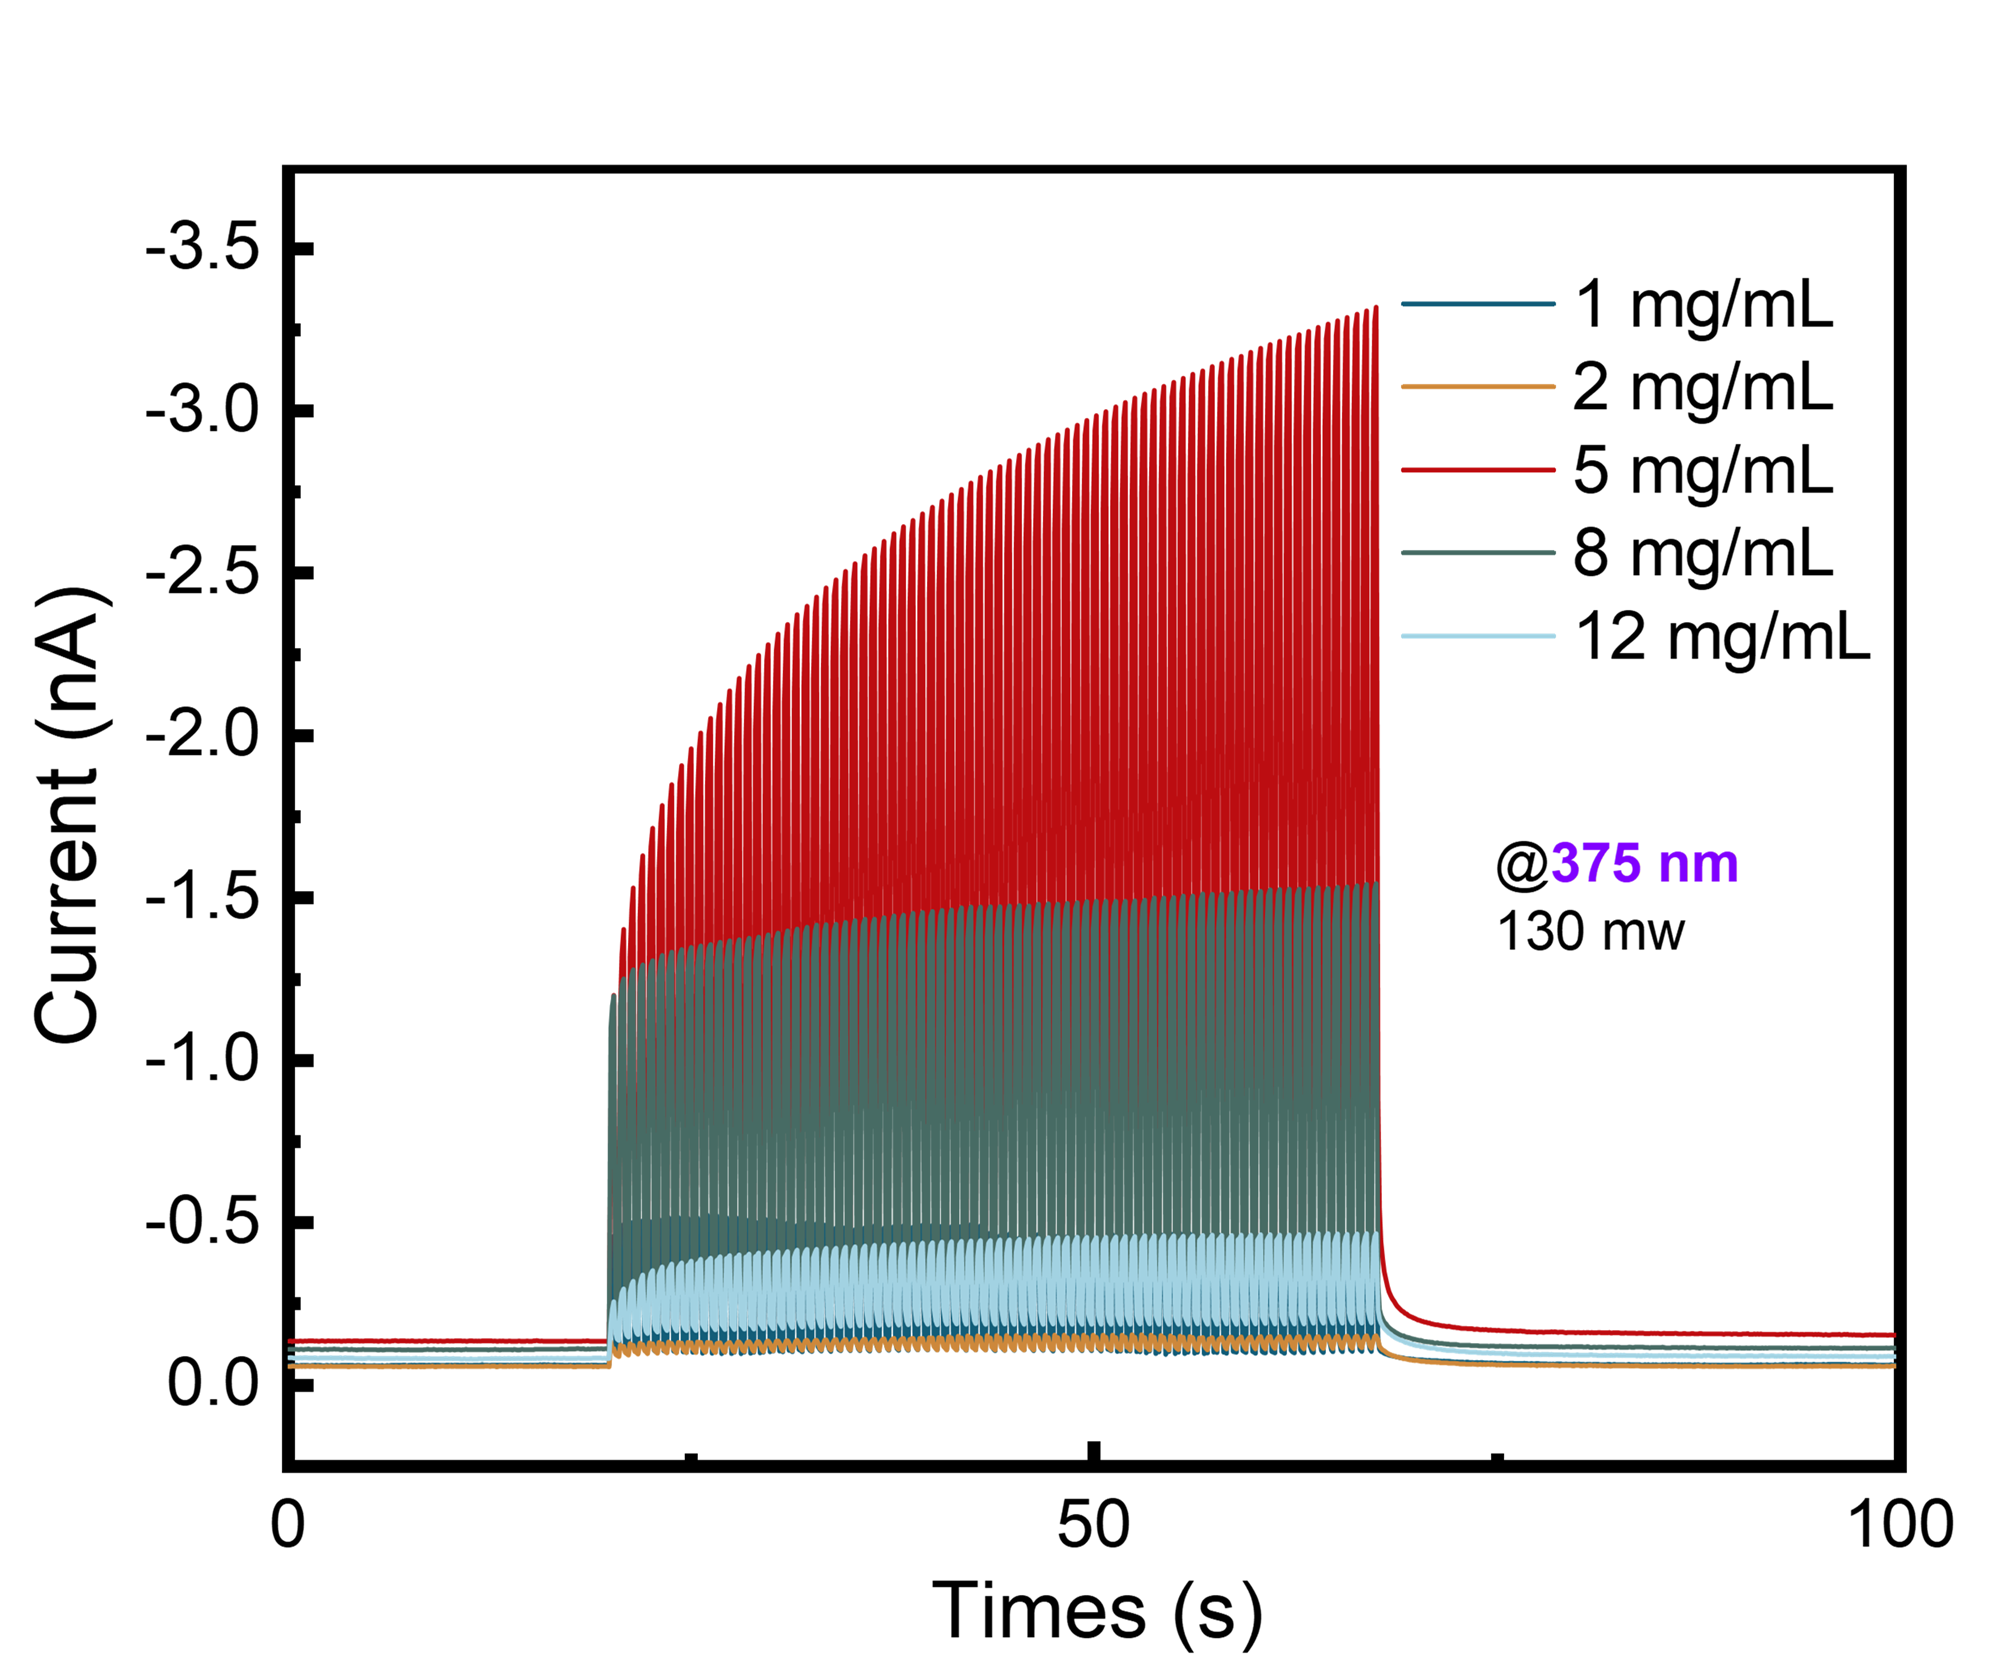


**Supplementary Figure 24.** **Concentration-dependent pulse-train photoresponses of PBMA-modified devices.** The figure presents pulse-train photoresponses of ITO/P3HT/MAPbI3/PBMA/Ag devices prepared with different PBMA concentrations. The concentration-dependent response identifies the processing window in which sufficient ester-carbonyl/Pb interaction and side-chain-regulated electronic relaxation are achieved without blocking interfacial electronic transport.

**
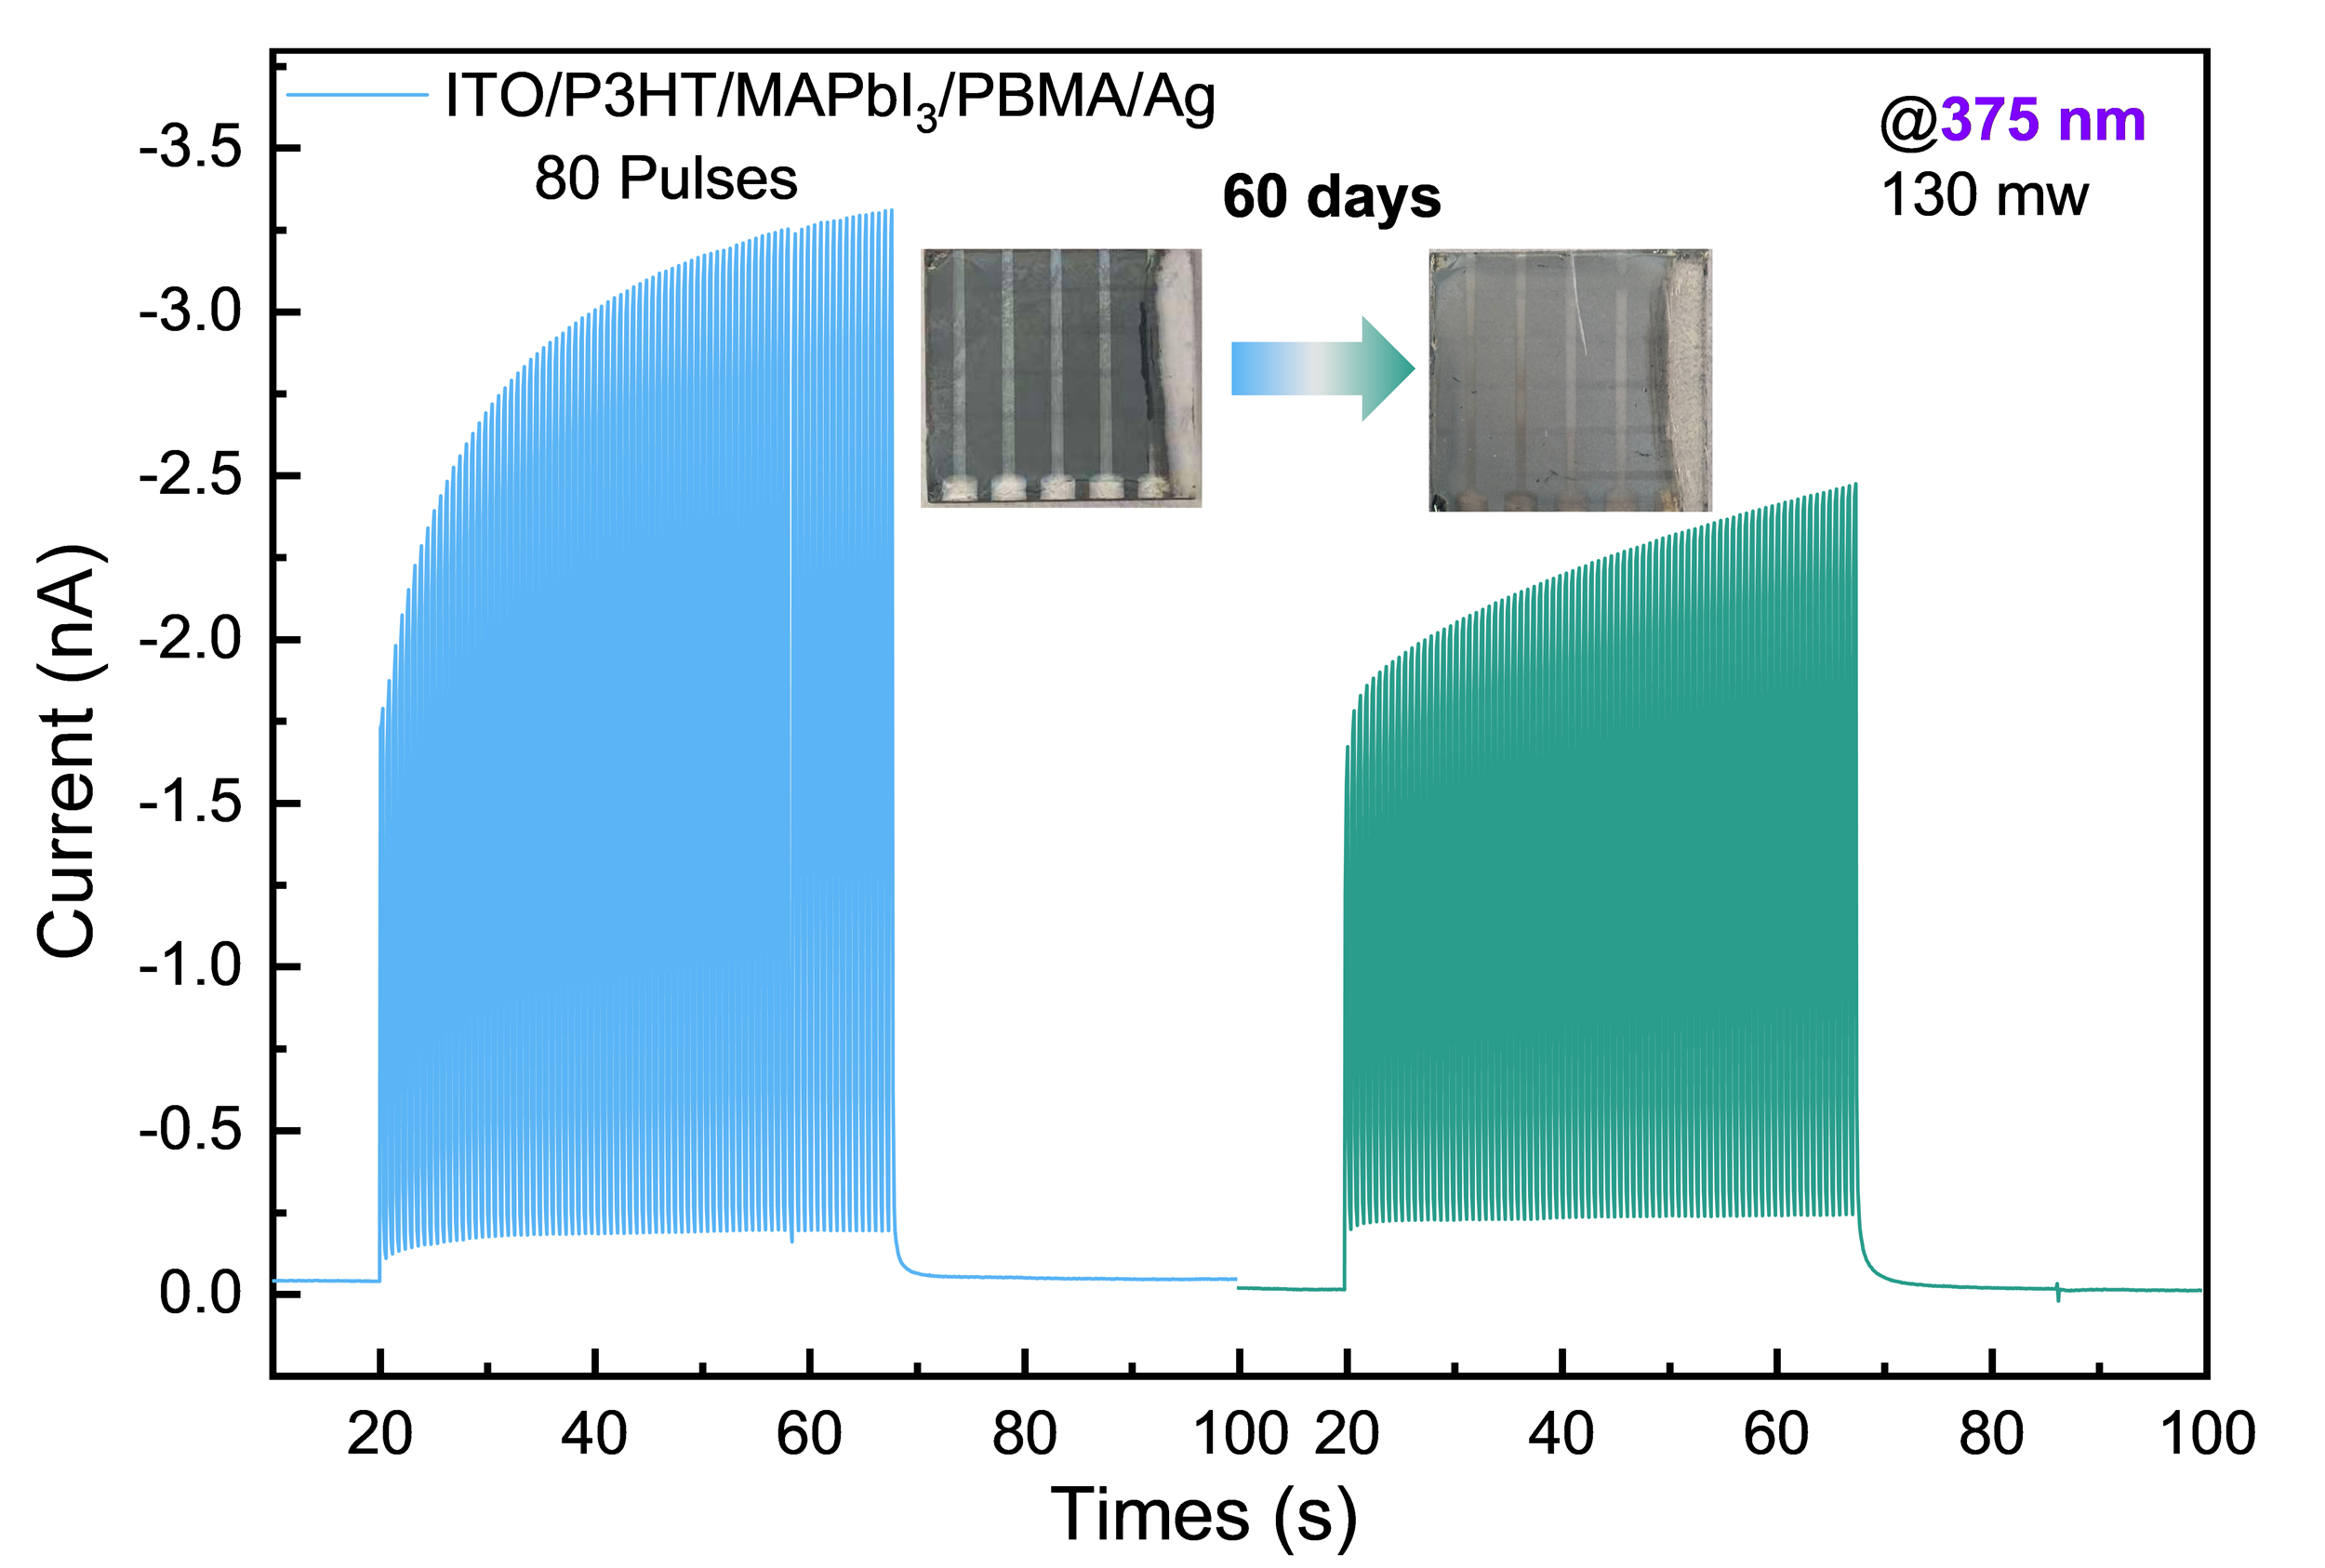
**

**Supplementary Figure 25. Storage stability of pulse-train photoresponses.** The Supplementary Figure shows pulse-train photoresponses of PBMA-modified devices measured after storage in a N2 environment. The retained cumulative response confirms the stability of the PBMA-regulated ion-electron relaxation pathway and excludes rapidly degraded interfacial switching as the origin of optical memory.


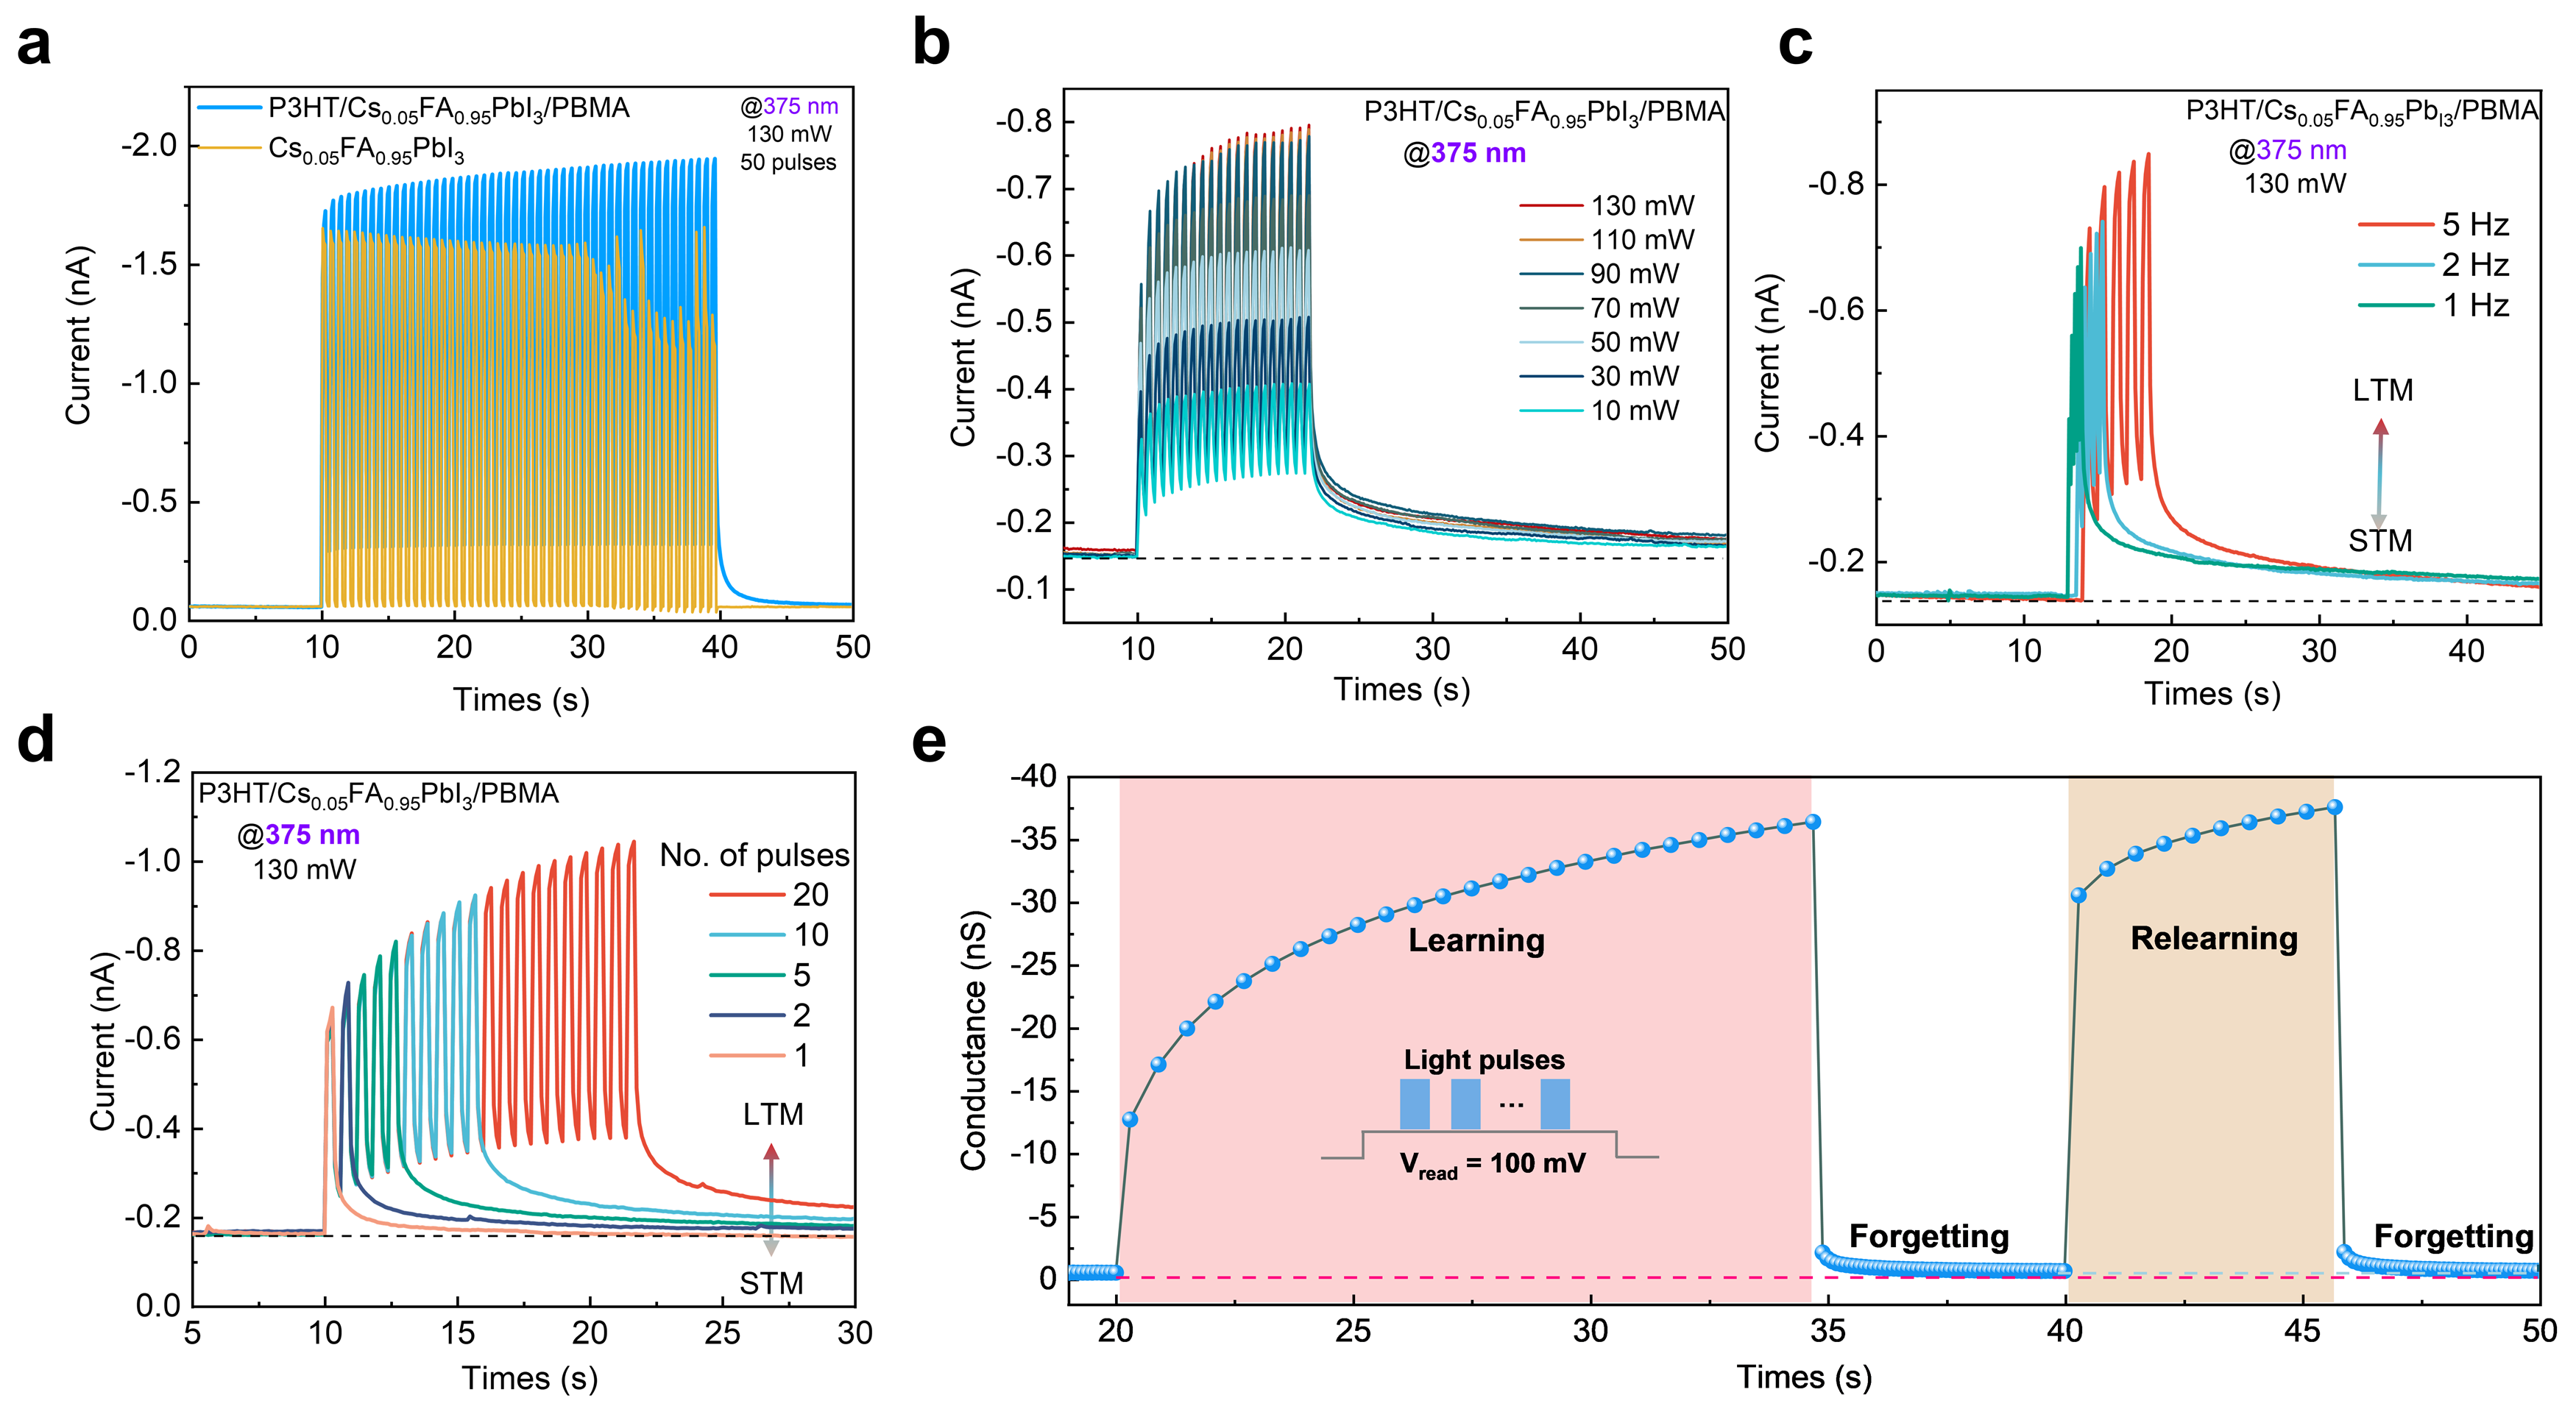


**Supplementary Figure 26. Self-powered photomemristors of Cs0.05FA0.95PbI3-based devices.** a) Comparative pulse-train photoresponses of ITO/Cs0.05FA0.95PbI3/Ag and ITO/P3HT/Cs0.05FA0.95PbI3/PBMA/Ag devices under 50 consecutive 375 nm optical excitation pulses. The vertically partitioned interface device exhibits stronger pulse-dependent conductance modulation than the control structure, indicating that the P3HT buried interface and PBMA top interphase remain effective in a mixed-cation iodide perovskite. b) Power-dependent pulse-train photoresponses of the Cs0.05FA0.95PbI3-based vertically partitioned interface device. The increased conductance modulation at higher optical power confirms optical-dose-dependent accumulation under self-powered operation. c) Frequency-dependent pulse-train photoresponses. The evolution of the response with pulse frequency reflects competition between photoinduced conductance accumulation and interfacial relaxation, consistent with history-dependent optical memory. d) Pulse-count-dependent photoresponses. The progressive response evolution with increasing pulse number demonstrates cumulative optical memory in the mixed-cation perovskite device. e) Conductance modulation during learning, forgetting and relearning under sequential 375 nm optical pulse trains. The residual conductance after forgetting and the accelerated response during relearning indicate that the device retains optical history through delayed interfacial recovery. Thus, these results show that the vertically partitioned interfacial architecture is not limited to single-cation MAPbI3, but can be extended to Cs0.05FA0.95PbI3, supporting the generality of buried-interface carrier separation coupled with PBMA-regulated ion-electron relaxation.


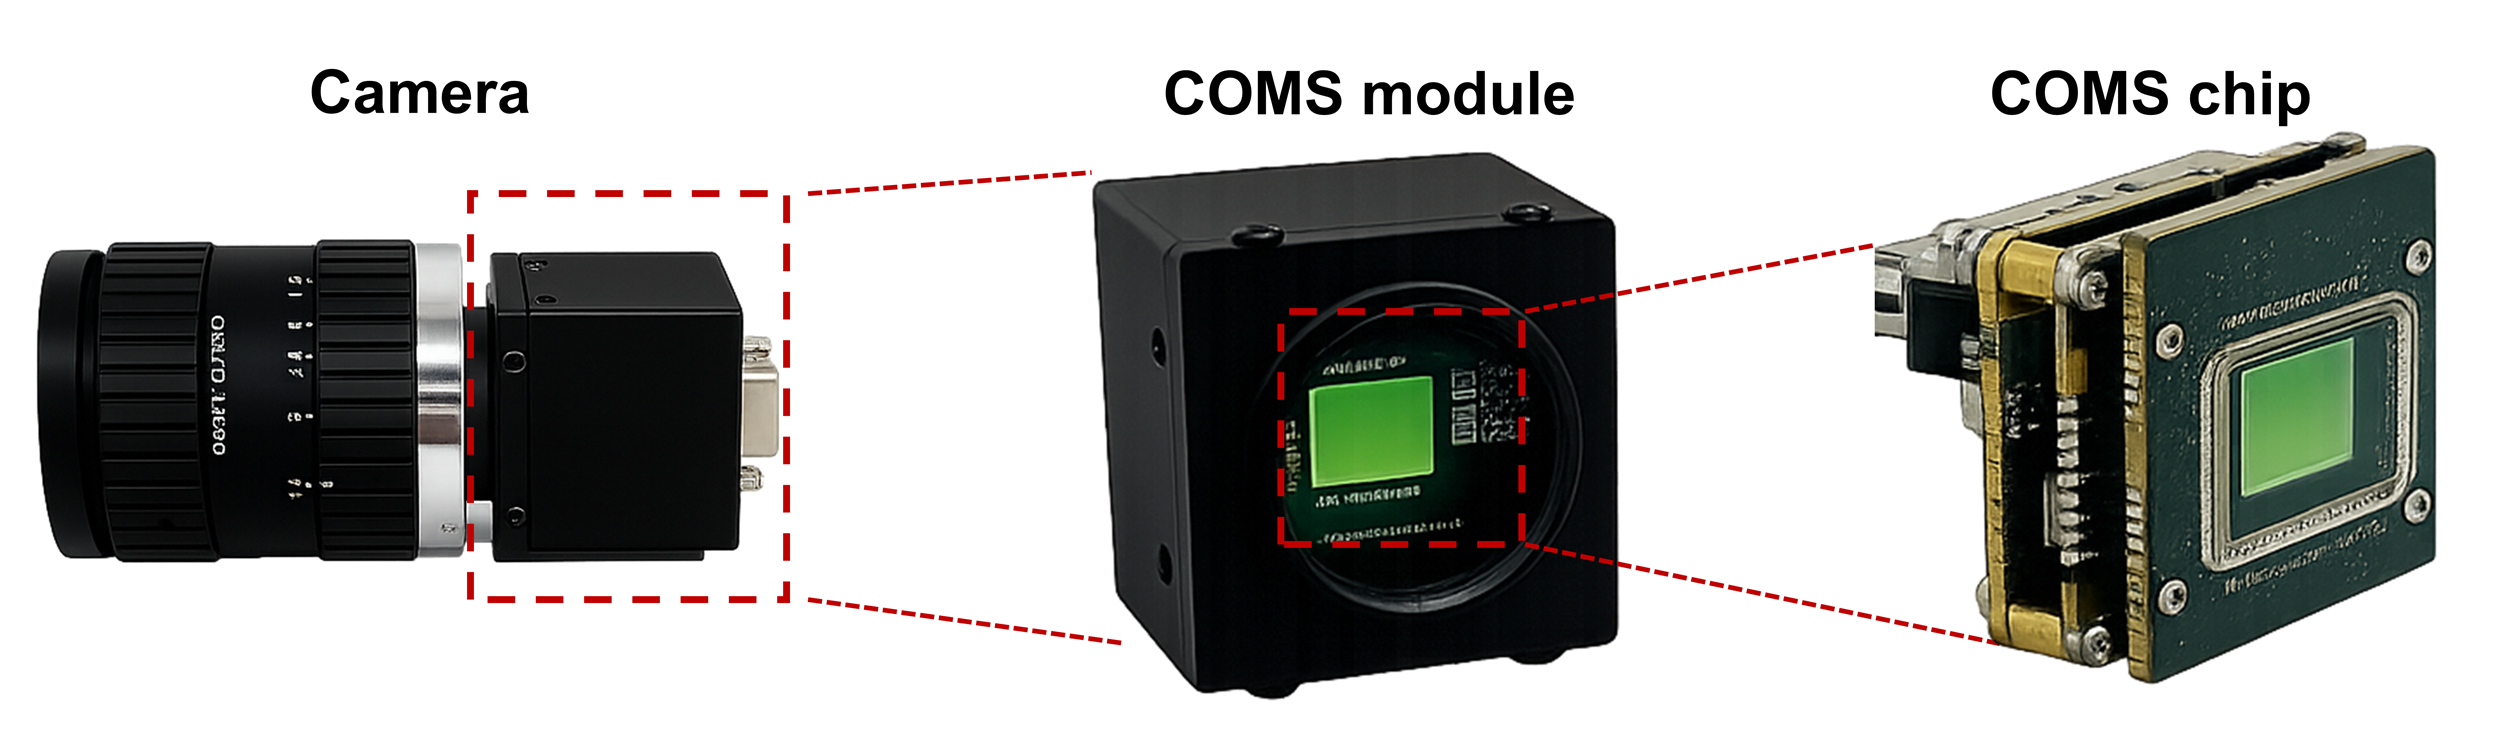


**Supplementary Figure 27. Experimental implementation of the CMOS-integrated imaging platform.** The Supplementary Figure shows photographs of the visual camera, CMOS module and integrated perovskite/ROIC chip used for imaging experiments. The optimized P3HT/MAPbI3/PBMA photomemristive stack is directly coupled to the ROIC platform, enabling optical-pattern acquisition through the self-powered perovskite memory layer before circuit-level readout.


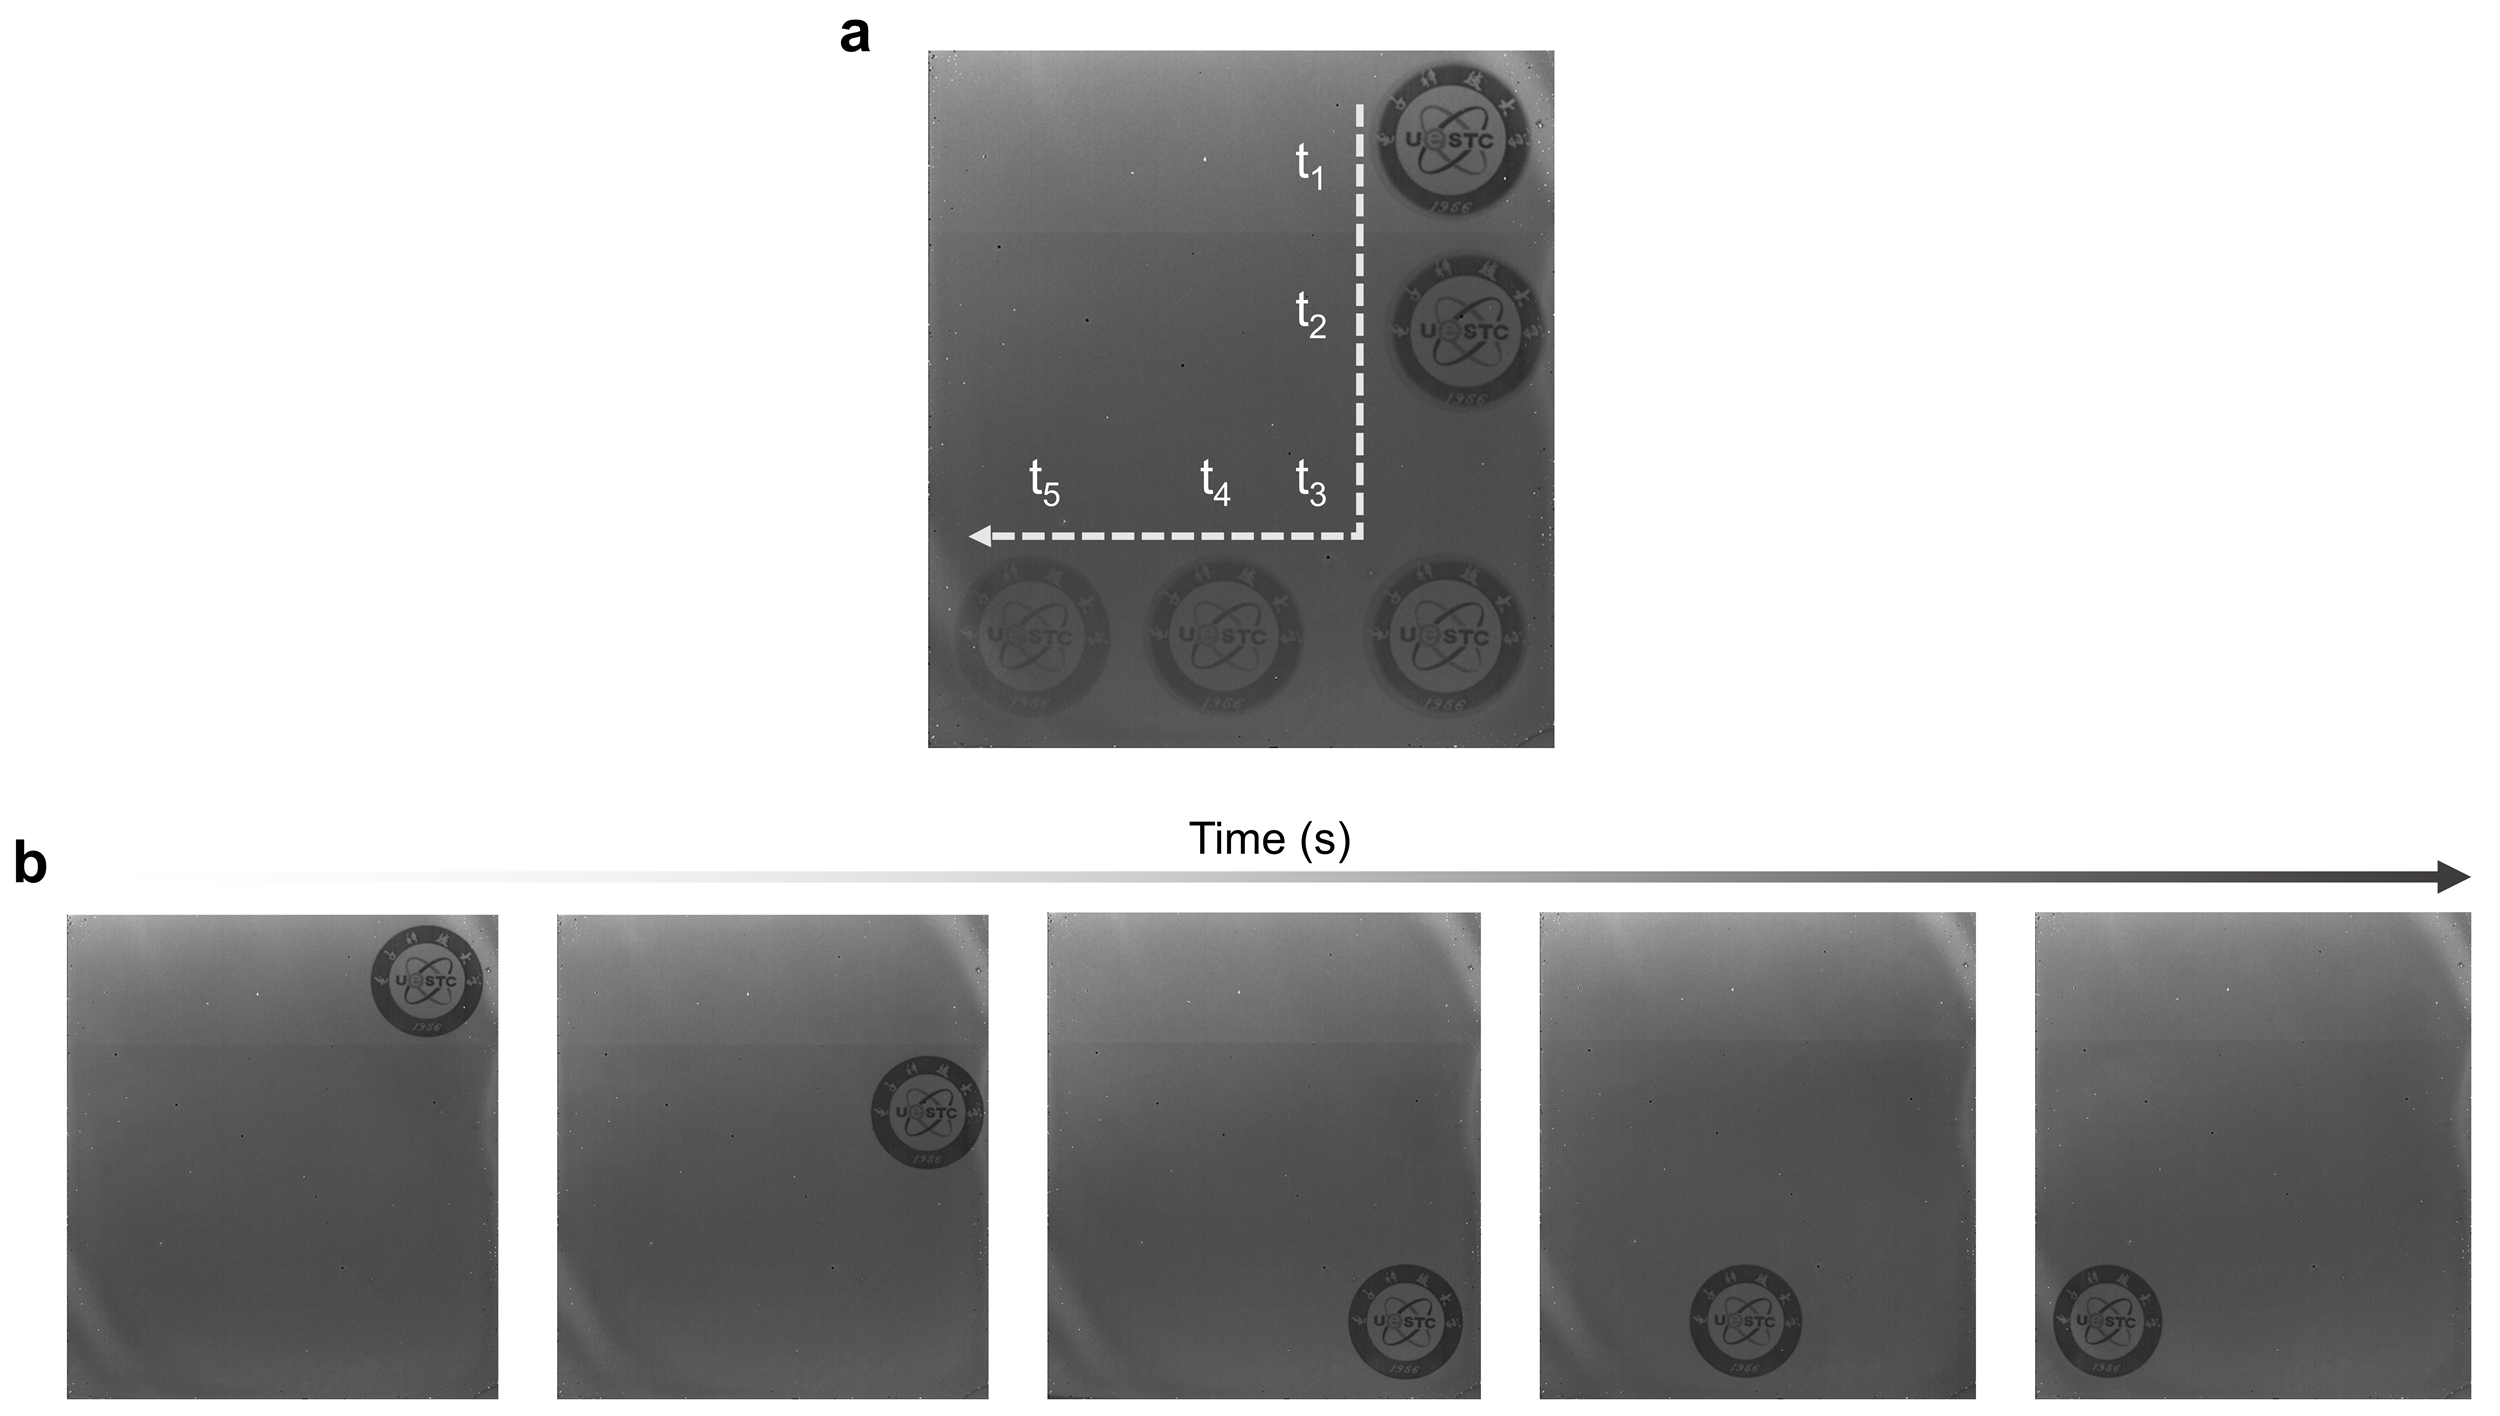


**Supplementary Figure 28. Spatial motion of the university emblem.** a) Motion trajectory of the emblem. b) Images extracted at five representative time points during the motion process (t1 = 0 s, t2 = 1 s, t3 = 2 s, t4 = 3 s, t5 = 4 s). Residual signals from previous positions coexist with newly illuminated regions, demonstrating that the CMOS-integrated perovskite photomemristor array converts patterned optical motion into hardware-encoded spatiotemporal memory.


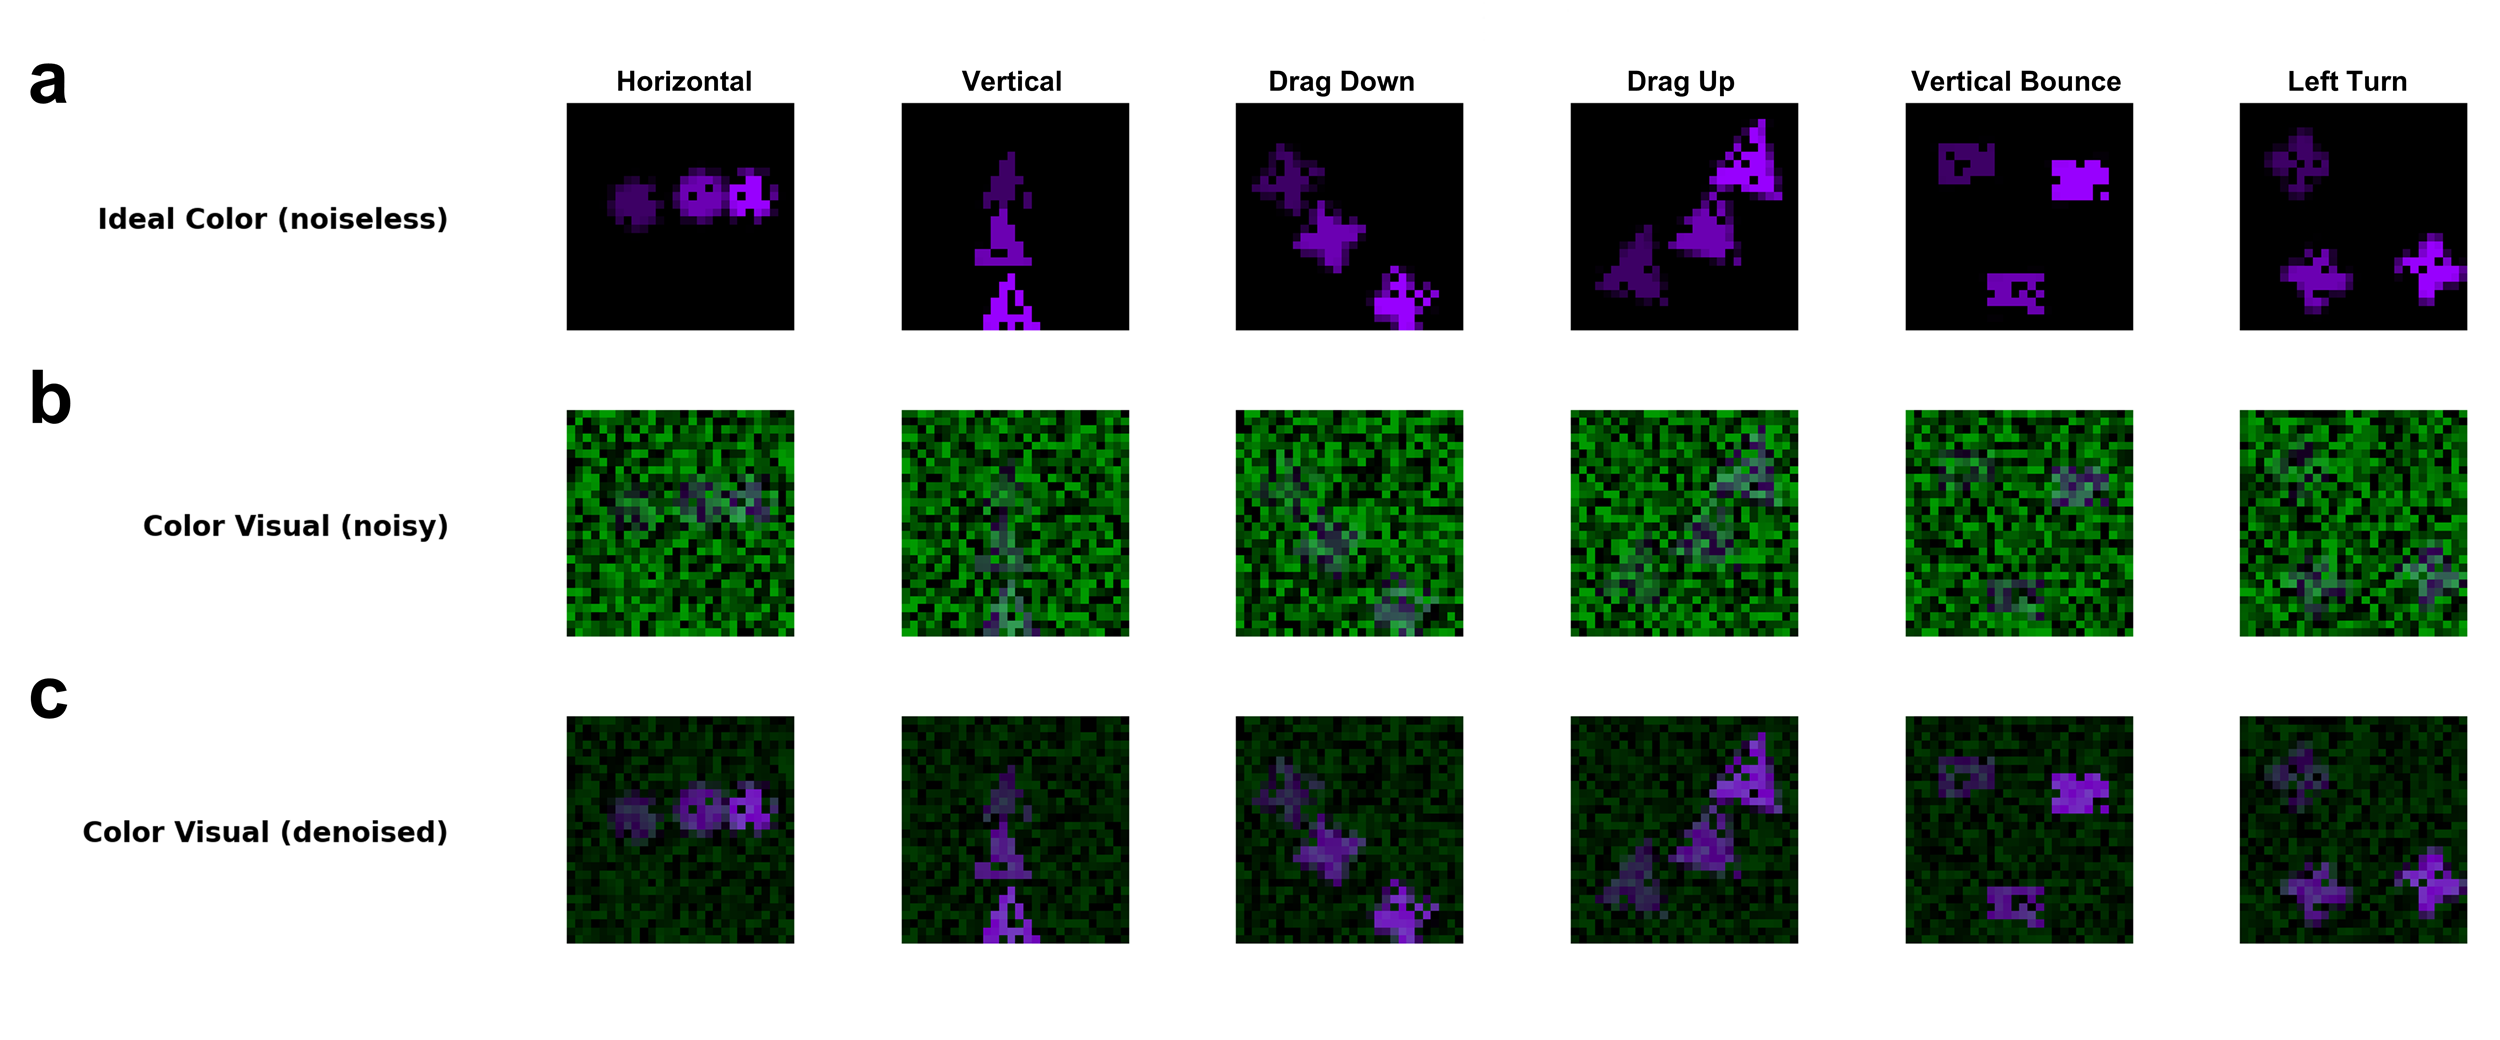


**Supplementary Figure 29. Hardware-level color-channel preprocessing of dynamic visual inputs.** The weaker 520 nm response is encoded as the background channel, whereas the stronger 375 nm response is encoded as the target-signal channel. The differential gain physically enhances the target-related component before digital analysis.


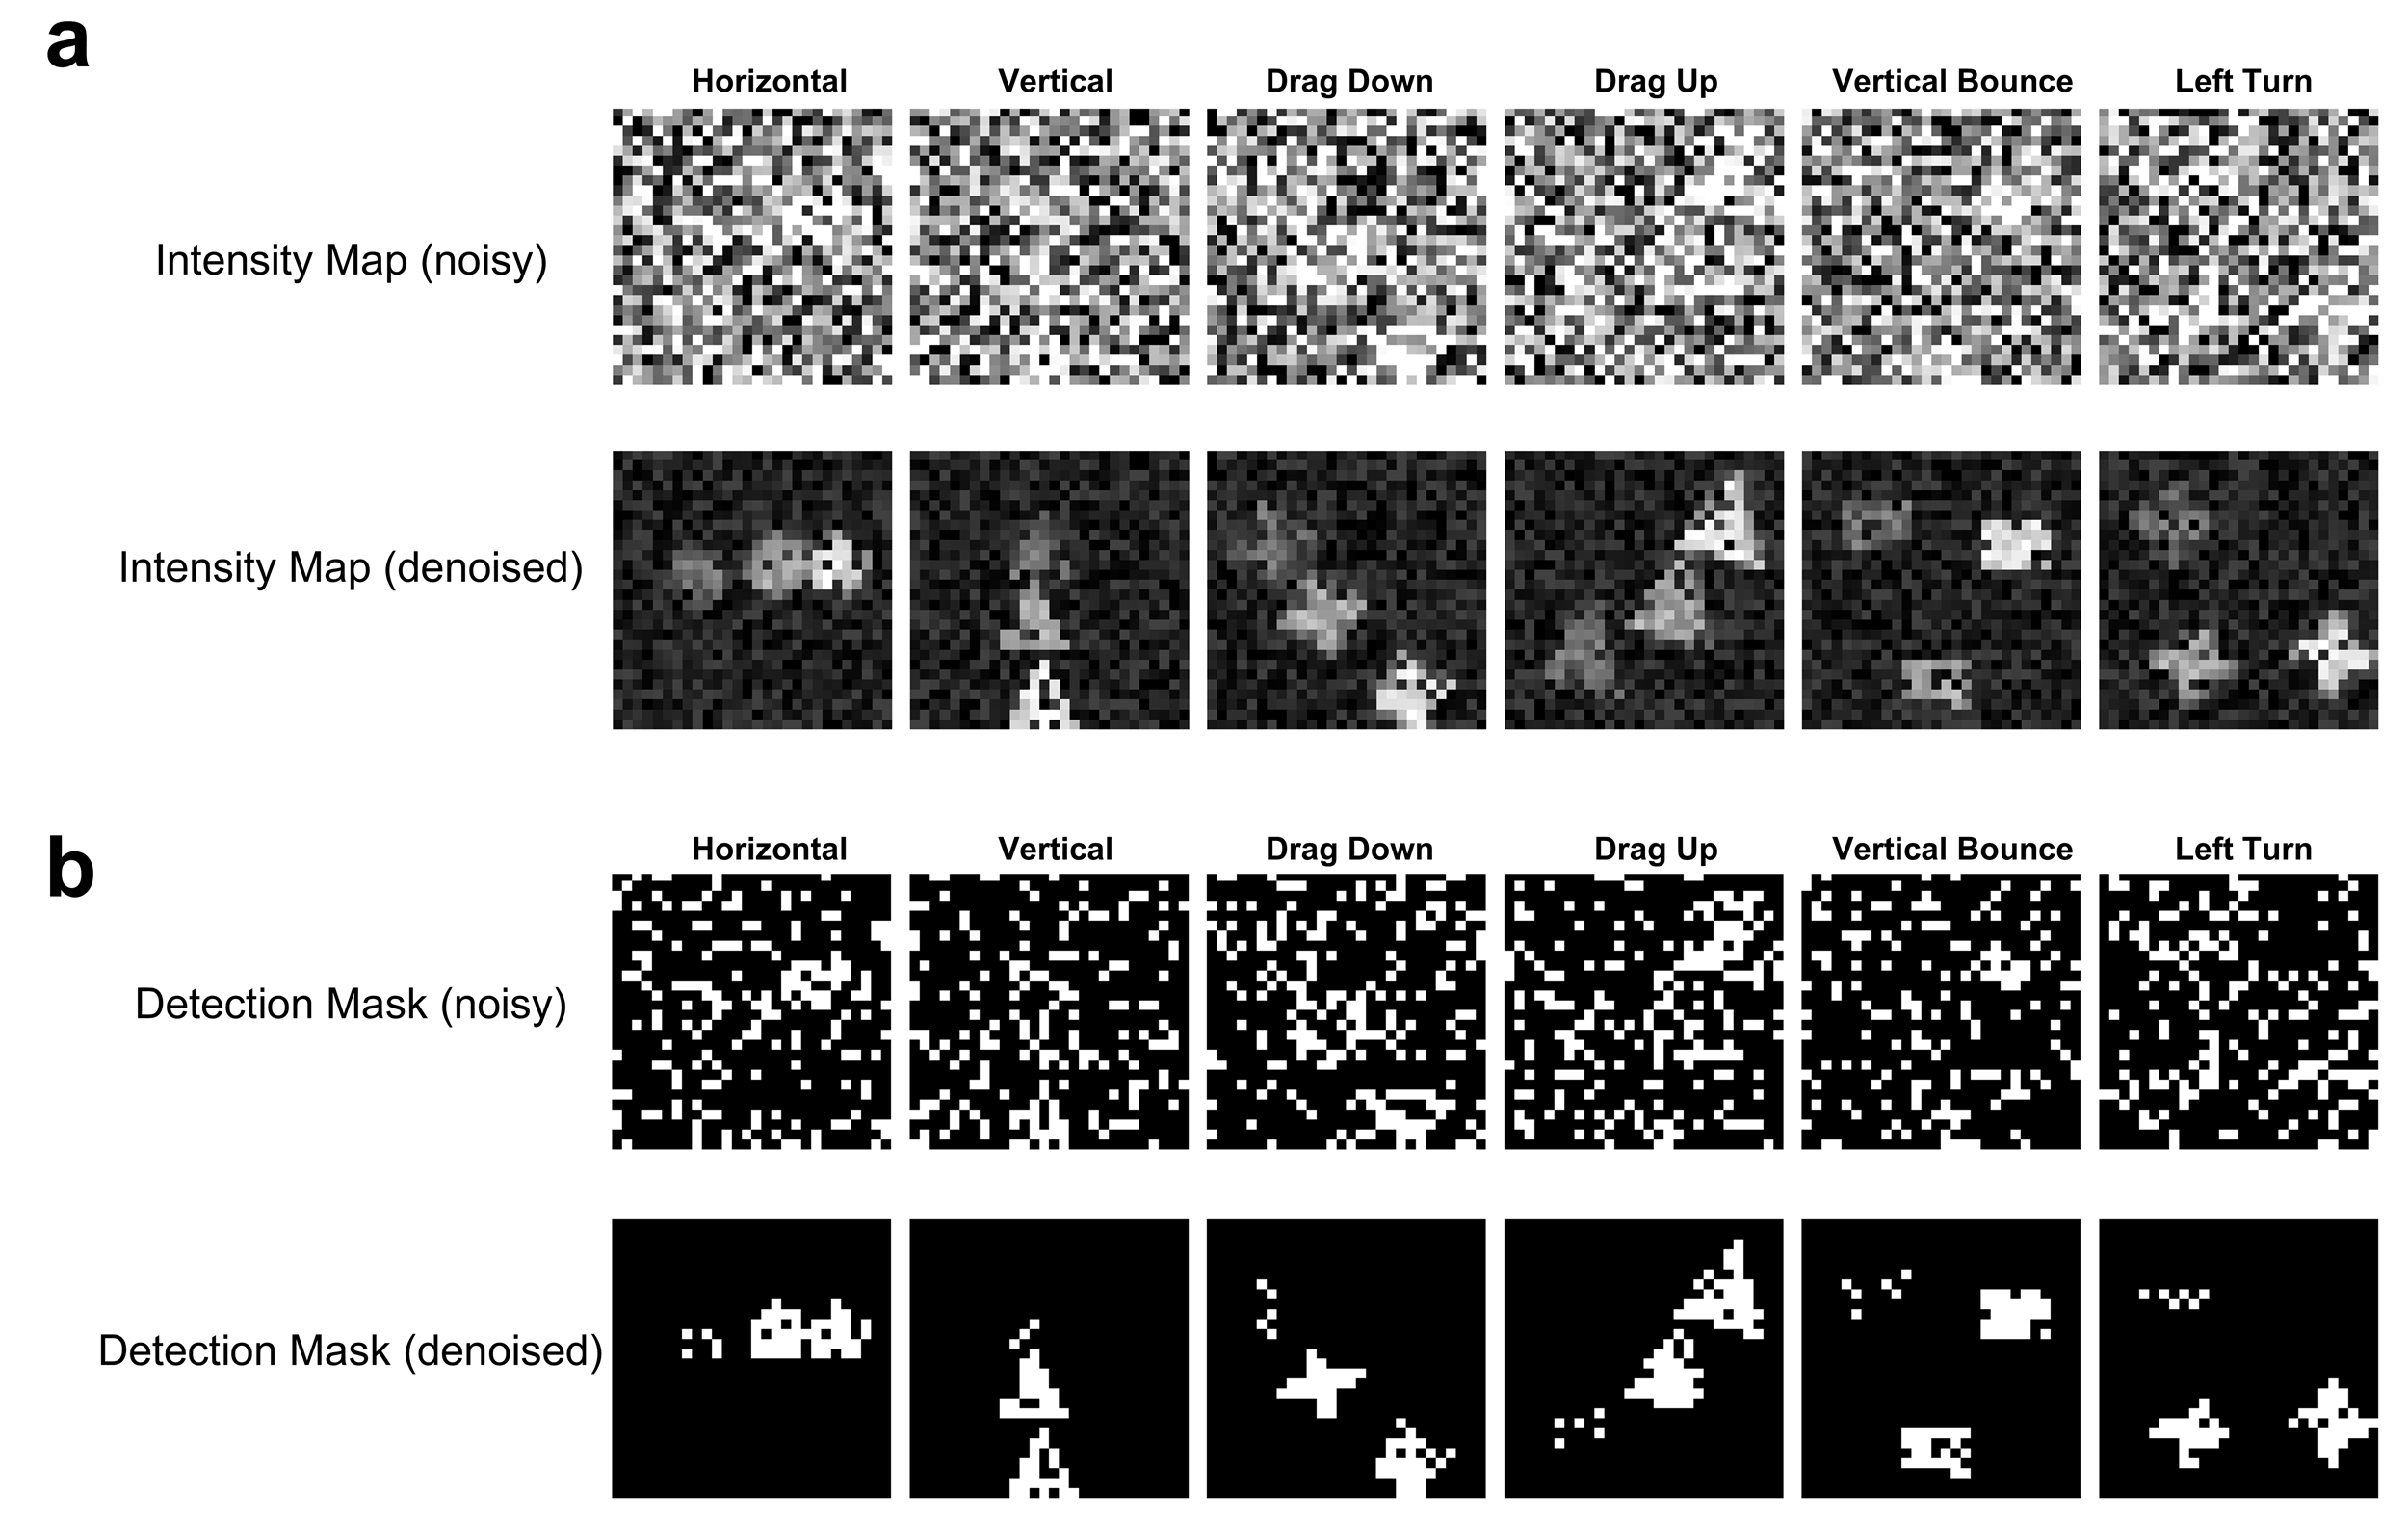


**Supplementary Figure 30. Data-stream evolution for six motion directions.** a) Binarized grayscale images before and after preprocessing. b) Hardware-preprocessed grayscale image streams used as inputs for subsequent algorithmic.


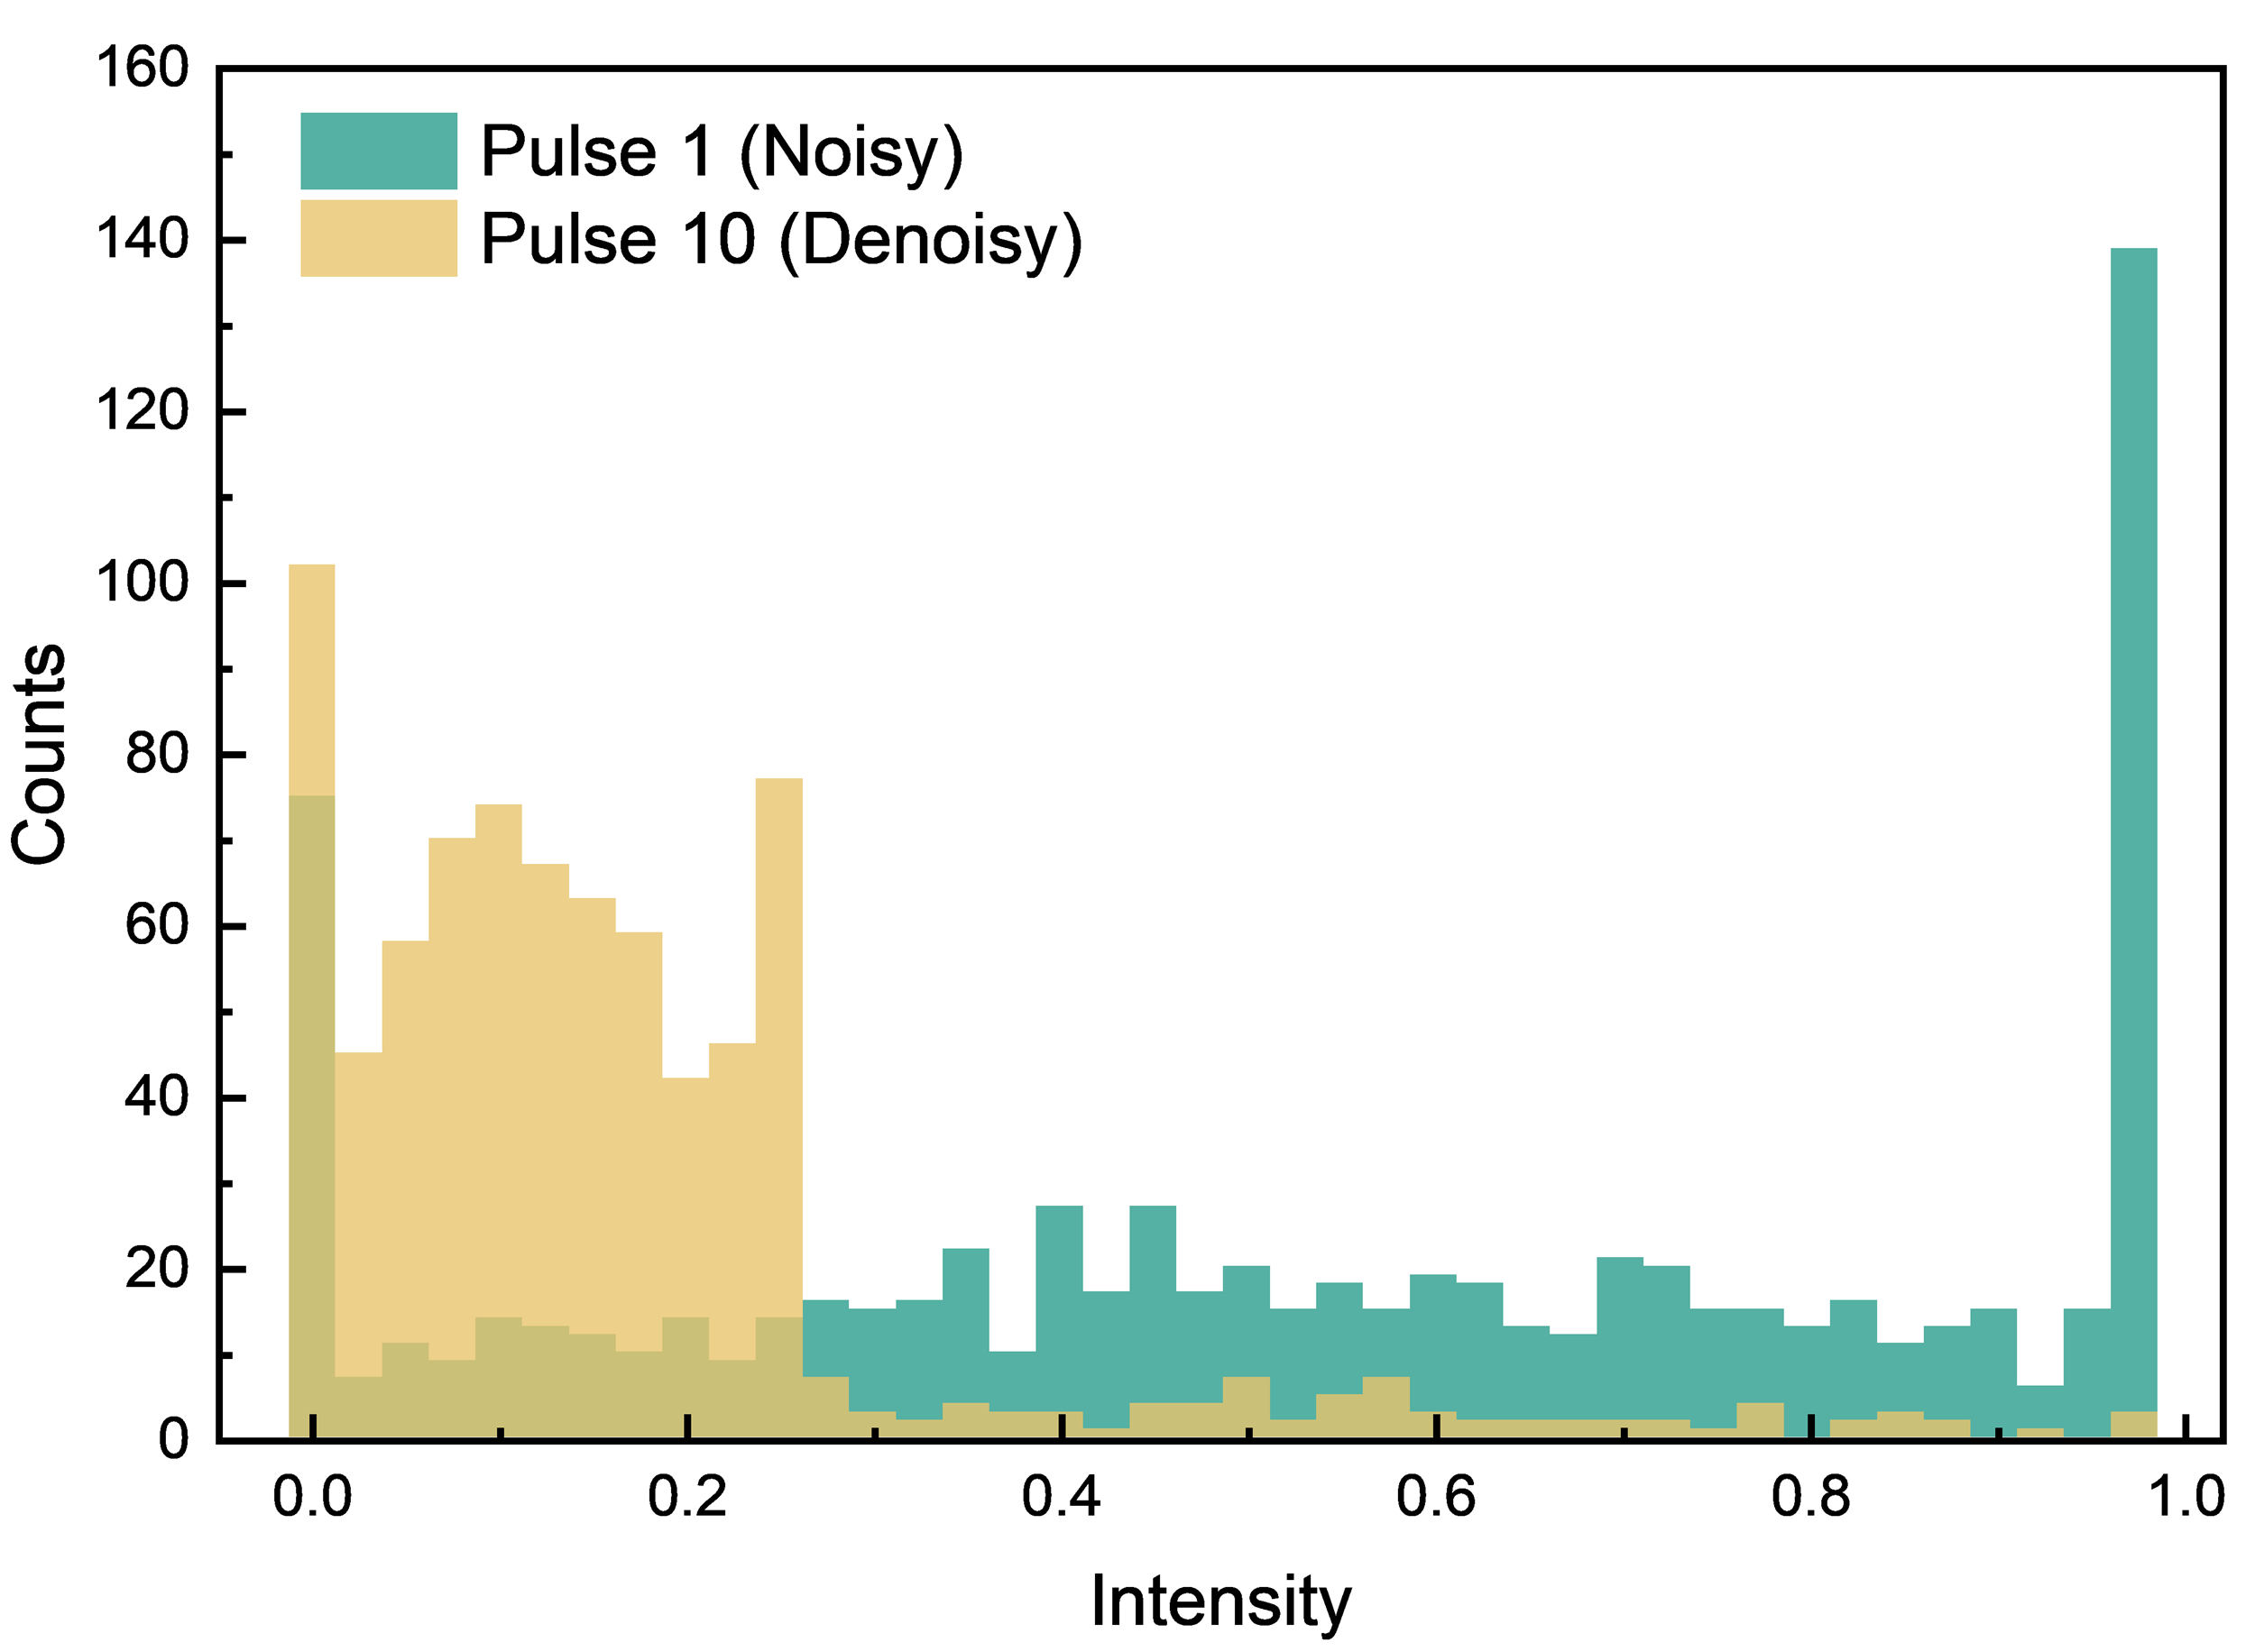


**Supplementary Figure 31. Brightness statistics before and after preprocessing.** Statistical comparison of image brightness values before and after device-level preprocessing. The initially broad and disordered brightness distribution becomes concentrated around informative high-brightness components, indicating that self-powered photomemristive gain modulation improves feature separability prior to software analysis.


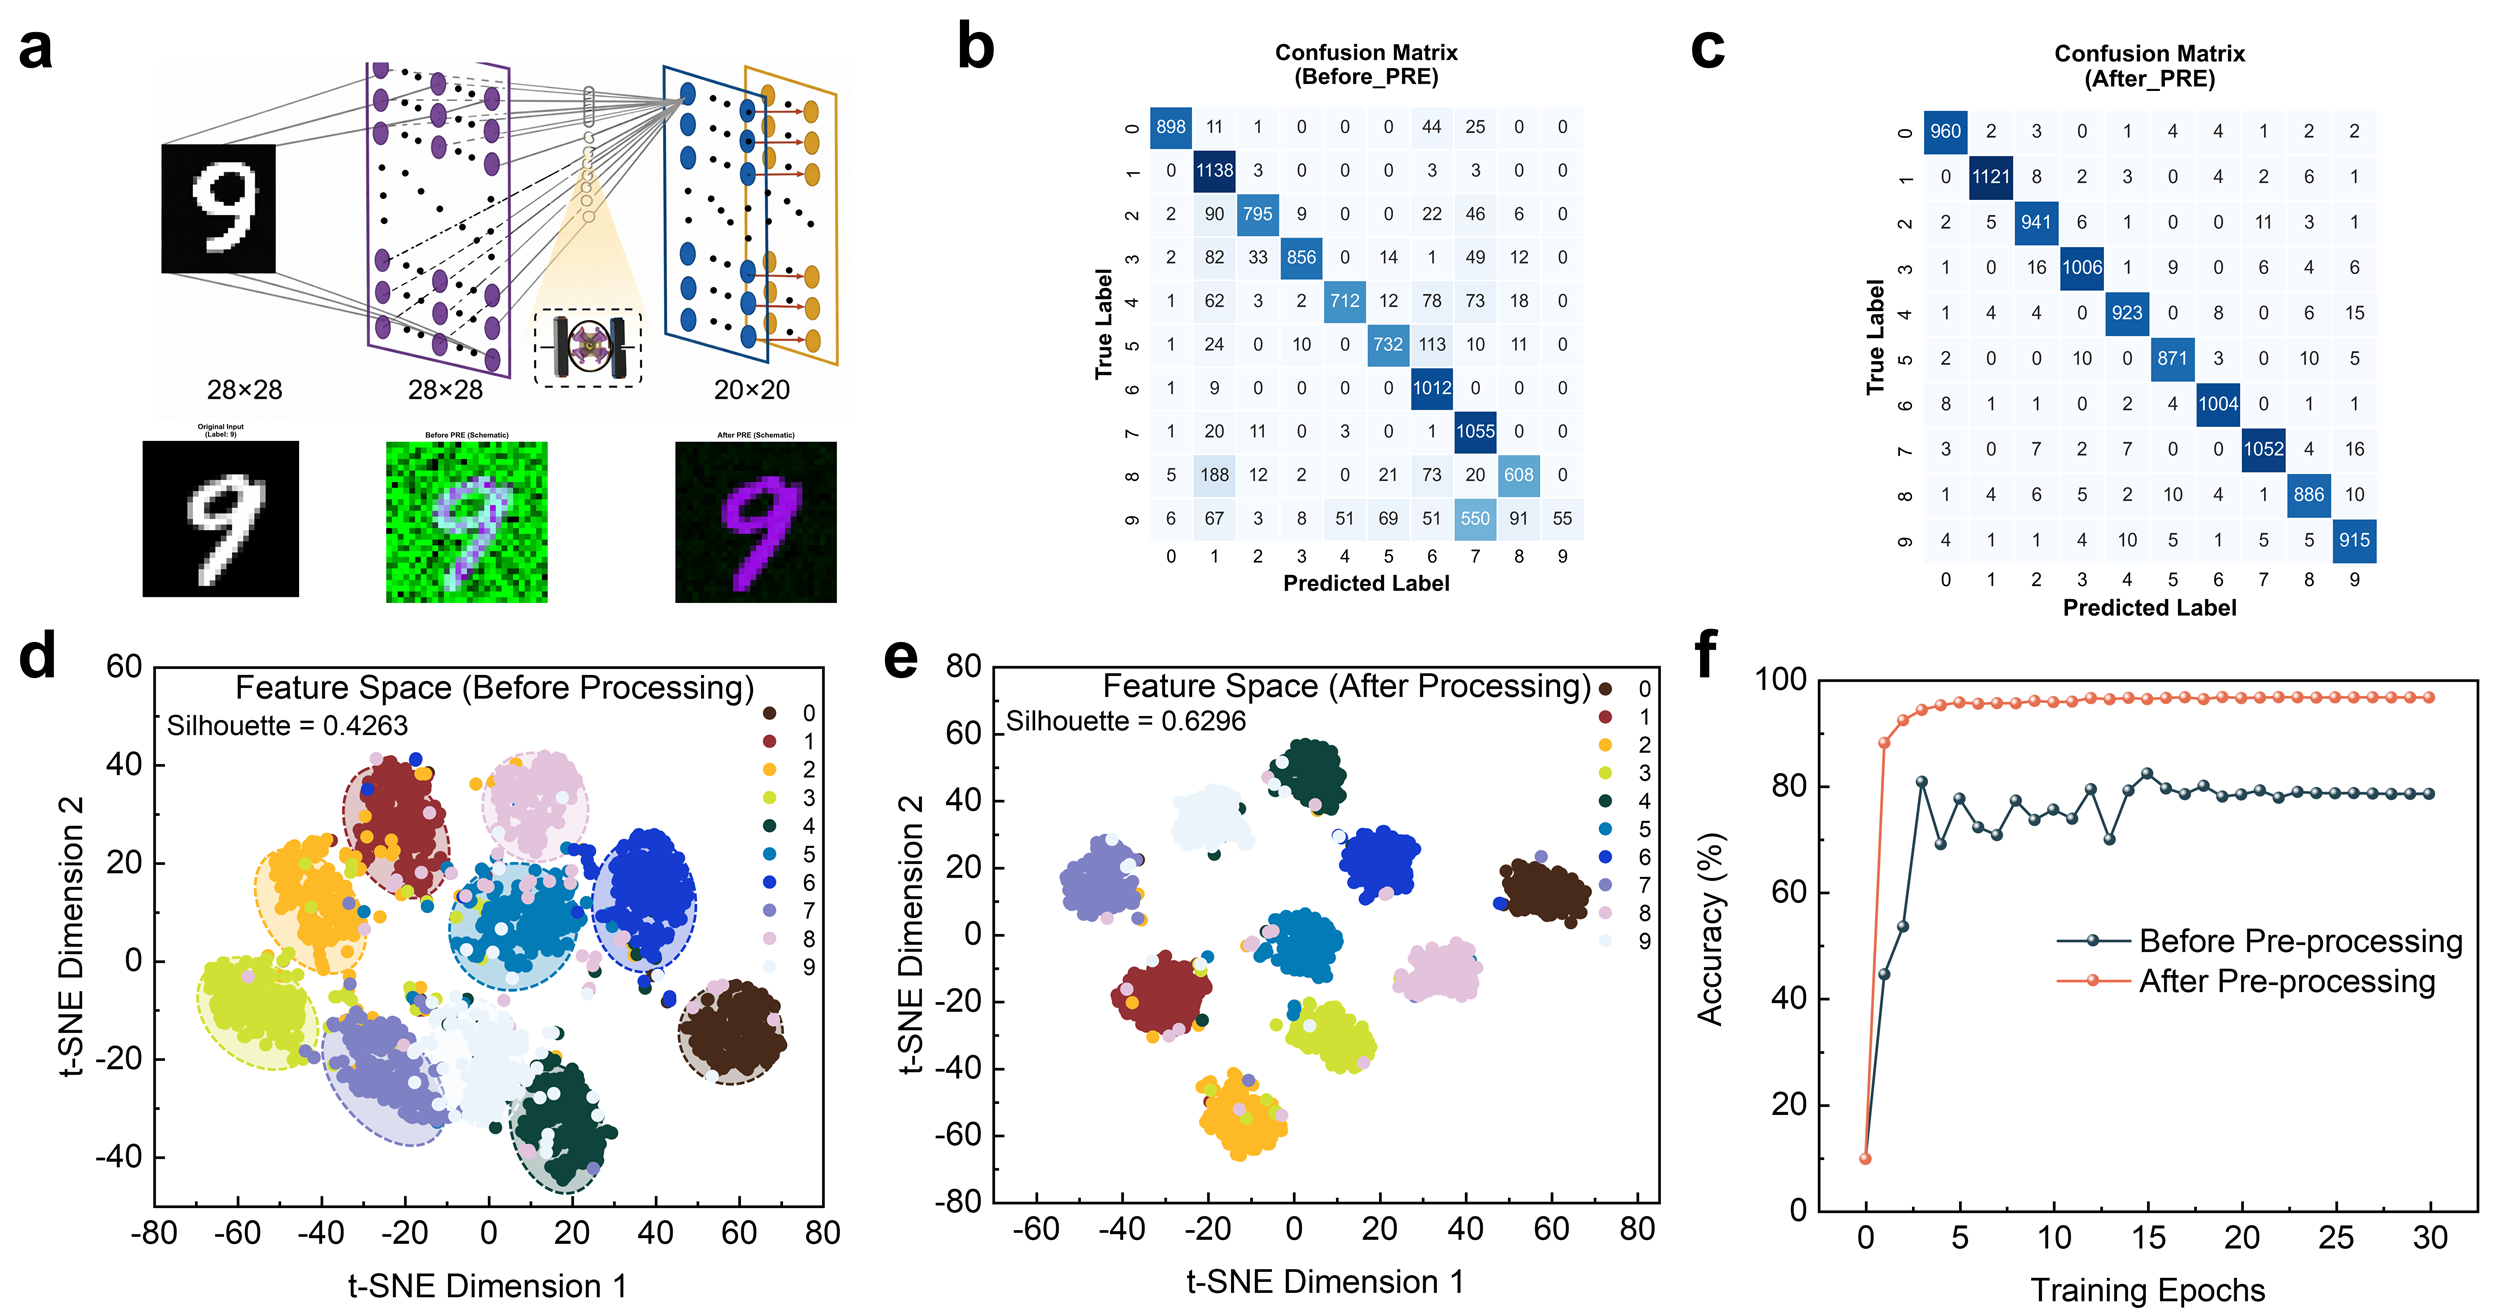


**Supplementary Figure 32. Digit-recognition task based on hardware-preprocessed imaging data.** a) Computational workflow used for digit recognition. Accuracy evolution b) before preprocessing and c) after preprocessing. Representative digit-recognition clustering results d) before preprocessing and e) after preprocessing. f) Comparison of accuracy curves before and after preprocessing.


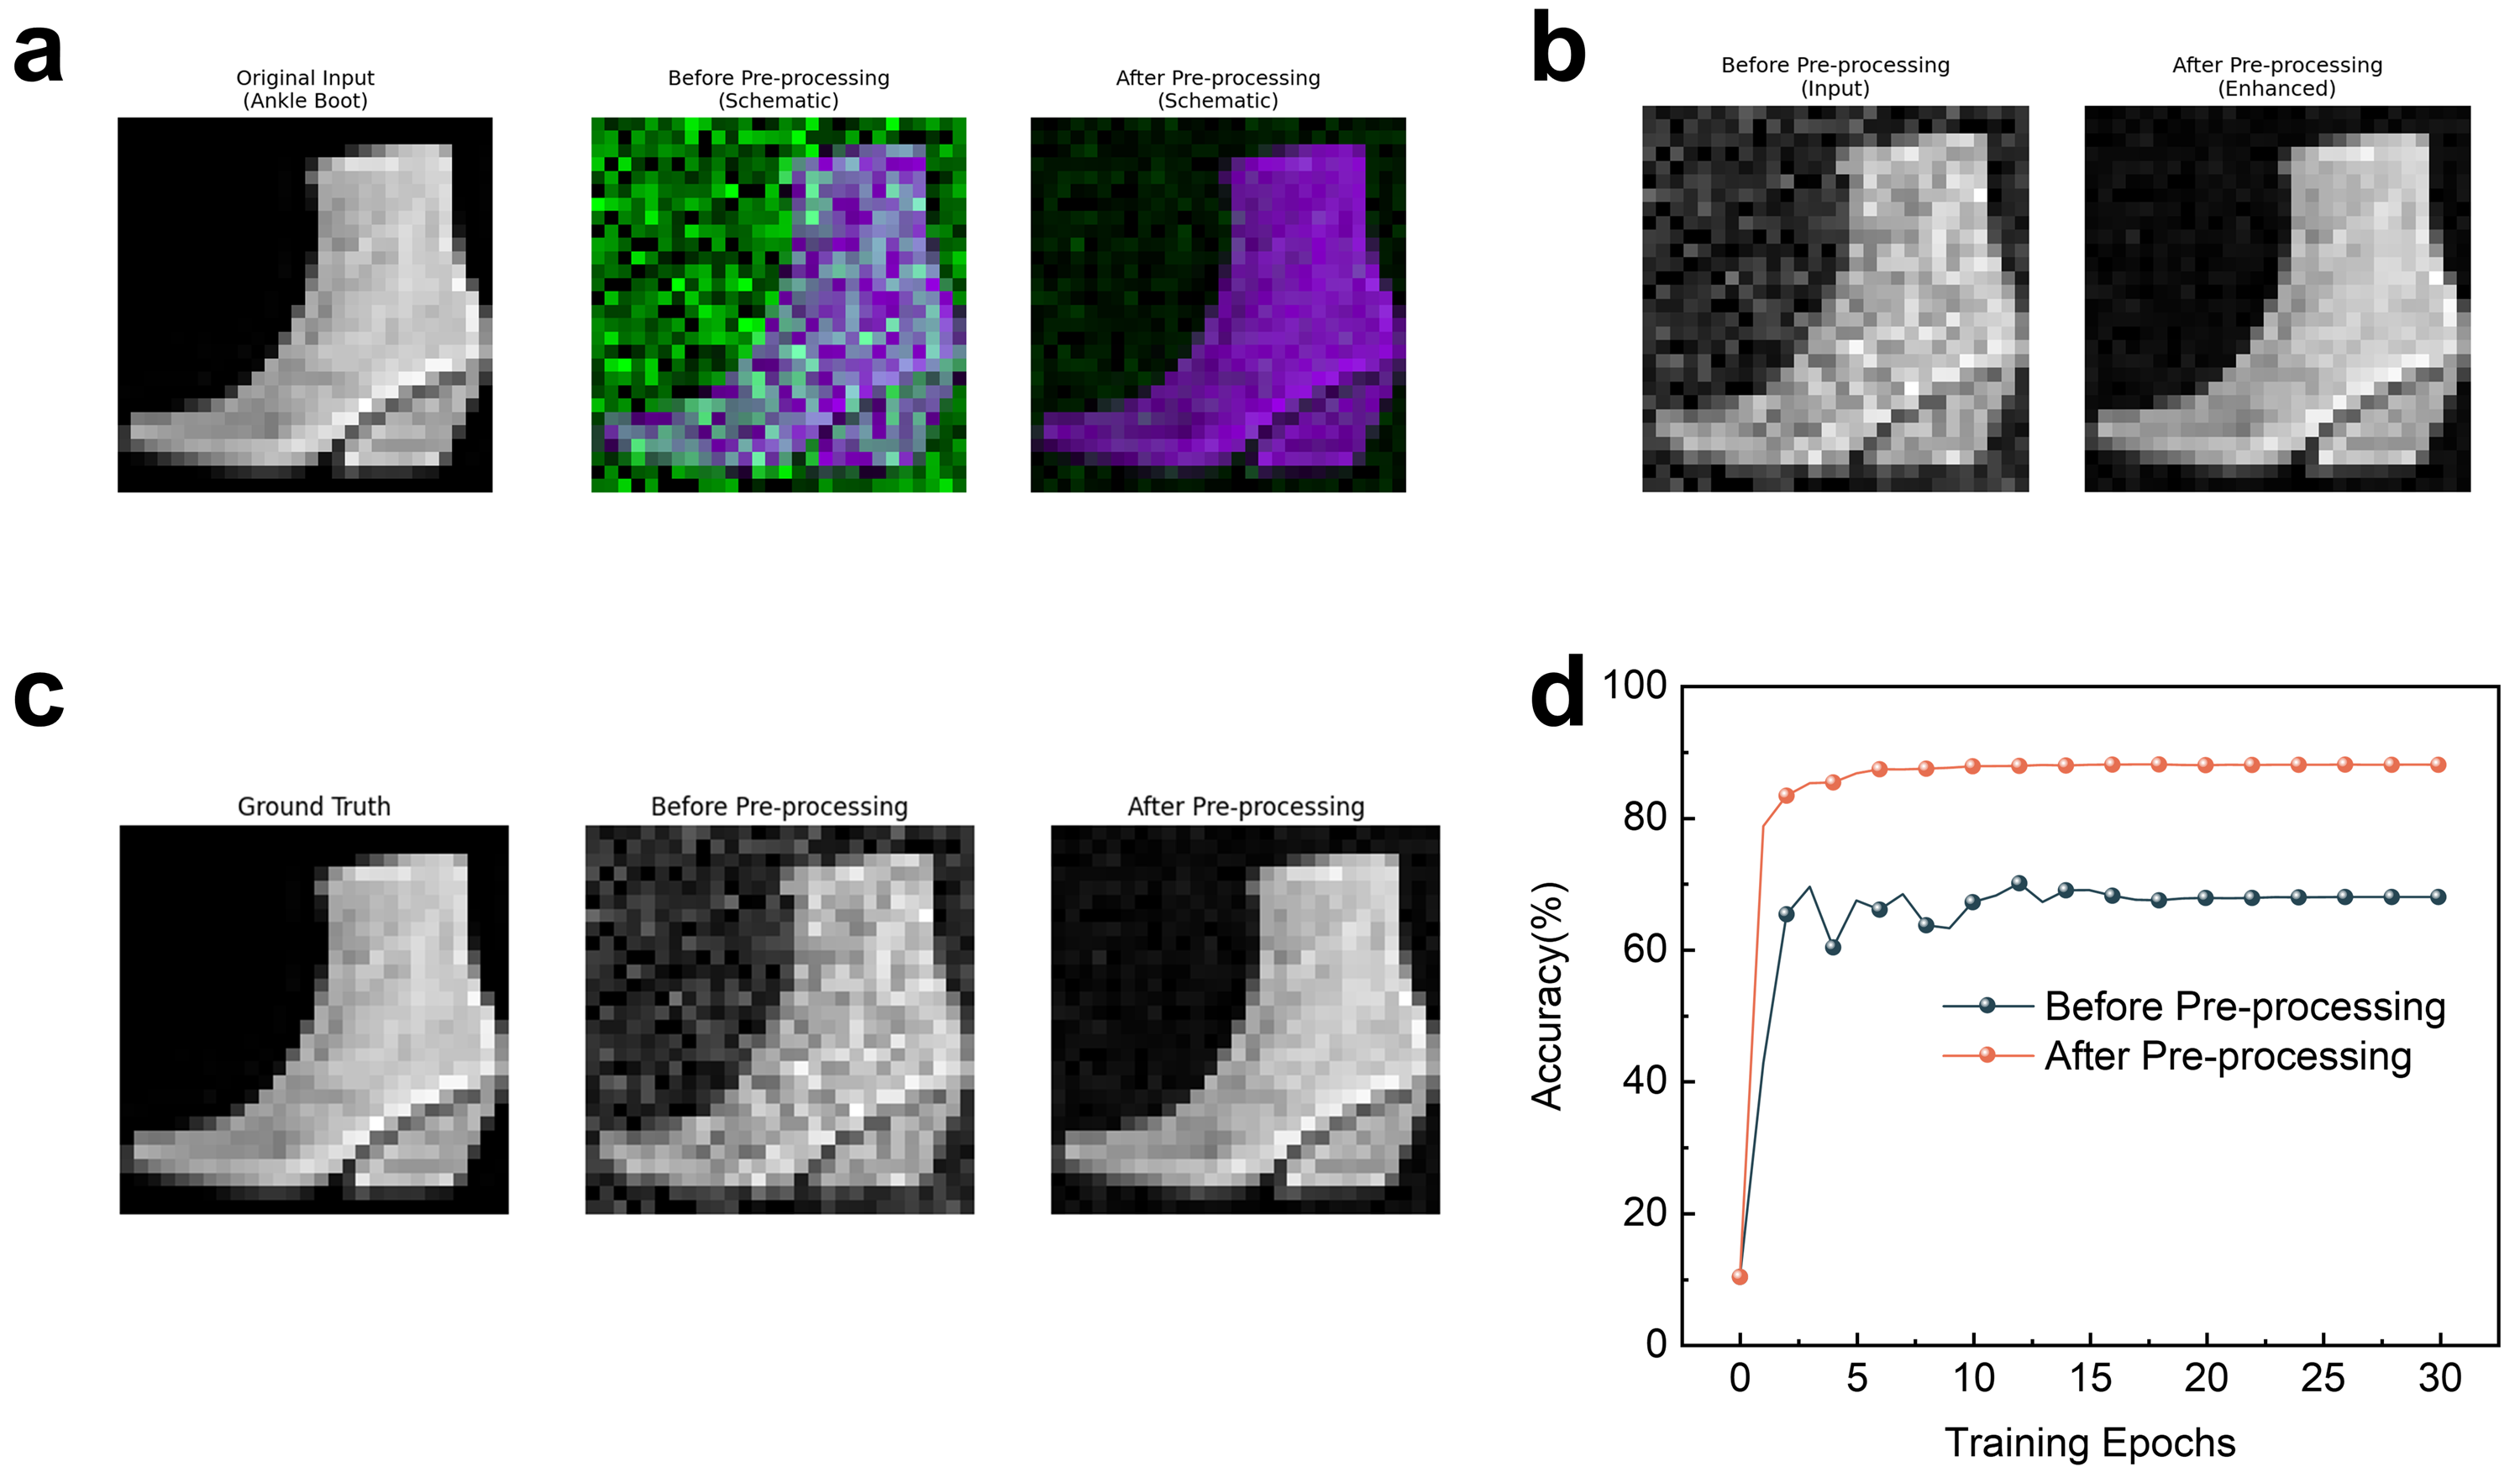


**Supplementary Figure 33. Shoes-recognition task based on processed imaging data.** a) Color images before and after preprocessing, where green represents the 520 nm background-noise response and purple represents the 375 nm effective-signal response. b) Grayscale images used by the classification system before and after preprocessing. c) Data-stream evolution from the ground-truth state to the noisy and enhanced states. d) Accuracy curves before and after preprocessing.

**Supplementary Note 1 | Photoinduced interfacial electric-field differentiation in polymer-modified photomemristors**

Finite-difference time-domain (FDTD) simulations were performed to analyse the local optical electric-field intensity distribution at the MAPbI3/polymer/Ag top interface. Because all polymer-modified devices were compared under identical illumination wavelengths, this analysis was used to resolve spatial electric-field redistribution rather than wavelength-dependent absorption4, 5. **Supplementary Fig. 20a-f** shows the interface-local normalized electric-field intensity (|E|²). In the polymer-free device, the optical field is mainly confined near the MAPbI3/Ag contact. After inserting polymer interlayers, the field distribution extends across the MAPbI3/polymer/Ag region, indicating that the polymer top layer directly reshapes the photoinduced interfacial field environment. The mean-subtracted |E|² maps in **Supplementary Fig. 20g-k** further reveal clear polymer-dependent differences. PS shows the strongest field displacement, with increased |E|² inside the PS layer and reduced |E|² on the MAPbI3 side. This means that the photoinduced field is shifted away from the perovskite-side recovery interface toward the polymer/Ag contact. Therefore, the strong field response of PS is not spatially favourable for stabilizing the electron-rich MAPbI3 interface required for persistent photomemristive relaxation. PVA shows broad field depletion in the polymer region, while PVP remains close to the averaged response, indicating weaker interfacial field regulation. By contrast, PMMA and PBMA retain a moderate field component on the MAPbI3 side and avoid excessive field localization in the polymer/Ag region. This ester-carbonyl-type field profile is more favourable for maintaining photogenerated electron accumulation at the MAPbI3 top interface, where ion-assisted electrostatic compensation occurs after illumination. PBMA combines this favourable MAPbI3-side field distribution with its molecular side-chain function: the ester carbonyl group anchors Pb-related defect sites and restricts migration of I-, whereas the butyl side chain enhances electron-side relaxation through steric confinement. This field-chemistry coupling stabilizes the electron-rich top interface and prolongs ion-electron recovery, thereby supporting the persistent self-powered photomemristive response. To further link optical-field redistribution with carrier-level interfacial recovery, finite-element simulations were performed using COMSOL Multiphysics within a one-dimensional Poisson-drift-diffusion framework. The device was modelled along the thickness direction, with P3HT and MAPbI3 treated as semiconductor regions and the polymer overlayer treated as a dielectric interfacial layer. The optical generation profile extracted from the FDTD model was introduced as a fixed photogeneration source6, 7, 8. The simulated electrostatic-field and electron-density maps show that polymer insertion reshapes the MAPbI3-side interfacial field and charge distribution (**Supplementary Fig. 21**). PS induces pronounced electron accumulation near the MAPbI3 side, indicating strong local charge accumulation, whereas PMMA and PBMA maintain a more moderate electron-rich interfacial state. Therefore, the PBMA interface should be understood as a balanced ion-electron coupling design, rather than as maximal charge accumulation or direct iodide blocking by the butyl chain.

**Supplementary Note 2 | Physical preprocessing for dynamic-object motion analysis**

**Supplementary Figs. 29** and **30** summarize the hardware-level preprocessing strategy used for dynamic-object analysis. At an integration time of 0.5 s, the device exhibits paired-pulse facilitation factors of 106.988% under 520 nm illumination and 130.7% under 375 nm illumination. The two wavelengths are therefore assigned to the background-noise and effective-signal channels, respectively. Under 10 consecutive optical pulses, this gain asymmetry is accumulated multiplicatively, producing a progressively enhanced separation between the dynamic target and the background response. In this way, the memristive device does not merely denoise the visual input, but generates a spatiotemporal feature stream more suitable for motion analysis. This physically encoded input is illustrated in **Supplementary Fig. 29a and b**. The color comparison in **Supplementary Fig. 29a** shows that the effective-signal component becomes increasingly dominant after preprocessing, whereas the grayscale outputs in **Supplementary Fig. 29b** provide the actual representations used for downstream analysis. The consequence for dynamic-object algorithms is further shown in **Supplementary Fig. 30a-c**. Binarization in **Supplementary Fig. 30a** highlights the sharpening of the moving foreground after preprocessing, **Supplementary Fig. 30b** shows the grayscale image stream read by the classifier, and **Supplementary Fig. 30c** quantifies the corresponding redistribution of brightness toward a more concentrated target-dominant state. Together, these results show that the CMOS-integrated perovskite photomemristor array performs hardware-level front-end preprocessing for dynamic-object motion analysis. The device physically enhances target-related motion streams and generates spatiotemporal feature representations that are subsequently used for algorithmic clustering or recognition.

**Supplementary Note 3 | Algorithmic clustering of hardware-encoded dynamic trajectories**

The algorithmic analysis was used to evaluate the separability of trajectory maps generated by the CMOS-integrated perovskite photomemristor array. For the six-direction motion analysis in **Fig. 5e-g**, each hardware-encoded trajectory map was vectorized into a feature vector , where denotes the sample index. To reduce brightness variation while preserving spatial motion features, each vector was normalized as

where is a small constant to avoid division by zero.

Three types of inputs were analysed: ideal noiseless maps, initial pulse-1 maps and enhanced pulse-10 maps. The normalized trajectory vectors were projected into a two-dimensional feature space using t-distributed stochastic neighbour embedding (t-SNE), which preserves local similarity relationships by minimizing the Kullback-Leibler divergence between high-dimensional and low-dimensional distributions1, 2:

where and are pairwise similarities in the original and embedded spaces, respectively. Density-based spatial clustering of applications with noise (DBSCAN) was then applied to the embedded features. The clustering was performed without using motion-direction labels; the known six directions were used only for post-clustering evaluation. Cluster separability was quantified using the silhouette coefficient3:

where is the mean intra-cluster distance of sample , and is the smallest mean distance to samples in other clusters. The ideal noiseless maps give a clustering score of 0.9128, whereas the initial pulse-1 maps show a lower score of 0.6011. After ten optical pulses, the enhanced maps reach a clustering score of 0.9090, approaching the ideal reference. Consistently, the silhouette coefficient increases from 0.5961 to 0.9131 after device-level preprocessing. These results indicate that the perovskite photomemristor array records motion trajectories with improved feature separability, whereas t-SNE/DBSCAN is used only to evaluate the separability of the device-generated motion features. All algorithmic analyses were performed on image streams generated from the CMOS-integrated perovskite photomemristor array. For motion-direction analysis, each trajectory map was vectorized, normalized and embedded into a two-dimensional feature space using t-SNE before DBSCAN clustering. For digit- and shoes-recognition tasks, the unprocessed and device-preprocessed image streams were supplied to the same downstream classifier to ensure that the comparison reflected differences in input representation rather than changes in model architecture. Classification accuracy was calculated from the predicted and ground-truth labels. All preprocessing and classification parameters were kept identical between the unprocessed and device-preprocessed datasets.

**Supplementary Note 4 | Digit-recognition task based on processed imaging data**

**Supplementary Fig. 32** evaluates whether the device-level preprocessing improves the separability of static visual inputs in a digit-recognition task. The purpose of this task is not to introduce a new classifier, but to examine whether the self-powered perovskite photomemristor array generates a more informative input representation before downstream inference. The computational workflow is shown in **Supplementary Fig. 32a**. Noisy digit images and device-preprocessed digit images were converted into grayscale image streams and supplied to the same downstream recognition pipeline. In this comparison, the classification procedure was kept unchanged, so that the difference in recognition behaviour reflects the quality of the input representation generated before software analysis. The physical preprocessing arises from wavelength-dependent gain asymmetry of the photomemristor. At an integration time of 0.5 s, the 520 nm channel gives a lower paired-pulse facilitation factor than the 375 nm channel. Repeated optical stimulation therefore amplifies the effective-signal component more strongly than the background component, redistributing the image intensity toward digit-relevant features before classification. The accuracy evolution before and after preprocessing is compared in **Supplementary Fig. 32b, c** and **f**, while the representative feature projections in **Supplementary Fig. 32d**, e visualize the improved separability of the digit classes after device-level preprocessing. These results show that the perovskite photomemristor array functions as a physical visual-conditioning layer, improving the input feature distribution delivered to the classifier rather than replacing the downstream recognition algorithm.

**Supplementary Note 5 | Shoes-recognition task based on processed imaging data**

**Supplementary Fig. 33** further examines the device-level preprocessing capability using a shoes-recognition task, which contains more complex object contours and background fluctuations than the digit patterns. The task was designed to evaluate whether the differential optical gain of the perovskite photomemristor array can suppress background-dominated components while retaining object-relevant grayscale features. As in the digit-recognition task, the 520 nm response was assigned to the background-noise channel and the 375 nm response to the effective-signal channel. After six consecutive optical pulses, the accumulated gain difference enhances the object-related response and attenuates the relative contribution of background fluctuations.

This physical enhancement is shown in **Supplementary Fig. 33a-c**. The color images in **Supplementary Fig. 33a** visualize the separation between background and effective-signal components before and after preprocessing. The grayscale images in **Supplementary Fig. 33b** correspond to the actual input representations used by the classification system, showing that the shoe contour becomes more distinguishable after device-level preprocessing. The data-stream evolution in **Supplementary Fig. 33c** compares the ground-truth, noisy and enhanced states, indicating that the device redistributes the grayscale intensity toward the informative object region. The accuracy curves in **Supplementary Fig. 33d** confirm that this physically enhanced representation improves downstream shoes-recognition performance. These results demonstrate that the vertically partitioned interface perovskite photomemristor array provides general visual preprocessing for both simple digit patterns and more complex object images, while final category assignment remains performed by the downstream algorithm.

**Supplementary Reference**

1. Pang, X.*, et al.* Non-volatile rippled-assisted optoelectronic array for all-day motion detection and recognition. *Nat. Commun.* **15**, 1613 (2024).

2. Zhang, Z.*, et al.* All-in-one two-dimensional retinomorphic hardware device for motion detection and recognition. *Nat. Nanotechnol.* **17**, 27-32 (2022).

3. Van der Maaten, L. & Hinton, G. Visualizing data using t-SNE. *Journal of machine learning research* **9**, 2579-2605 (2008).

4. Zhan, Y.*, et al.* Nacre inspired robust self-encapsulating flexible perovskite photodetector. *Nano Energy* **98**, 107254 (2022).

5. Zhang, Q.*, et al.* Light out‐coupling management in perovskite LEDs-what can we learn from the past? *Advanced Functional Materials* **30**, 2002570 (2020).

6. Minenkov, A.*, et al.* Monitoring the electrochemical failure of indium tin oxide electrodes via operando ellipsometry complemented by electron microscopy and spectroscopy. *ACS Applied Materials & Interfaces* **16**, 9517-9531 (2024).

7. Singh, A. & Gagliardi, A. Drift-diffusion modeling of perovskite solar cells: past and future possibilities. *EES Solar* **1**, 694-711 (2025).

8. Zhuravskyi, Y.*, et al.* Quantitative structure-permittivity relationship study of a series of polymers. *ACS Materials Au* **4**, 195-203 (2024).

9. Liu, T.*, et al.* Chelated tin halide perovskite for near-infrared neuromorphic imaging array enabling object recognition and motion perception. *Nat. Commun.* **16**, 4261 (2025).

10. Wang, H.*, et al.* Dual-way alternation sensing memristors based on (BA)2(MA)3Pb4Br13 ferroelectric quantum dots with sub-0.16 V switching for broadband image-recognition systems. *Advanced Functional Materials* **35**, 2510543 (2025).
